# Supplementary material for: A circulation-based performance atlas of the CMIP5 and 6 models for regional climate studies in the Northern Hemisphere mid-to-high latitudes
Source: Copernicus journal article supplement (doi:10.5194/gmd-15-1375-2022), 2022-02-17
Supplement: Supplementary file 18 [file gmd-15-1375-2022-supplement.zip]

Archive with 151 entries (145 files):
- supplementary_material/
- supplementary_material/MAE_csiro_mk3_6_0_r1i1p1_wrt_interim_nh_1979-2005.pdf
- supplementary_material/readme.txt
- supplementary_material/figs-refjra55/
- supplementary_material/figs-refjra55/taylor/
- supplementary_material/figs-refjra55/taylor/LWT_3_wrt_jra55_nh_1979-2005.pdf
- supplementary_material/figs-refjra55/taylor/LWT_10_wrt_jra55_nh_1979-2005.pdf
- supplementary_material/figs-refjra55/taylor/LWT_11_wrt_jra55_nh_1979-2005.pdf
- supplementary_material/figs-refjra55/taylor/LWT_25_wrt_jra55_nh_1979-2005.pdf
- supplementary_material/figs-refjra55/taylor/LWT_8_wrt_jra55_nh_1979-2005.pdf
- supplementary_material/figs-refjra55/taylor/LWT_15_wrt_jra55_nh_1979-2005.pdf
- supplementary_material/figs-refjra55/taylor/LWT_4_wrt_jra55_nh_1979-2005.pdf
- supplementary_material/figs-refjra55/taylor/LWT_6_wrt_jra55_nh_1979-2005.pdf
- supplementary_material/figs-refjra55/taylor/LWT_18_wrt_jra55_nh_1979-2005.pdf
- supplementary_material/figs-refjra55/taylor/LWT_1_wrt_jra55_nh_1979-2005.pdf
- supplementary_material/figs-refjra55/taylor/LWT_20_wrt_jra55_nh_1979-2005.pdf
- supplementary_material/figs-refjra55/taylor/LWT_27_wrt_jra55_nh_1979-2005.pdf
- supplementary_material/figs-refjra55/taylor/LWT_12_wrt_jra55_nh_1979-2005.pdf
- supplementary_material/figs-refjra55/taylor/LWT_9_wrt_jra55_nh_1979-2005.pdf
- supplementary_material/figs-refjra55/taylor/LWT_21_wrt_jra55_nh_1979-2005.pdf
- supplementary_material/figs-refjra55/taylor/LWT_7_wrt_jra55_nh_1979-2005.pdf
- supplementary_material/figs-refjra55/taylor/LWT_14_wrt_jra55_nh_1979-2005.pdf
- supplementary_material/figs-refjra55/taylor/LWT_19_wrt_jra55_nh_1979-2005.pdf
- supplementary_material/figs-refjra55/taylor/LWT_5_wrt_jra55_nh_1979-2005.pdf
- supplementary_material/figs-refjra55/taylor/LWT_24_wrt_jra55_nh_1979-2005.pdf
- supplementary_material/figs-refjra55/taylor/LWT_17_wrt_jra55_nh_1979-2005.pdf
- supplementary_material/figs-refjra55/taylor/LWT_22_wrt_jra55_nh_1979-2005.pdf
- supplementary_material/figs-refjra55/taylor/LWT_26_wrt_jra55_nh_1979-2005.pdf
- supplementary_material/figs-refjra55/taylor/LWT_16_wrt_jra55_nh_1979-2005.pdf
- supplementary_material/figs-refjra55/taylor/LWT_23_wrt_jra55_nh_1979-2005.pdf
- supplementary_material/figs-refjra55/taylor/LWT_13_wrt_jra55_nh_1979-2005.pdf
- supplementary_material/figs-refjra55/taylor/LWT_2_wrt_jra55_nh_1979-2005.pdf
- supplementary_material/figs-refjra55/as-figure-11-but-wrt-jra55.pdf
- supplementary_material/figs-refjra55/maps/
- supplementary_material/figs-refjra55/maps/rank/
- supplementary_material/figs-refjra55/maps/rank/rank_mpi_esm_lr_r1i1p1_wrt_jra55_nh_1979-2005.pdf
- supplementary_material/figs-refjra55/maps/rank/rank_cmcc_esm2_r1i1p1f1_wrt_jra55_nh_1979-2005.pdf
- supplementary_material/figs-refjra55/maps/rank/rank_access10_r1i1p1_wrt_jra55_1979-2005.png
- supplementary_material/figs-refjra55/maps/rank/rank_ec_earth3_cc_r1i1p1f1_wrt_jra55_nh_1979-2005.pdf
- supplementary_material/figs-refjra55/maps/rank/rank_ccsm4_r6i1p1_wrt_jra55_nh_1979-2005.pdf
- supplementary_material/figs-refjra55/maps/rank/rank_cnrm_cm5_r1i1p1_wrt_jra55_nh_1979-2005.pdf
- supplementary_material/figs-refjra55/maps/rank/rank_ipsl_cm5a_lr_r1i1p1_wrt_jra55_nh_1979-2005.pdf
- supplementary_material/figs-refjra55/maps/rank/rank_bcc_csm2_mr_r1i1p1f1_wrt_jra55_nh_1979-2005.pdf
- supplementary_material/figs-refjra55/maps/rank/rank_mpi_esm_mr_r1i1p1_wrt_jra55_nh_1979-2005.pdf
- supplementary_material/figs-refjra55/maps/rank/rank_taiesm1_r1i1p1f1_wrt_jra55_nh_1979-2005.pdf
- supplementary_material/figs-refjra55/maps/rank/rank_ec_earth3_r1i1p1f1_wrt_jra55_nh_1979-2005.pdf
- supplementary_material/figs-refjra55/maps/rank/rank_awi_esm_1_1_lr_r1i1p1f1_wrt_jra55_nh_1979-2005.pdf
- supplementary_material/figs-refjra55/maps/rank/rank_cmcc_cm_r1i1p1_wrt_jra55_nh_1979-2005.pdf
- supplementary_material/figs-refjra55/maps/rank/rank_giss_e2_h_r6i1p1_wrt_jra55_nh_1979-2005.pdf
- supplementary_material/figs-refjra55/maps/rank/rank_cnrm_cm6_1_hr_r1i1p1f2_wrt_jra55_nh_1979-2005.pdf
- supplementary_material/figs-refjra55/maps/rank/rank_csiro_mk3_6_0_r1i1p1_wrt_jra55_nh_1979-2005.pdf
- supplementary_material/figs-refjra55/maps/rank/rank_mpi_esm_1_2_hr_r1i1p1f1_wrt_jra55_nh_1979-2005.pdf
- supplementary_material/figs-refjra55/maps/rank/rank_miroc6_r3i1p1f1_wrt_jra55_nh_1979-2005.pdf
- supplementary_material/figs-refjra55/maps/rank/rank_gfdl_cm4_r1i1p1f1_wrt_jra55_nh_1979-2005.pdf
- supplementary_material/figs-refjra55/maps/rank/rank_ec_earth3_veg_lr_r1i1p1f1_wrt_jra55_nh_1979-2005.pdf
- supplementary_material/figs-refjra55/maps/rank/rank_hadgem2_cc_r1i1p1_wrt_jra55_nh_1979-2005.pdf
- supplementary_material/figs-refjra55/maps/rank/rank_access_cm2_r1i1p1f1_wrt_jra55_nh_1979-2005.pdf
- supplementary_material/figs-refjra55/maps/rank/rank_cnrm_cm6_1_r1i1p1f2_wrt_jra55_nh_1979-2005.pdf
- supplementary_material/figs-refjra55/maps/rank/rank_iitm_esm_r1i1p1f1_wrt_jra55_nh_1979-2005.pdf
- supplementary_material/figs-refjra55/maps/rank/rank_nesm3_r1i1p1f1_wrt_jra55_nh_1979-2005.pdf
- supplementary_material/figs-refjra55/maps/rank/rank_noresm2_lm_r1i1p1f1_wrt_jra55_nh_1979-2005.pdf
- supplementary_material/figs-refjra55/maps/rank/rank_miroc5_r1i1p1_wrt_jra55_nh_1979-2005.pdf
- supplementary_material/figs-refjra55/maps/rank/rank_mri_esm2_0_r1i1p1f1_wrt_jra55_nh_1979-2005.pdf
- supplementary_material/figs-refjra55/maps/rank/rank_giss_e2_1_g_r1i1p1f1_wrt_jra55_nh_1979-2005.pdf
- supplementary_material/figs-refjra55/maps/rank/rank_access_esm1_5_r1i1p1f1_wrt_jra55_nh_1979-2005.pdf
- supplementary_material/figs-refjra55/maps/rank/rank_canesm2_r1i1p1_wrt_jra55_nh_1979-2005.pdf
- supplementary_material/figs-refjra55/maps/rank/rank_sam0_unicon_r1i1p1f1_wrt_jra55_nh_1979-2005.pdf
- supplementary_material/figs-refjra55/maps/rank/rank_gfdl_cm3_r1i1p1_wrt_jra55_nh_1979-2005.pdf
- supplementary_material/figs-refjra55/maps/rank/rank_miroc_es2l_r5i1p1f2_wrt_jra55_nh_1979-2005.pdf
- supplementary_material/figs-refjra55/maps/rank/rank_access10_r1i1p1_wrt_jra55_nh_1979-2005.pdf
- supplementary_material/figs-refjra55/maps/rank/rank_ipsl_cm5a_mr_r1i1p1_wrt_jra55_nh_1979-2005.pdf
- supplementary_material/figs-refjra55/maps/rank/rank_kiost_esm_r1i1p1f1_wrt_jra55_nh_1979-2005.pdf
- supplementary_material/figs-refjra55/maps/rank/rank_cmcc_cm2_sr5_r1i1p1f1_wrt_jra55_nh_1979-2005.pdf
- supplementary_material/figs-refjra55/maps/rank/rank_inm_cm4_r1i1p1_wrt_jra55_nh_1979-2005.pdf
- supplementary_material/figs-refjra55/maps/rank/rank_access13_r1i1p1_wrt_jra55_nh_1979-2005.pdf
- supplementary_material/figs-refjra55/maps/rank/rank_hadgem2_es_r1i1p1_wrt_jra55_nh_1979-2005.pdf
- supplementary_material/figs-refjra55/maps/rank/rank_miroc_esm_r1i1p1_wrt_jra55_nh_1979-2005.pdf
- supplementary_material/figs-refjra55/maps/rank/rank_mri_esm1_r1i1p1_wrt_jra55_nh_1979-2005.pdf
- supplementary_material/figs-refjra55/maps/rank/rank_giss_e2_r_r6i1p1_wrt_jra55_nh_1979-2005.pdf
- supplementary_material/figs-refjra55/maps/rank/rank_ec_earth3_veg_r1i1p1f1_wrt_jra55_nh_1979-2005.pdf
- supplementary_material/figs-refjra55/maps/rank/rank_fgoals_g3_r3i1p1f1_wrt_jra55_nh_1979-2005.pdf
- supplementary_material/figs-refjra55/maps/rank/rank_fgoals_g2_r1i1p1_wrt_jra55_nh_1979-2005.pdf
- supplementary_material/figs-refjra55/maps/rank/rank_mpi_esm_1_2_lr_r1i1p1f1_wrt_jra55_nh_1979-2005.pdf
- supplementary_material/figs-refjra55/maps/rank/rank_ec_earth3_aerchem_r1i1p1f1_wrt_jra55_nh_1979-2005.pdf
- supplementary_material/figs-refjra55/maps/rank/rank_ec_earth_r12i1p1_wrt_jra55_nh_1979-2005.pdf
- supplementary_material/figs-refjra55/maps/rank/rank_cnrm_esm2_1_r1i1p1f2_wrt_jra55_nh_1979-2005.pdf
- supplementary_material/figs-refjra55/maps/rank/rank_noresm1_m_r1i1p1_wrt_jra55_nh_1979-2005.pdf
- supplementary_material/figs-refjra55/maps/rank/rank_noresm2_mm_r1i1p1f1_wrt_jra55_nh_1979-2005.pdf
- supplementary_material/figs-refjra55/maps/rank/rank_hadgem3_gc31_mm_r1i1p1f3_wrt_jra55_nh_1979-2005.pdf
- supplementary_material/figs-refjra55/maps/rank/rank_bcc_csm1_1_r1i1p1_wrt_jra55_nh_1979-2005.pdf
- supplementary_material/figs-refjra55/maps/rank/rank_ipsl_cm6a_lr_r1i1p1f1_wrt_jra55_nh_1979-2005.pdf
- supplementary_material/figs-refjra55/maps/rank/rank_mpi_esm_1_2_ham_r1i1p1f1_wrt_jra55_nh_1979-2005.pdf
- supplementary_material/figs-refjra55/maps/mae/
- supplementary_material/figs-refjra55/maps/mae/MAE_mpi_esm_mr_r1i1p1_wrt_jra55_nh_1979-2005.pdf
- supplementary_material/figs-refjra55/maps/mae/MAE_miroc_es2l_r5i1p1f2_wrt_jra55_nh_1979-2005.pdf
- supplementary_material/figs-refjra55/maps/mae/MAE_miroc6_r3i1p1f1_wrt_jra55_nh_1979-2005.pdf
- supplementary_material/figs-refjra55/maps/mae/MAE_mpi_esm_lr_r1i1p1_wrt_jra55_nh_1979-2005.pdf
- supplementary_material/figs-refjra55/maps/mae/MAE_ec_earth3_veg_lr_r1i1p1f1_wrt_jra55_nh_1979-2005.pdf
- supplementary_material/figs-refjra55/maps/mae/MAE_ipsl_cm5a_mr_r1i1p1_wrt_jra55_nh_1979-2005.pdf
- supplementary_material/figs-refjra55/maps/mae/MAE_cmcc_cm2_sr5_r1i1p1f1_wrt_jra55_nh_1979-2005.pdf
- supplementary_material/figs-refjra55/maps/mae/MAE_cmcc_cm_r1i1p1_wrt_jra55_nh_1979-2005.pdf
- supplementary_material/figs-refjra55/maps/mae/MAE_giss_e2_r_r6i1p1_wrt_jra55_nh_1979-2005.pdf
- supplementary_material/figs-refjra55/maps/mae/MAE_noresm2_lm_r1i1p1f1_wrt_jra55_nh_1979-2005.pdf
- supplementary_material/figs-refjra55/maps/mae/MAE_mpi_esm_1_2_ham_r1i1p1f1_wrt_jra55_nh_1979-2005.pdf
- supplementary_material/figs-refjra55/maps/mae/MAE_iitm_esm_r1i1p1f1_wrt_jra55_nh_1979-2005.pdf
- supplementary_material/figs-refjra55/maps/mae/MAE_hadgem2_cc_r1i1p1_wrt_jra55_nh_1979-2005.pdf
- supplementary_material/figs-refjra55/maps/mae/MAE_access_esm1_5_r1i1p1f1_wrt_jra55_nh_1979-2005.pdf
- supplementary_material/figs-refjra55/maps/mae/MAE_hadgem3_gc31_mm_r1i1p1f3_wrt_jra55_nh_1979-2005.pdf
- supplementary_material/figs-refjra55/maps/mae/MAE_sam0_unicon_r1i1p1f1_wrt_jra55_nh_1979-2005.pdf
- supplementary_material/figs-refjra55/maps/mae/MAE_cnrm_cm5_r1i1p1_wrt_jra55_nh_1979-2005.pdf
- supplementary_material/figs-refjra55/maps/mae/MAE_ec_earth3_aerchem_r1i1p1f1_wrt_jra55_nh_1979-2005.pdf
- supplementary_material/figs-refjra55/maps/mae/MAE_hadgem2_es_r1i1p1_wrt_jra55_nh_1979-2005.pdf
- supplementary_material/figs-refjra55/maps/mae/MAE_bcc_csm2_mr_r1i1p1f1_wrt_jra55_nh_1979-2005.pdf
- supplementary_material/figs-refjra55/maps/mae/MAE_awi_esm_1_1_lr_r1i1p1f1_wrt_jra55_nh_1979-2005.pdf
- supplementary_material/figs-refjra55/maps/mae/MAE_bcc_csm1_1_r1i1p1_wrt_jra55_nh_1979-2005.pdf
- supplementary_material/figs-refjra55/maps/mae/MAE_cmcc_esm2_r1i1p1f1_wrt_jra55_nh_1979-2005.pdf
- supplementary_material/figs-refjra55/maps/mae/MAE_ec_earth3_cc_r1i1p1f1_wrt_jra55_nh_1979-2005.pdf
- supplementary_material/figs-refjra55/maps/mae/MAE_csiro_mk3_6_0_r1i1p1_wrt_jra55_nh_1979-2005.pdf
- supplementary_material/figs-refjra55/maps/mae/MAE_gfdl_cm3_r1i1p1_wrt_jra55_nh_1979-2005.pdf
- supplementary_material/figs-refjra55/maps/mae/MAE_access13_r1i1p1_wrt_jra55_nh_1979-2005.pdf
- supplementary_material/figs-refjra55/maps/mae/MAE_ec_earth3_veg_r1i1p1f1_wrt_jra55_nh_1979-2005.pdf
- supplementary_material/figs-refjra55/maps/mae/MAE_cnrm_esm2_1_r1i1p1f2_wrt_jra55_nh_1979-2005.pdf
- supplementary_material/figs-refjra55/maps/mae/MAE_ccsm4_r6i1p1_wrt_jra55_nh_1979-2005.pdf
- supplementary_material/figs-refjra55/maps/mae/MAE_access_cm2_r1i1p1f1_wrt_jra55_nh_1979-2005.pdf
- supplementary_material/figs-refjra55/maps/mae/MAE_mpi_esm_1_2_lr_r1i1p1f1_wrt_jra55_nh_1979-2005.pdf
- supplementary_material/figs-refjra55/maps/mae/MAE_kiost_esm_r1i1p1f1_wrt_jra55_nh_1979-2005.pdf
- supplementary_material/figs-refjra55/maps/mae/MAE_noresm1_m_r1i1p1_wrt_jra55_nh_1979-2005.pdf
- supplementary_material/figs-refjra55/maps/mae/MAE_mri_esm2_0_r1i1p1f1_wrt_jra55_nh_1979-2005.pdf
- supplementary_material/figs-refjra55/maps/mae/MAE_access10_r1i1p1_wrt_jra55_nh_1979-2005.pdf
- supplementary_material/figs-refjra55/maps/mae/MAE_nesm3_r1i1p1f1_wrt_jra55_nh_1979-2005.pdf
- supplementary_material/figs-refjra55/maps/mae/MAE_inm_cm4_r1i1p1_wrt_jra55_nh_1979-2005.pdf
- supplementary_material/figs-refjra55/maps/mae/MAE_canesm2_r1i1p1_wrt_jra55_nh_1979-2005.pdf
- supplementary_material/figs-refjra55/maps/mae/MAE_giss_e2_h_r6i1p1_wrt_jra55_nh_1979-2005.pdf
- supplementary_material/figs-refjra55/maps/mae/MAE_miroc5_r1i1p1_wrt_jra55_nh_1979-2005.pdf
- supplementary_material/figs-refjra55/maps/mae/MAE_mpi_esm_1_2_hr_r1i1p1f1_wrt_jra55_nh_1979-2005.pdf
- supplementary_material/figs-refjra55/maps/mae/MAE_noresm2_mm_r1i1p1f1_wrt_jra55_nh_1979-2005.pdf
- supplementary_material/figs-refjra55/maps/mae/MAE_ipsl_cm6a_lr_r1i1p1f1_wrt_jra55_nh_1979-2005.pdf
- supplementary_material/figs-refjra55/maps/mae/MAE_ipsl_cm5a_lr_r1i1p1_wrt_jra55_nh_1979-2005.pdf
- supplementary_material/figs-refjra55/maps/mae/MAE_mri_esm1_r1i1p1_wrt_jra55_nh_1979-2005.pdf
- supplementary_material/figs-refjra55/maps/mae/MAE_giss_e2_1_g_r1i1p1f1_wrt_jra55_nh_1979-2005.pdf
- supplementary_material/figs-refjra55/maps/mae/MAE_cnrm_cm6_1_r1i1p1f2_wrt_jra55_nh_1979-2005.pdf
- supplementary_material/figs-refjra55/maps/mae/MAE_fgoals_g3_r3i1p1f1_wrt_jra55_nh_1979-2005.pdf
- supplementary_material/figs-refjra55/maps/mae/MAE_ec_earth_r12i1p1_wrt_jra55_nh_1979-2005.pdf
- supplementary_material/figs-refjra55/maps/mae/MAE_gfdl_cm4_r1i1p1f1_wrt_jra55_nh_1979-2005.pdf
- supplementary_material/figs-refjra55/maps/mae/MAE_cnrm_cm6_1_hr_r1i1p1f2_wrt_jra55_nh_1979-2005.pdf
- supplementary_material/figs-refjra55/maps/mae/MAE_miroc_esm_r1i1p1_wrt_jra55_nh_1979-2005.pdf
- supplementary_material/figs-refjra55/maps/mae/MAE_taiesm1_r1i1p1f1_wrt_jra55_nh_1979-2005.pdf
- supplementary_material/figs-refjra55/maps/mae/MAE_ec_earth3_r1i1p1f1_wrt_jra55_nh_1979-2005.pdf
- supplementary_material/figs-refjra55/maps/mae/MAE_fgoals_g2_r1i1p1_wrt_jra55_nh_1979-2005.pdf
- supplementary_material/rank_csiro_mk3_6_0_r1i1p1_wrt_interim_nh_1979-2005.pdf
- gmd-15-1375-2022-supplement-title-page.pdf
