# Supplementary material for: A circulation-based performance atlas of the CMIP5 and 6 models for regional climate studies in the Northern Hemisphere mid-to-high latitudes
Source: Copernicus journal article supplement (doi:10.5194/gmd-15-1375-2022), 2022-02-17
Supplement: Supplementary file 18 [file gmd-15-1375-2022-supplement.zip › gmd-15-1375-2022-supplement-title-page.pdf]

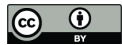

## *Supplement of*

# **A circulation-based performance atlas of the CMIP5 and 6 models for regional climate studies in the Northern Hemisphere mid-to-high latitudes**

**Swen Brands**

*Correspondence to:* Swen Brands ([swen.brands@gmail.com](mailto:swen.brands@gmail.com))

- [gmd-15-1375-2022-supplement-title-page.pdf](#)
- [supplementary\\_material](#)
  - [MAE\\_csiro\\_mk3\\_6\\_0\\_r1i1p1\\_wrt\\_interim\\_nh\\_1979-2005.pdf](#)
  - [figs-refjra55](#)
    - \* [as-figure-11-but-wrt-jra55.pdf](#)
    - \* [maps](#)
    - \* [taylor](#)
  - [rank\\_csiro\\_mk3\\_6\\_0\\_r1i1p1\\_wrt\\_interim\\_nh\\_1979-2005.pdf](#)
  - [readme.txt](#)

The copyright of individual parts of the supplement might differ from the article licence.
