# Supplementary material for: A circulation-based performance atlas of the CMIP5 and 6 models for regional climate studies in the Northern Hemisphere mid-to-high latitudes
Source: Copernicus journal article supplement (doi:10.5194/gmd-15-1375-2022), 2022-02-17
Supplement: Supplementary file 18 [file gmd-15-1375-2022-supplement.zip › supplementary_material/readme.txt]

This archive contains supplementary material to gmd-2020-418:

Brands, S:  A circulation-based performance atlas of the CMIP5 and 6 models for regional climate studies in the northern hemisphere, Geoscientific Model Development, doi: 10.5194/gmd-2020-418


Contents:

MAE_csiro_mk3_6_0_r1i1p1_wrt_interim_nh_1979-2005.pdf: MAE for CSIRO-MK3.6.0 w.r.t. to ERA-Interim, not shown in the manuscript file
rank_csiro_mk3_6_0_r1i1p1_wrt_interim_nh_1979-2005.pdf: Corresponding rank for CSIRO-MK3.6.0, not shown in the manuscript file

In the "ref-jra55" directory:
"maps" subdirectory: Contains model performance maps showing the mean absolute error (MAE) and model rank; as in the article file but with respect to JRA-55 instead of ERA-Interim
"taylor" subdirectory: Contains Taylor diagrams for each of the 27 LWTs; as in the article file but with respect to JRA-55 instead of ERA-Interim 
"as-figure-11-but-wrt-jra55.pdf" file: As Figure 10 in the article file, but for the model evalution against JRA-55 instead of ERA-Interim

contact: swen.brands@gmail.com
