# Supplementary figures and images for: A circulation-based performance atlas of the CMIP5 and 6 models for regional climate studies in the Northern Hemisphere mid-to-high latitudes (part 1 of 2)
Source: Copernicus journal article supplement (doi:10.5194/gmd-15-1375-2022), 2022-02-17

MAE, noresm1\_m, r1i1p1 w.r.t. jra55, 1979-2005, all seasons

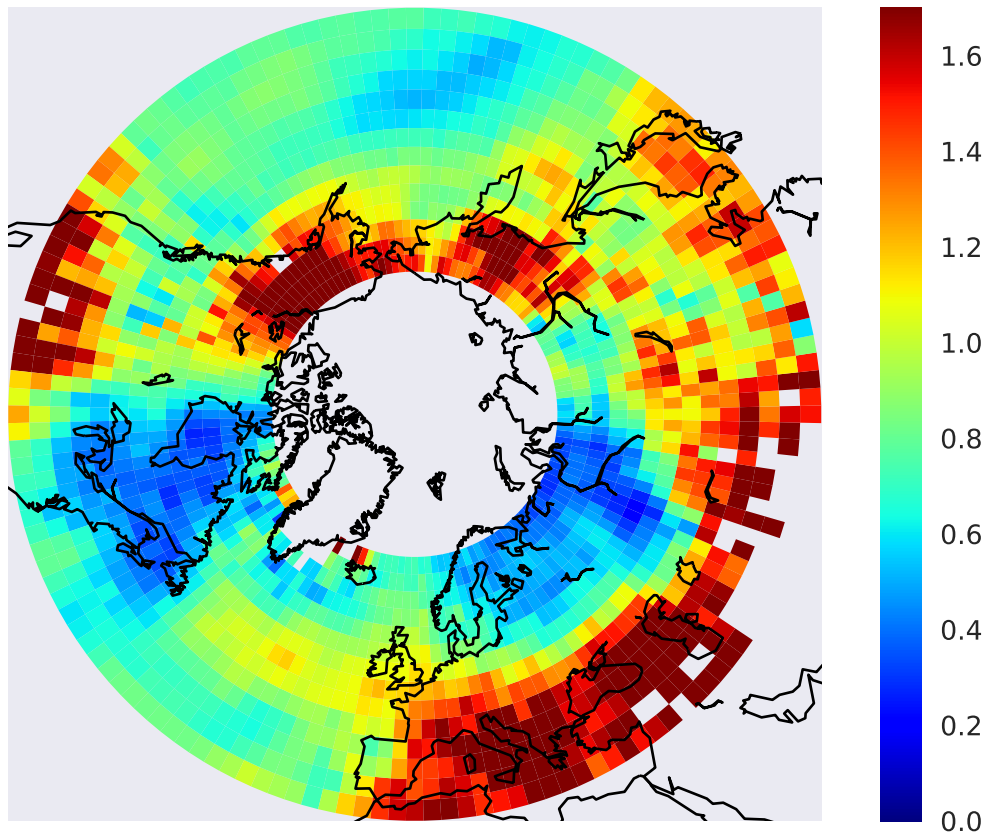

Supplement: Supplementary file 1 [file gmd-15-1375-2022-supplement.zip]

Performance rank for csiro\_mk3\_6\_0, r1i1p1 w.r.t. interim, 1979-2005, all seasons

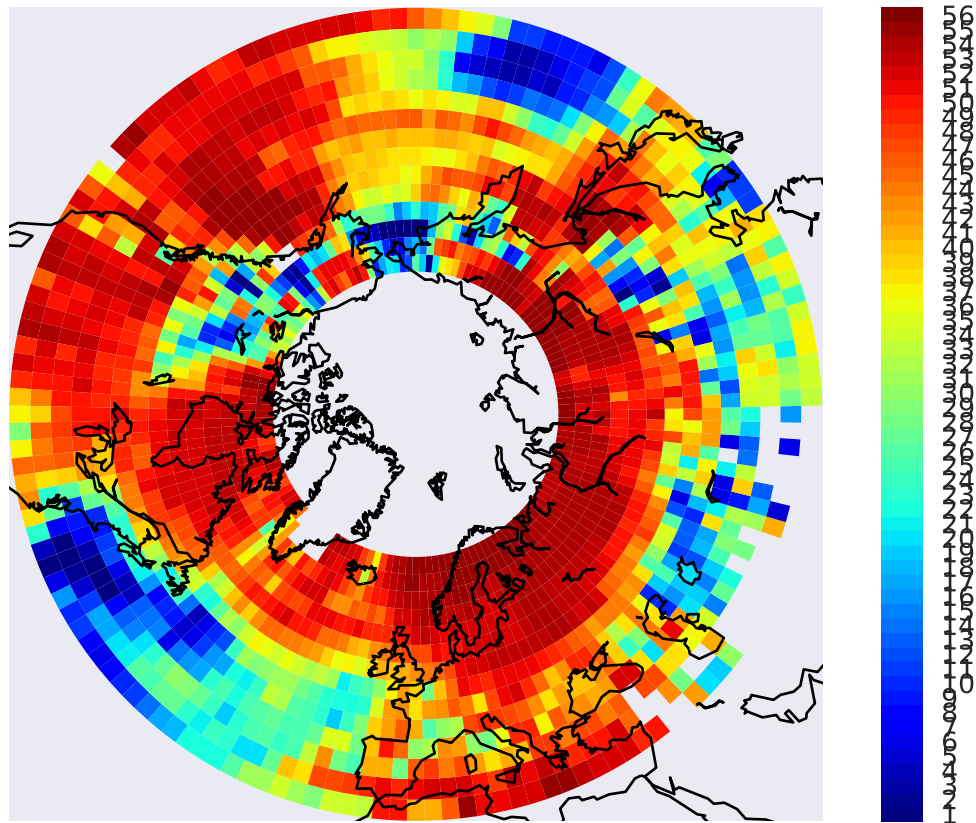

Supplement: Supplementary file 2 [file gmd-15-1375-2022-supplement.zip]

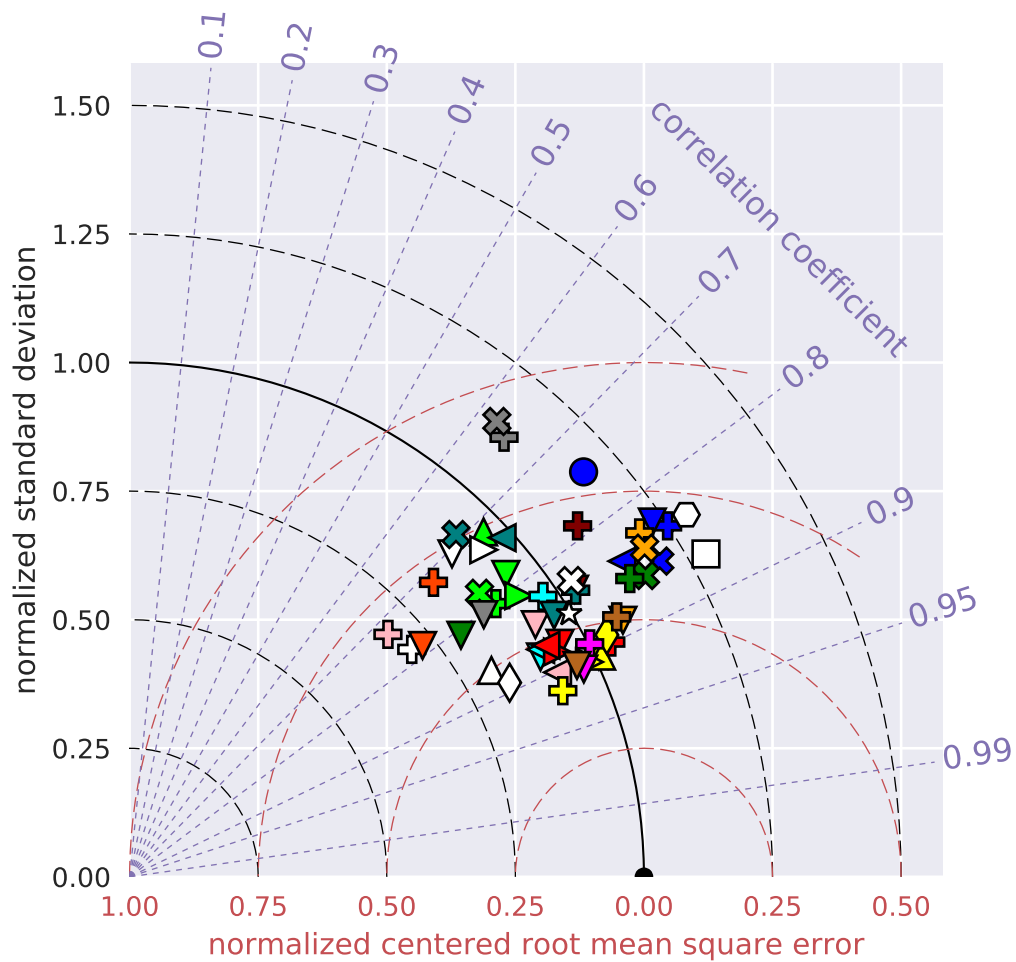

Supplement: Supplementary file 3 [file gmd-15-1375-2022-supplement.zip]

MAE, taiesm1, r1i1p1f1 w.r.t. jra55, 1979-2005, all seasons

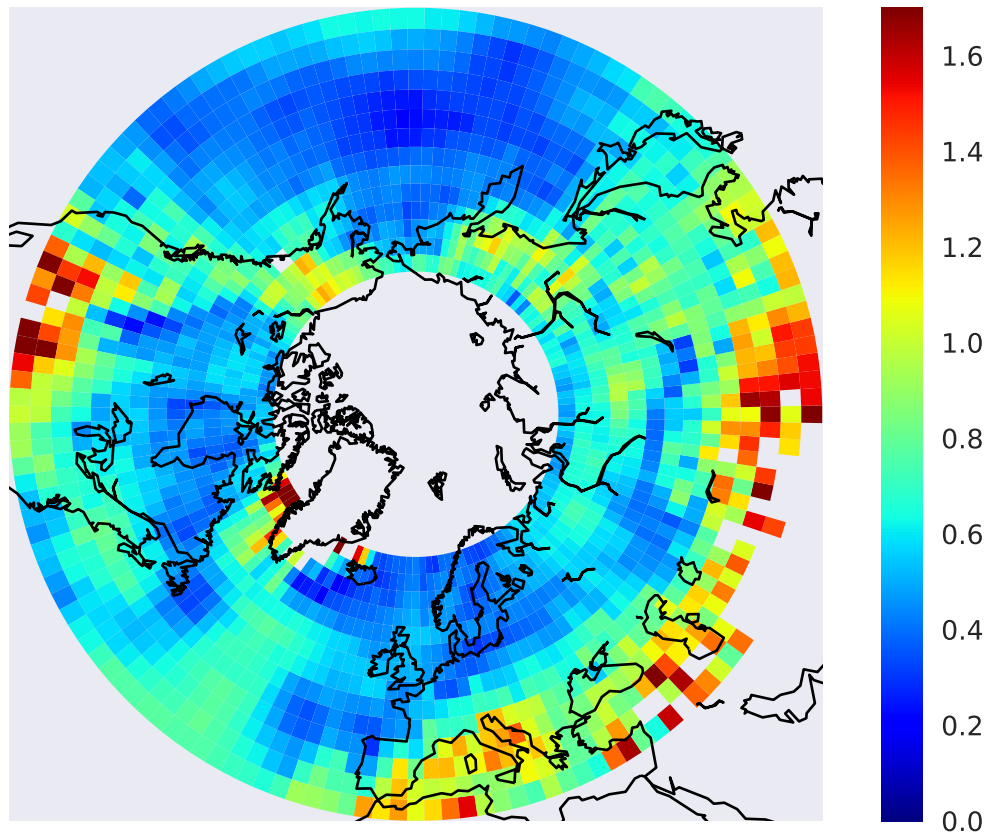

Supplement: Supplementary file 4 [file gmd-15-1375-2022-supplement.zip]

MAE, hadgem2\_cc, rli1p1 w.r.t. jra55, 1979-2005, all seasons

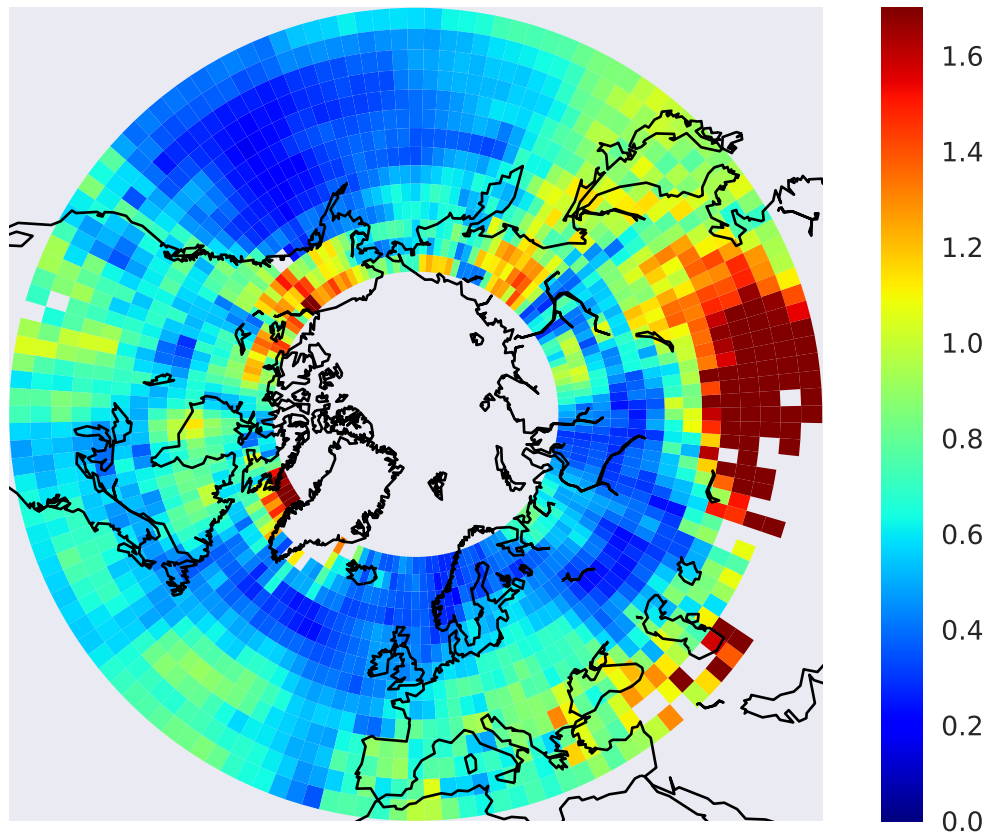

Supplement: Supplementary file 5 [file gmd-15-1375-2022-supplement.zip]

MAE, gfdl\_cm4, rli1p1f1 w.r.t. jra55, 1979-2005, all seasons

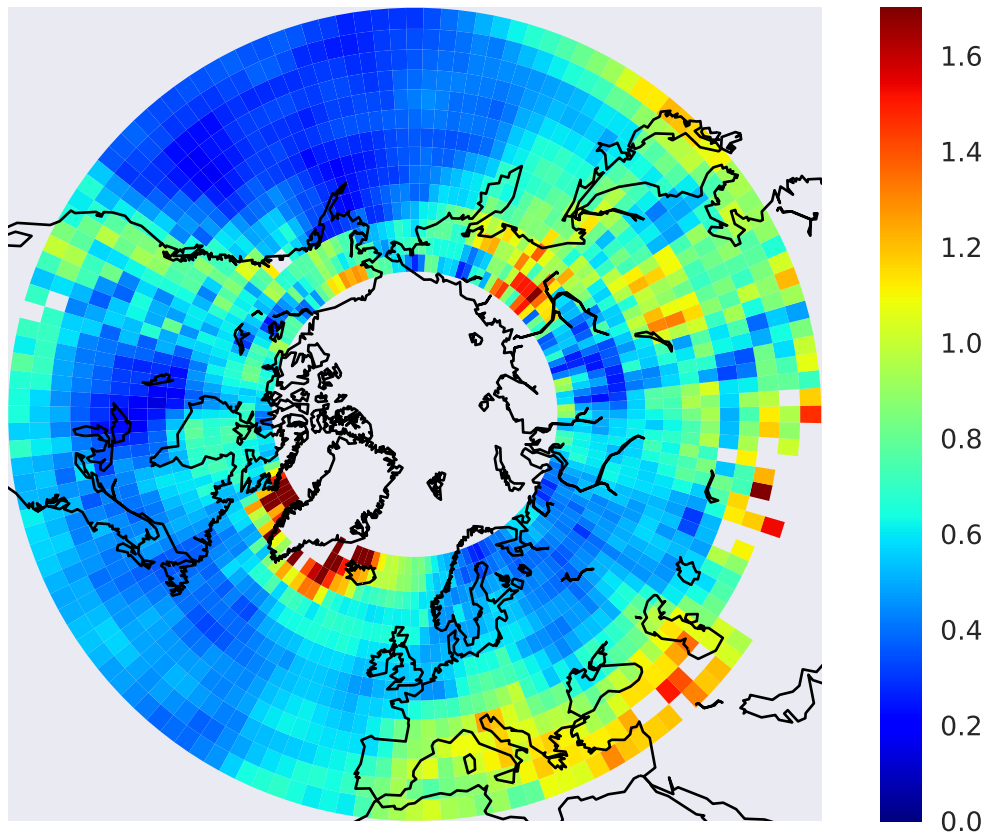

Supplement: Supplementary file 6 [file gmd-15-1375-2022-supplement.zip]

Performance rank for mpi\_esm\_1\_2\_lr, r1i1p1f1 w.r.t. jra55, 1979-2005, all seasons

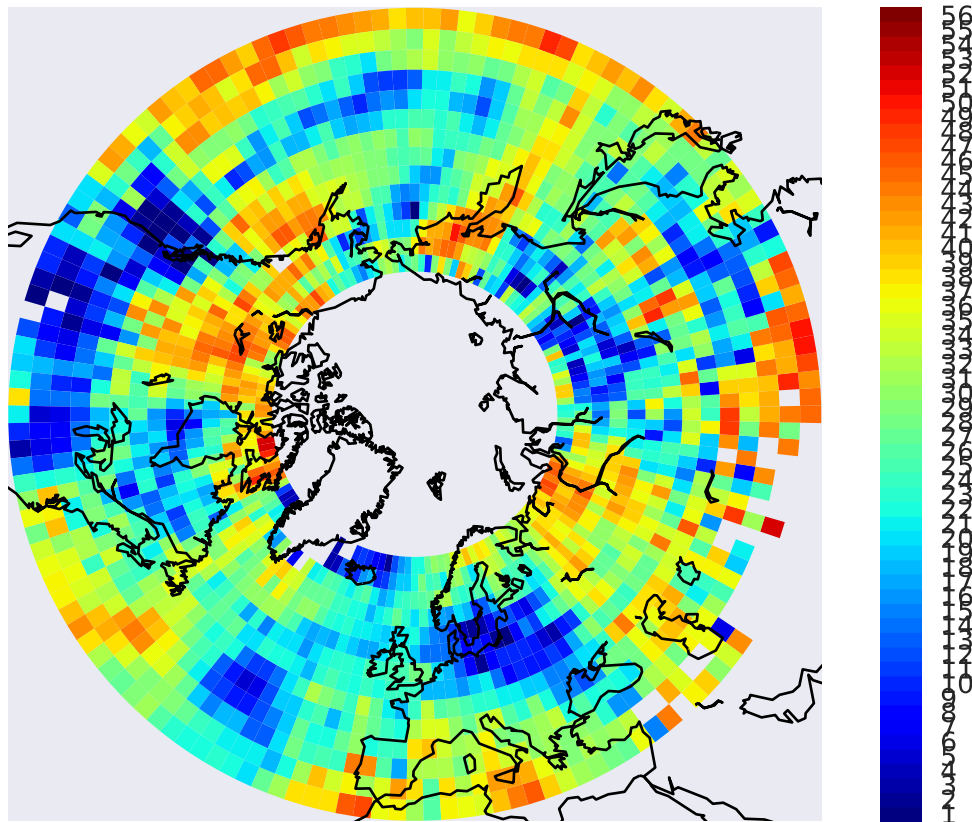

Supplement: Supplementary file 7 [file gmd-15-1375-2022-supplement.zip]

Performance rank for hadgem2\_es, rli1p1 w.r.t. jra55, 1979-2005, all seasons

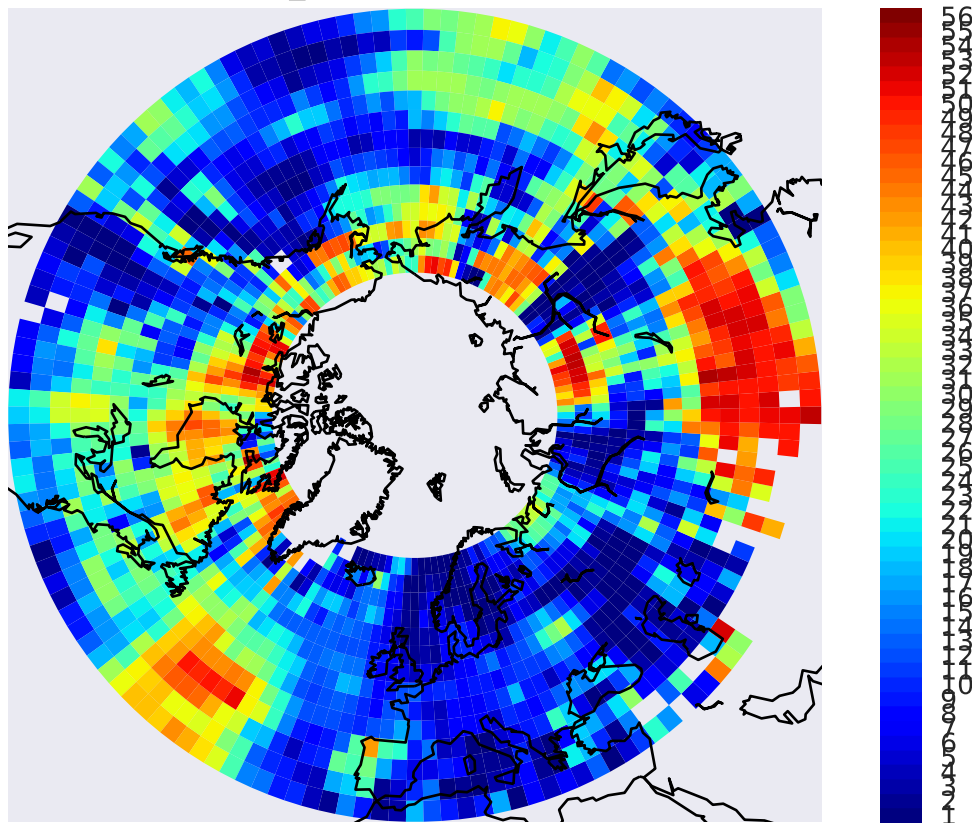

Supplement: Supplementary file 8 [file gmd-15-1375-2022-supplement.zip]

MAE, ec\_earth3\_veg\_lr, r1i1p1f1 w.r.t. jra55, 1979-2005, all seasons

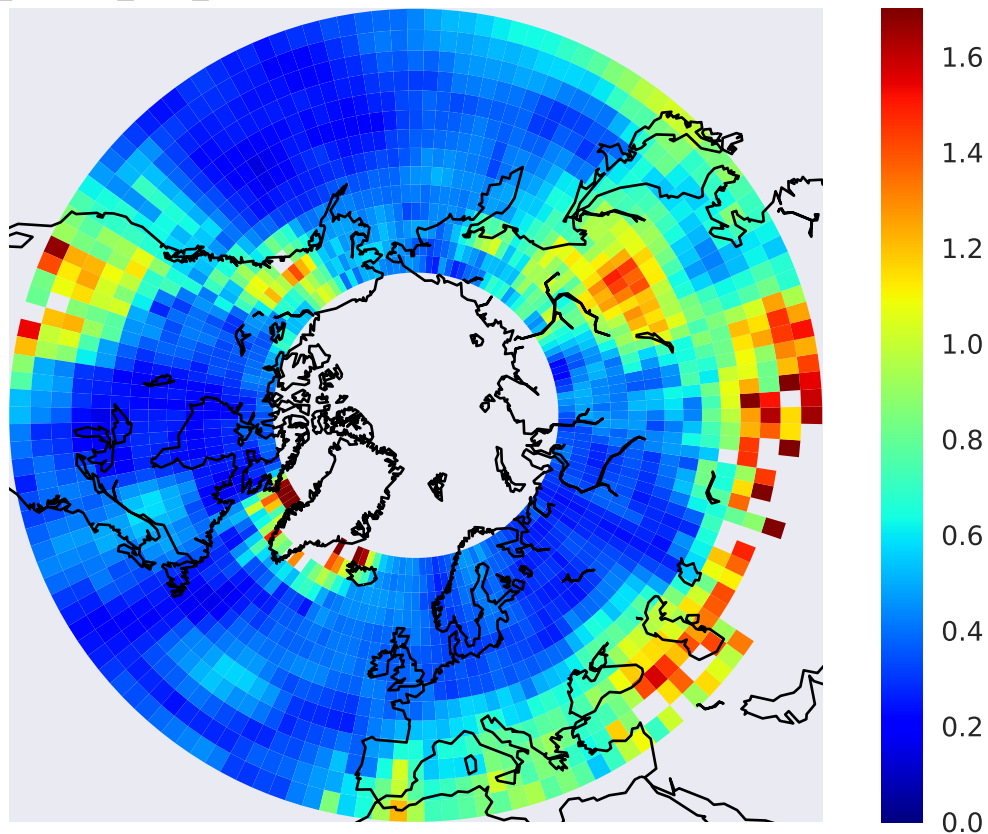

Supplement: Supplementary file 9 [file gmd-15-1375-2022-supplement.zip]

MAE, miroc5, r1i1p1 w.r.t. jra55, 1979-2005, all seasons

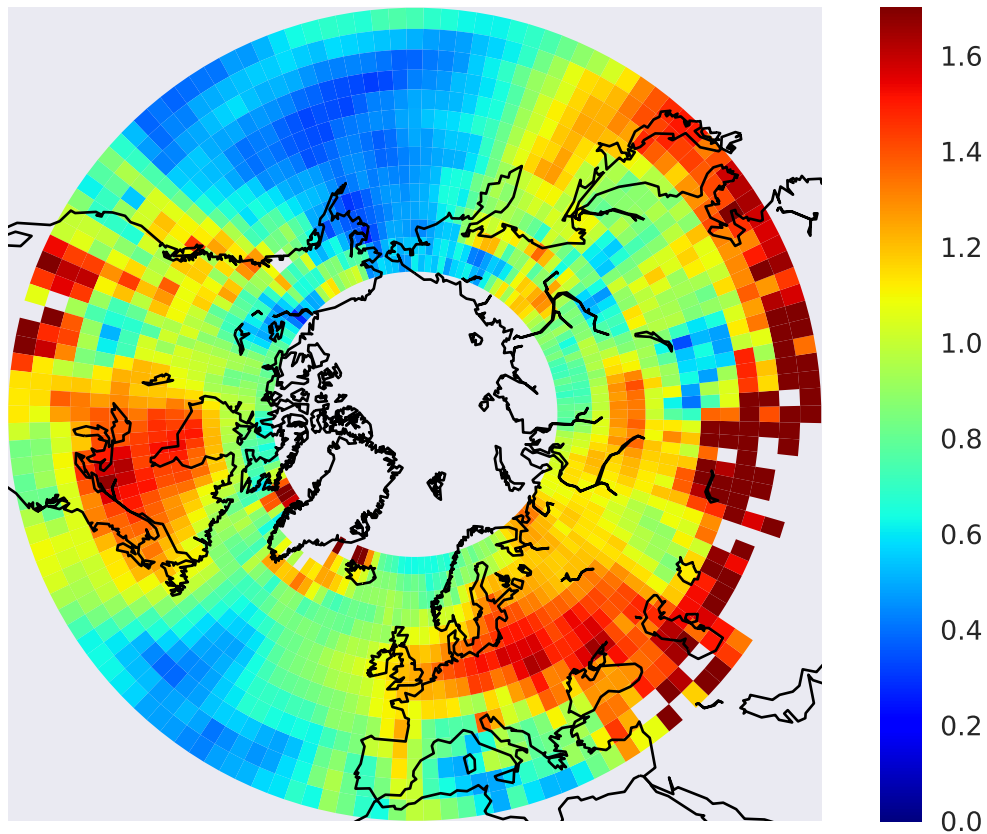

Supplement: Supplementary file 10 [file gmd-15-1375-2022-supplement.zip]

Performance rank for gfdl\_cm3, r1i1p1 w.r.t. jra55, 1979-2005, all seasons

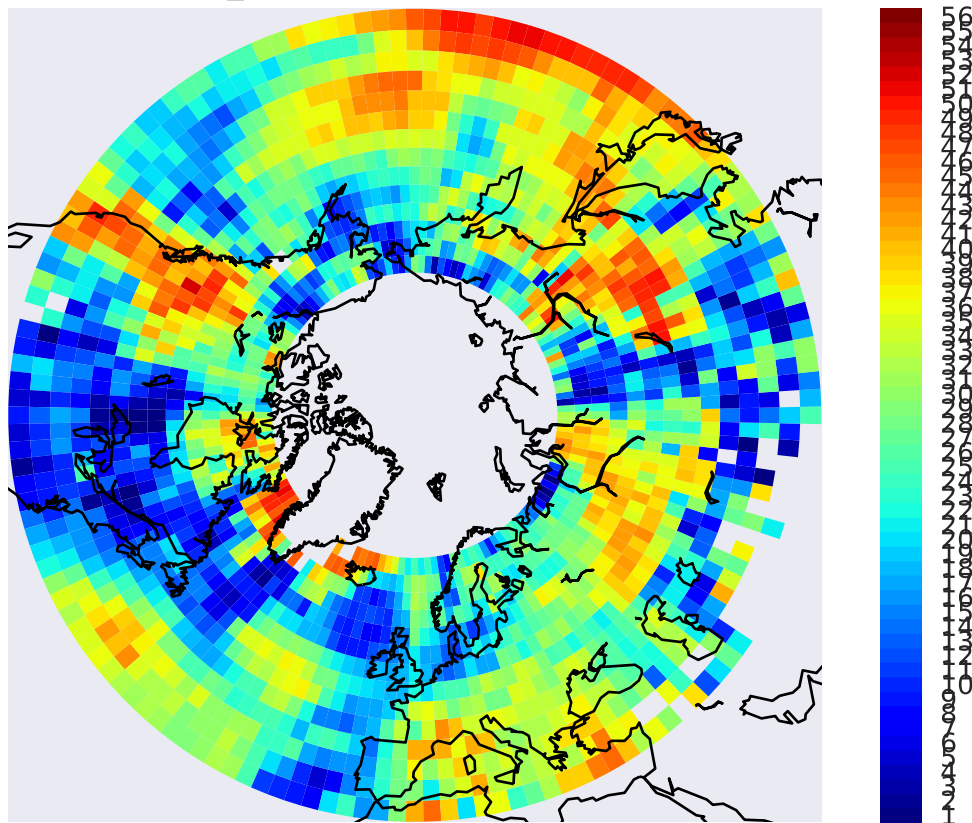

Supplement: Supplementary file 11 [file gmd-15-1375-2022-supplement.zip]

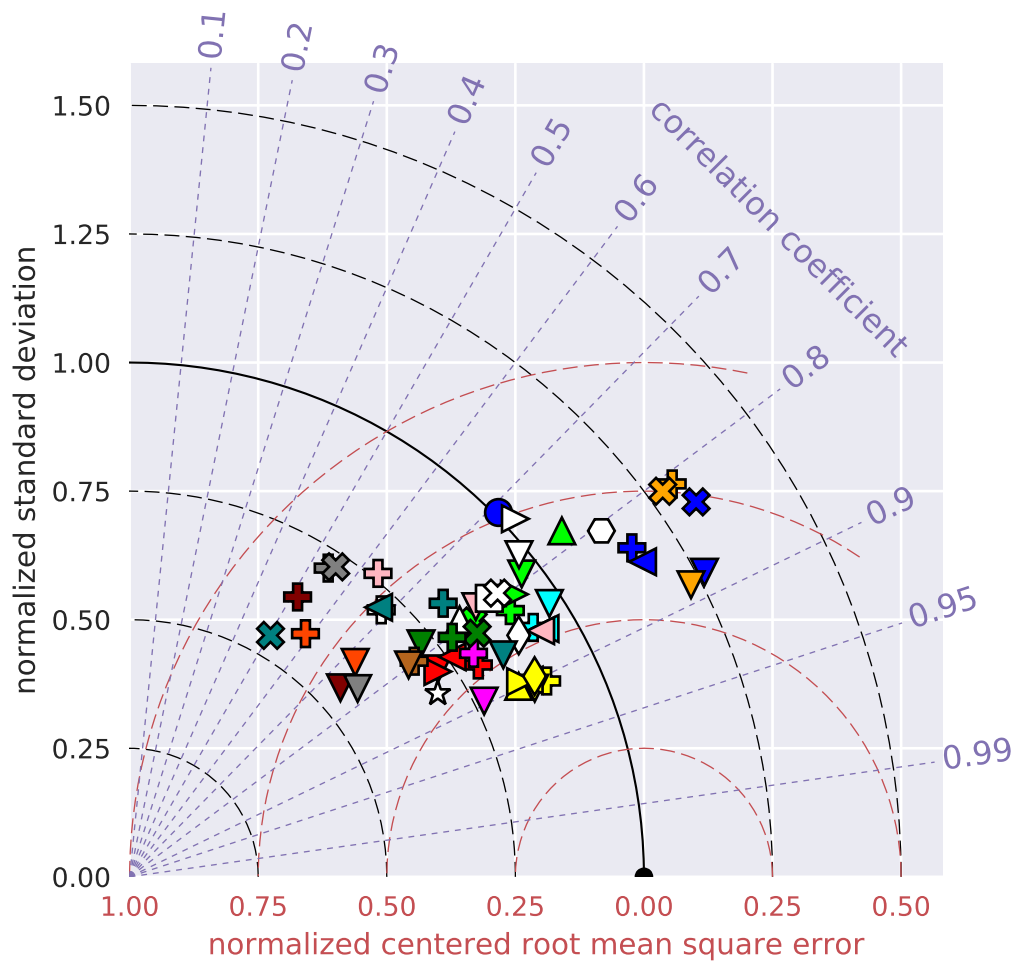

Supplement: Supplementary file 12 [file gmd-15-1375-2022-supplement.zip]

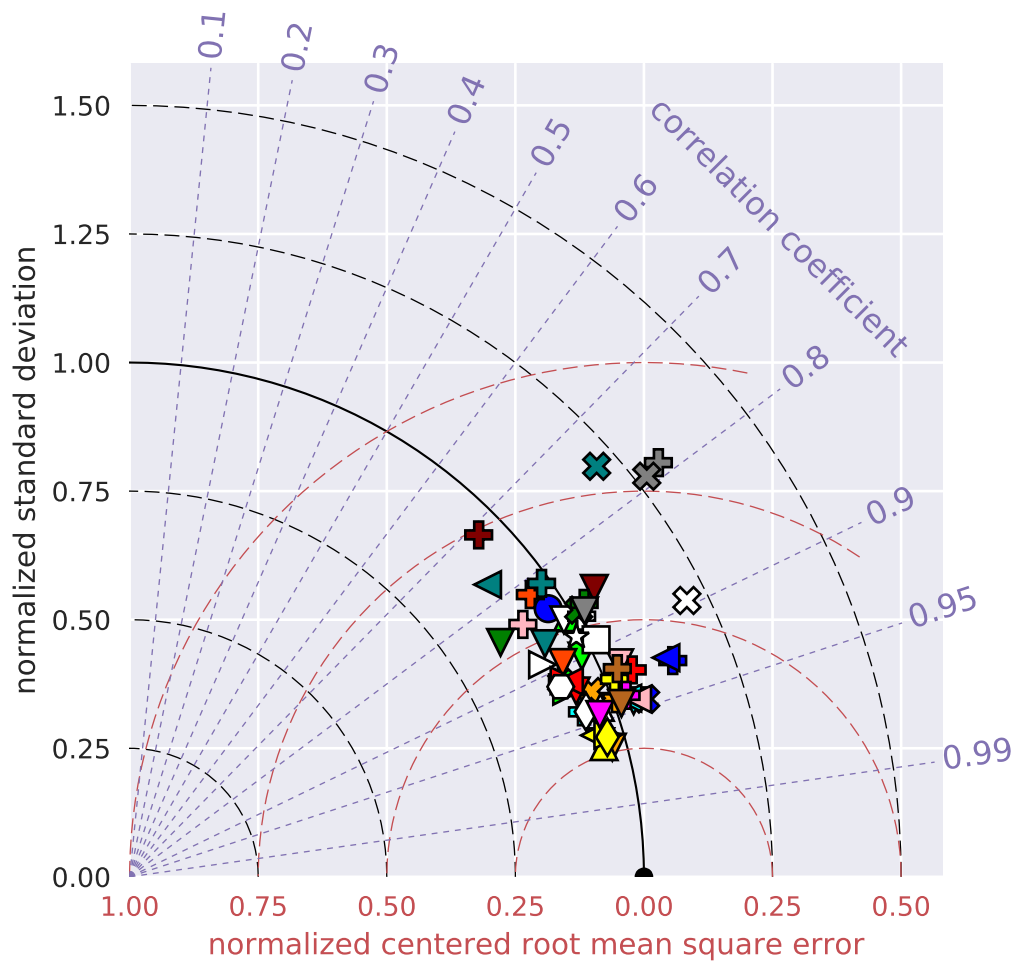

Supplement: Supplementary file 13 [file gmd-15-1375-2022-supplement.zip]

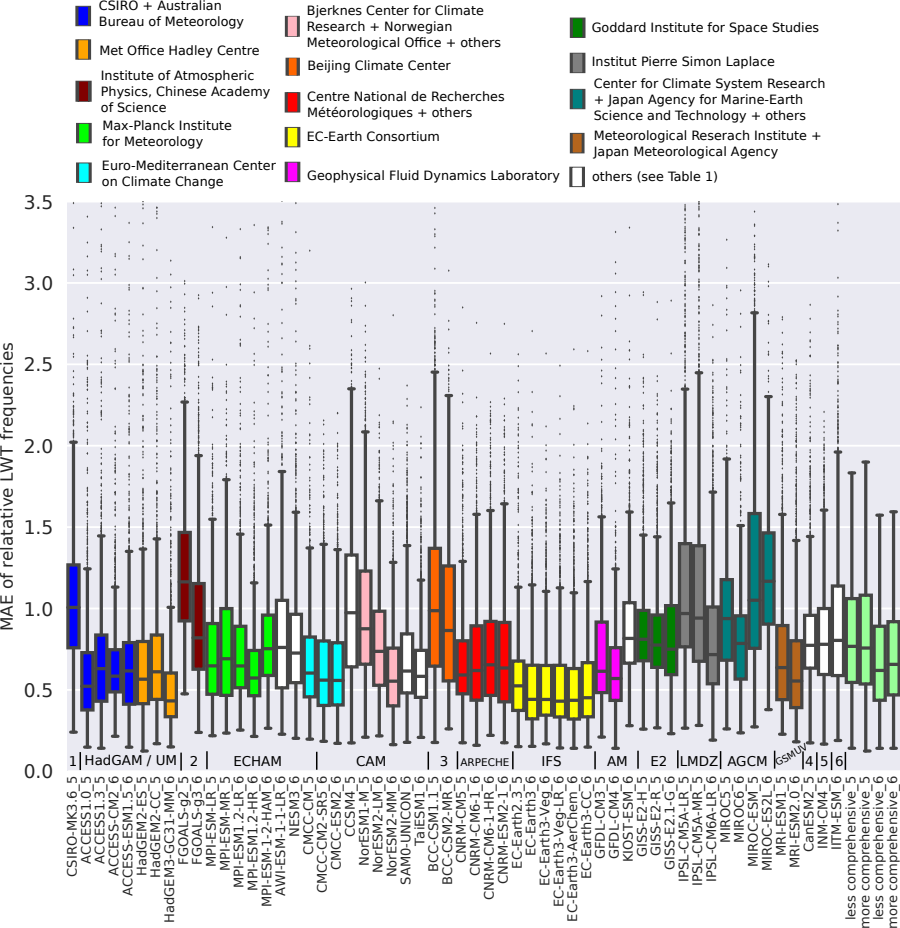

Supplement: Supplementary file 14 [file gmd-15-1375-2022-supplement.zip]

Performance rank for miroc\_es2l, r5i1p1f2 w.r.t. jra55, 1979-2005, all seasons

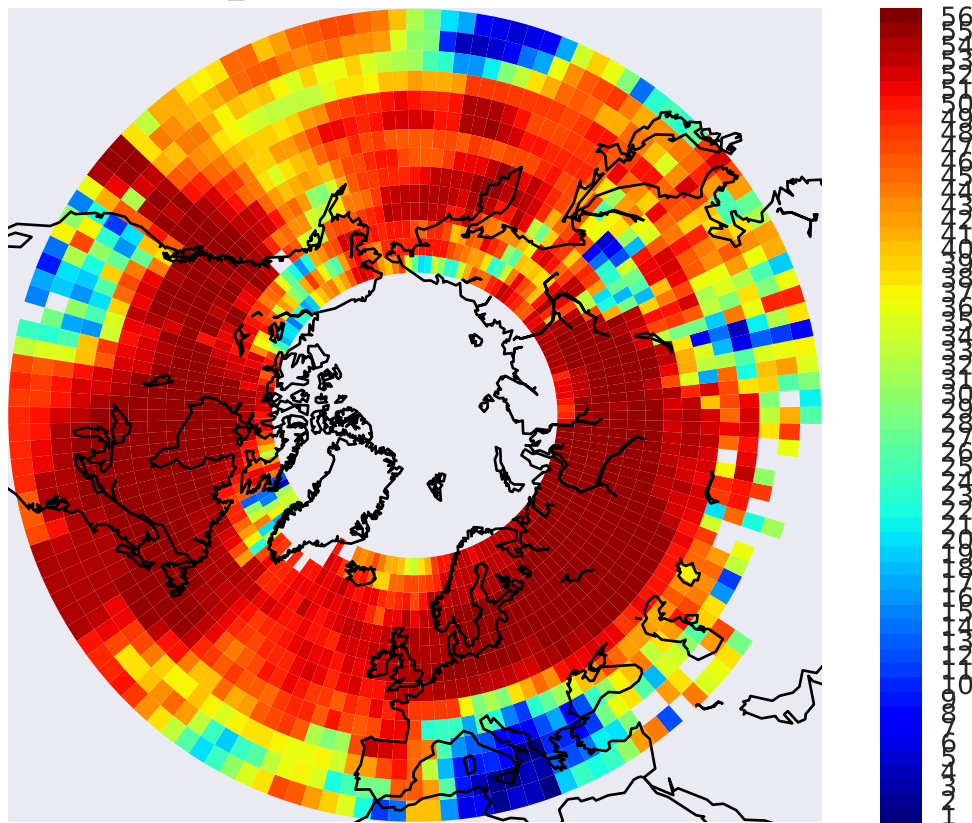

Supplement: Supplementary file 15 [file gmd-15-1375-2022-supplement.zip]

Performance rank for ec\_earth3\_veg, rli1p1f1 w.r.t. jra55, 1979-2005, all seasons

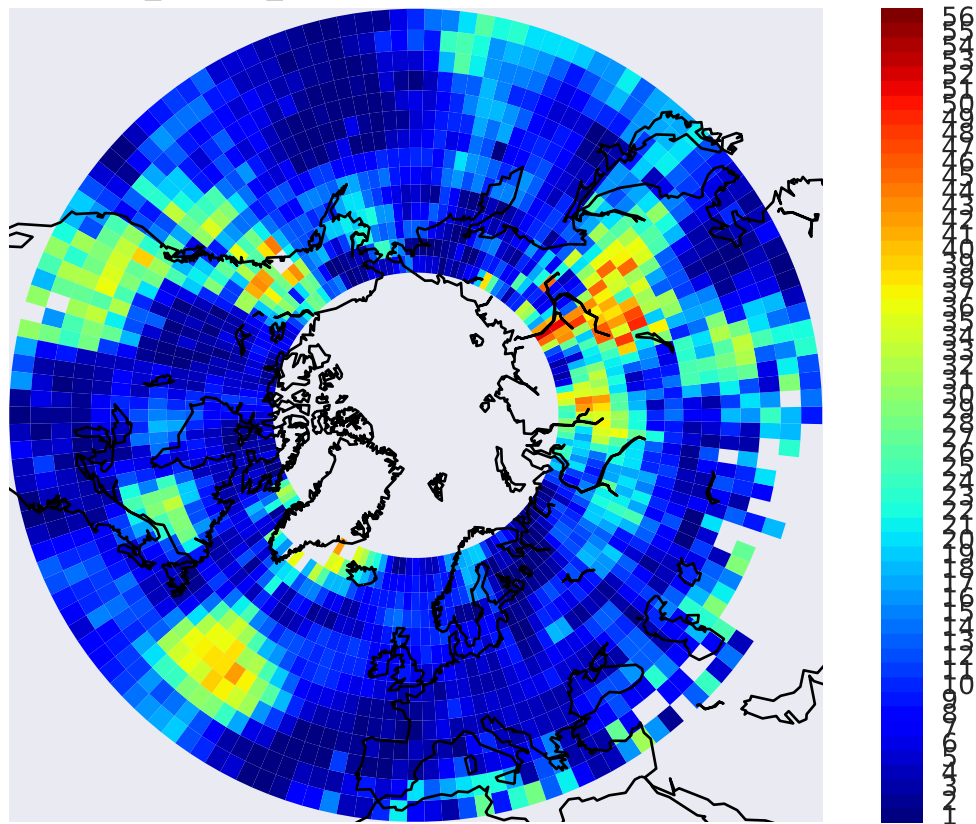

Supplement: Supplementary file 16 [file gmd-15-1375-2022-supplement.zip]

MAE, giss\_e2\_r, r6i1p1 w.r.t. jra55, 1979-2005, all seasons

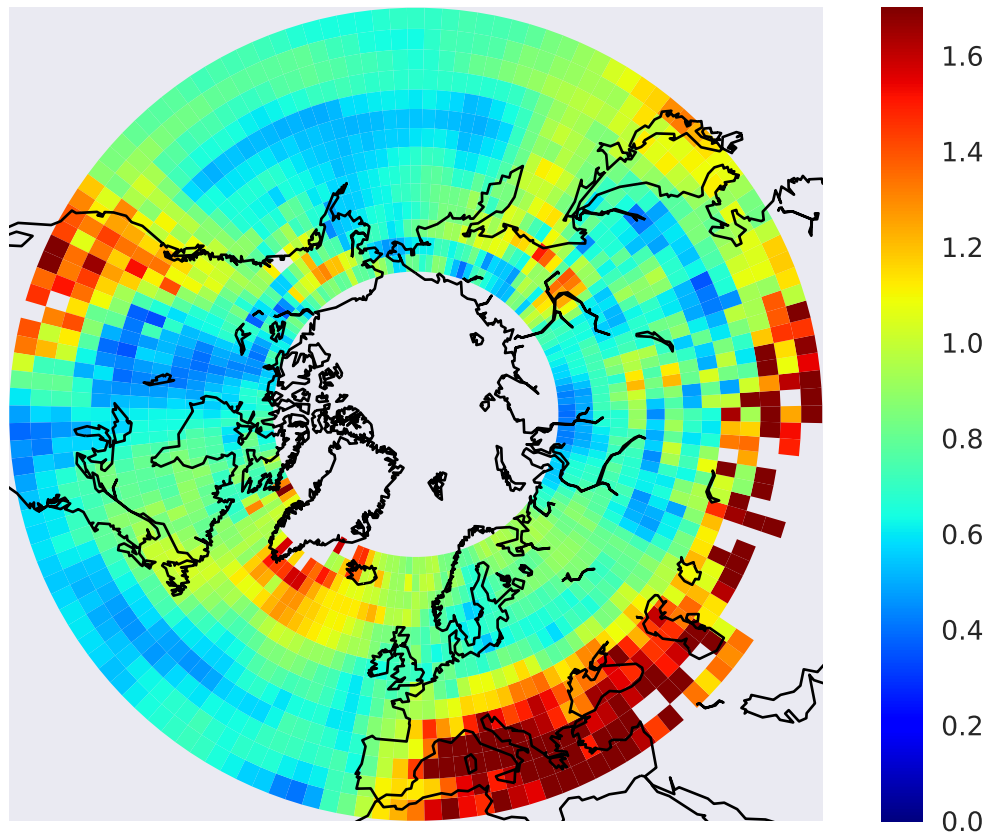

Supplement: Supplementary file 17 [file gmd-15-1375-2022-supplement.zip]

MAE, csiro\_mk3\_6\_0, r1i1p1 w.r.t. interim, 1979-2005, all seasons

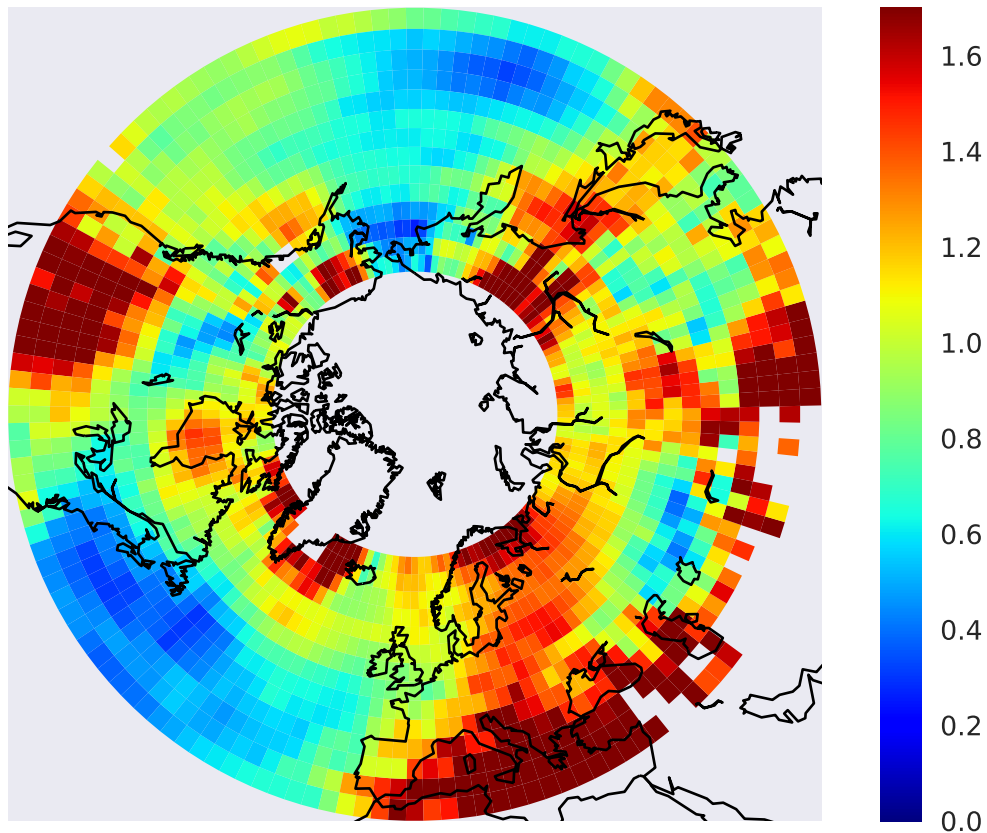

Supplement: Supplementary file 18 [file gmd-15-1375-2022-supplement.zip › supplementary_material/MAE_csiro_mk3_6_0_r1i1p1_wrt_interim_nh_1979-2005.pdf]

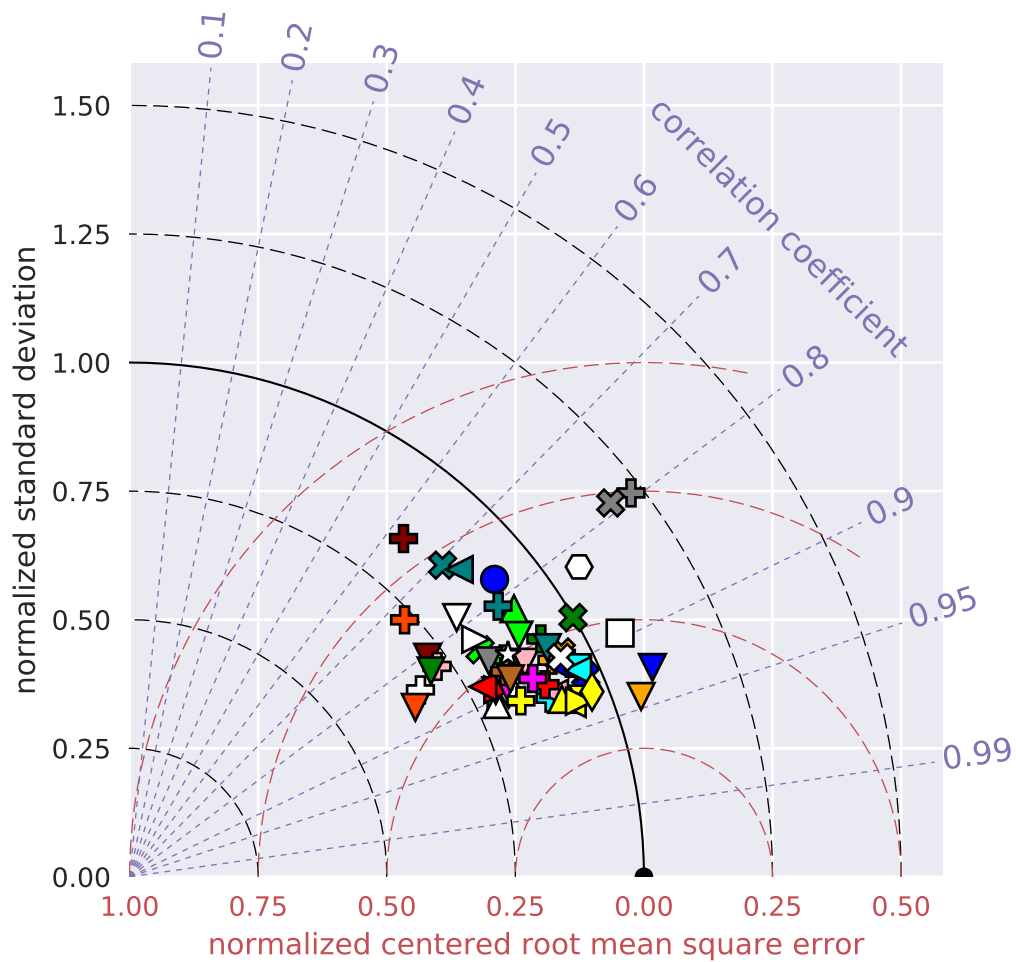

Supplement: Supplementary file 18 [file gmd-15-1375-2022-supplement.zip › supplementary_material/figs-refjra55/taylor/LWT_10_wrt_jra55_nh_1979-2005.pdf]

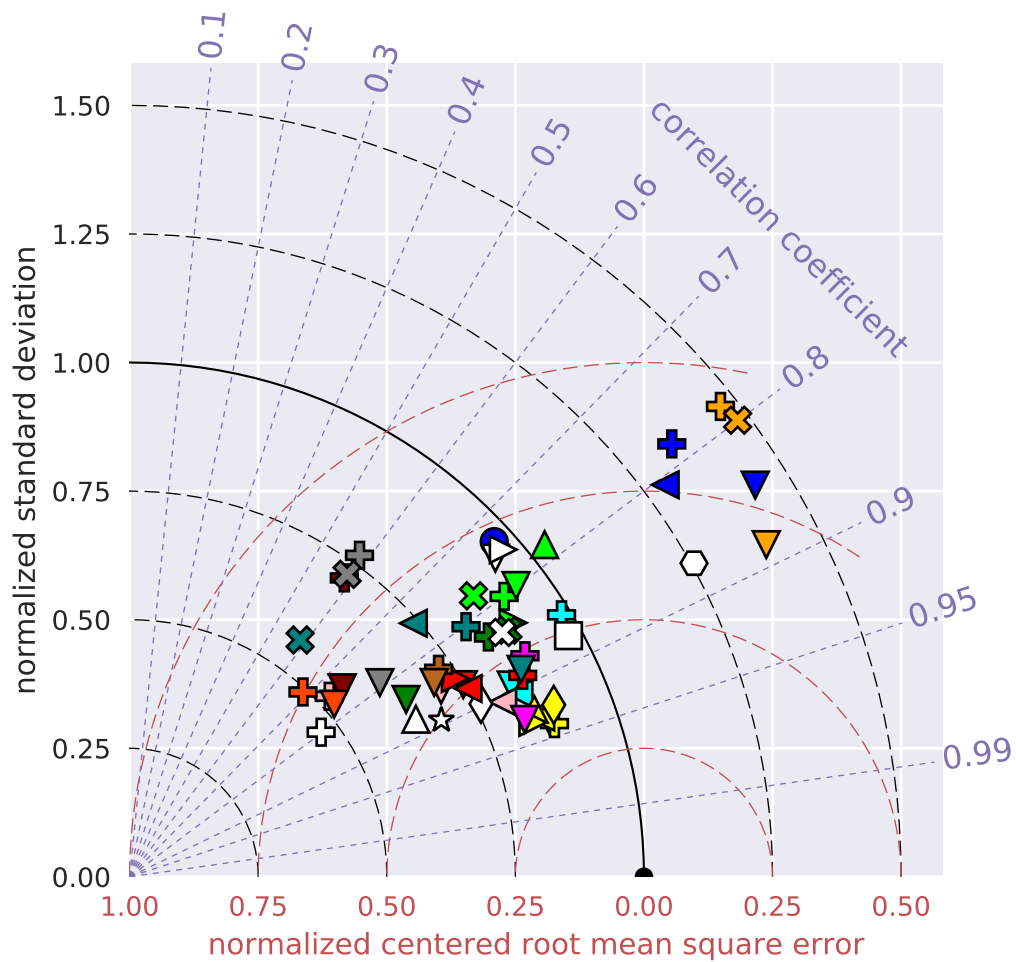

Supplement: Supplementary file 18 [file gmd-15-1375-2022-supplement.zip › supplementary_material/figs-refjra55/taylor/LWT_11_wrt_jra55_nh_1979-2005.pdf]

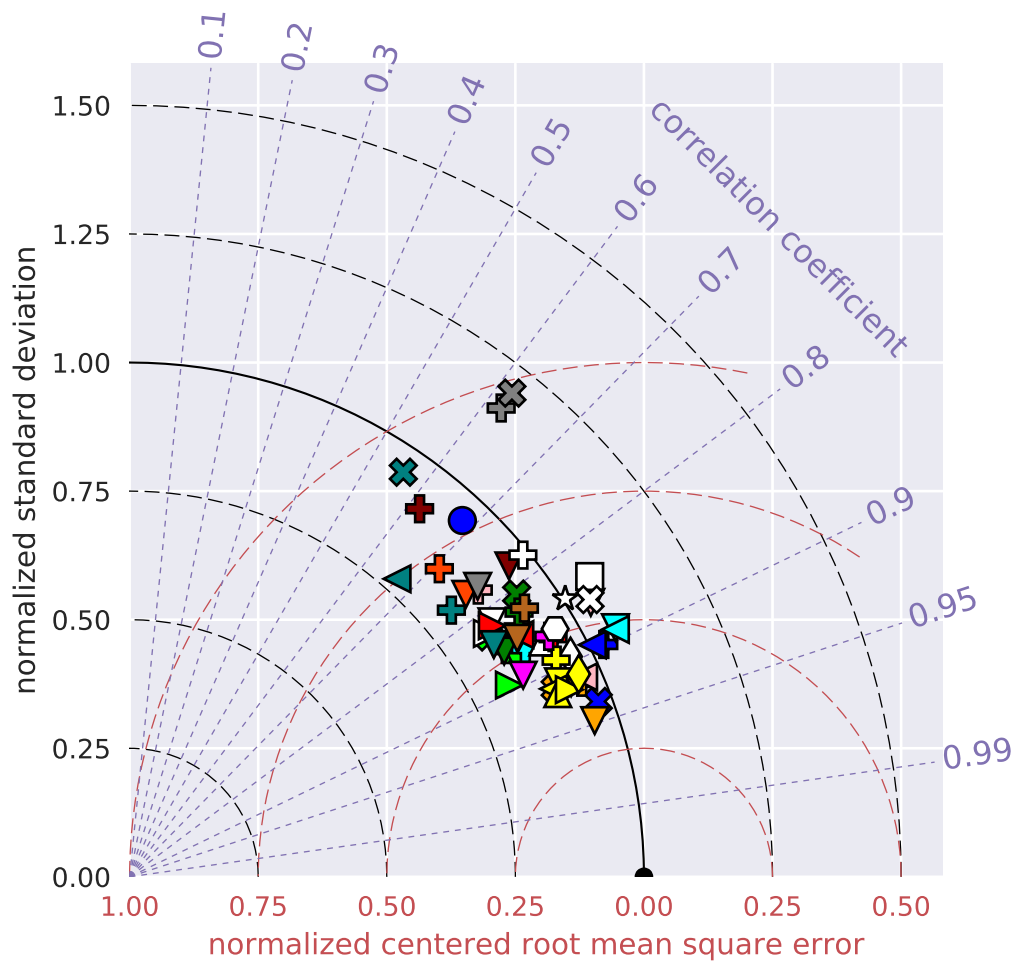

Supplement: Supplementary file 18 [file gmd-15-1375-2022-supplement.zip › supplementary_material/figs-refjra55/taylor/LWT_25_wrt_jra55_nh_1979-2005.pdf]

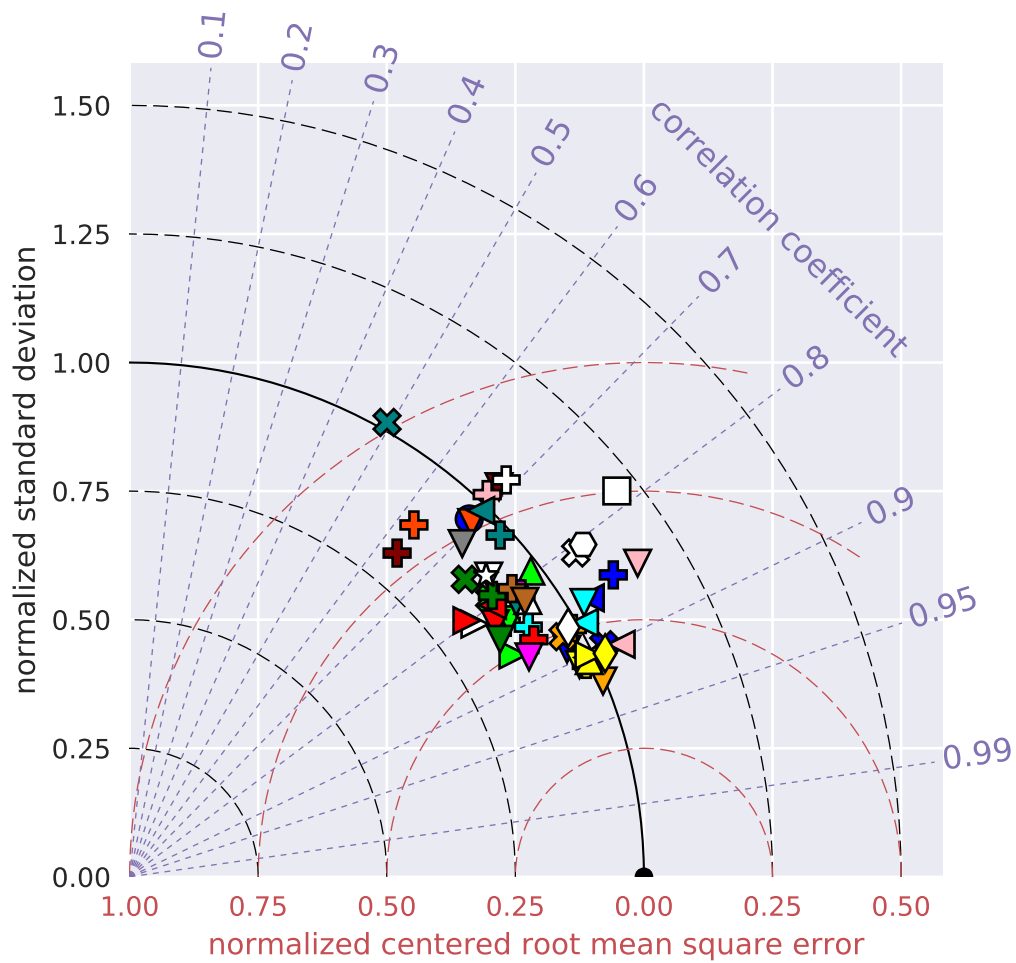

Supplement: Supplementary file 18 [file gmd-15-1375-2022-supplement.zip › supplementary_material/figs-refjra55/taylor/LWT_8_wrt_jra55_nh_1979-2005.pdf]

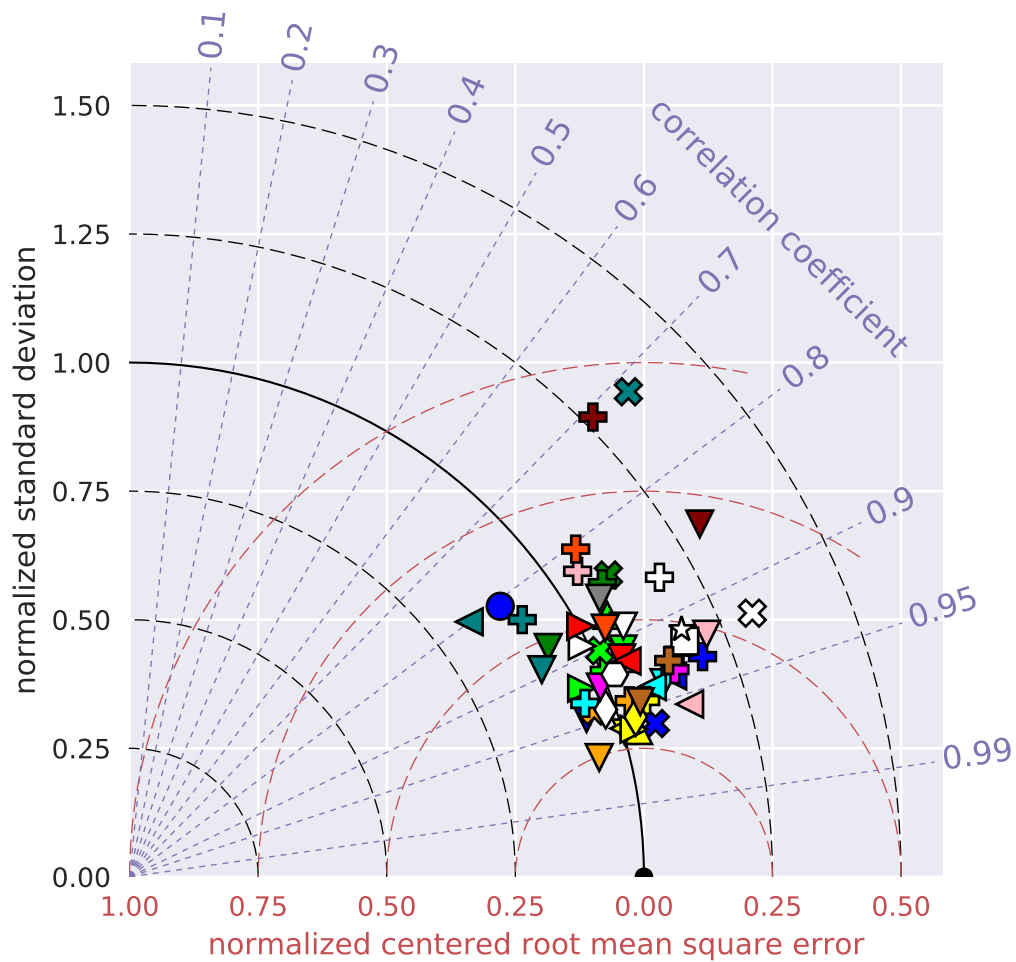

Supplement: Supplementary file 18 [file gmd-15-1375-2022-supplement.zip › supplementary_material/figs-refjra55/taylor/LWT_15_wrt_jra55_nh_1979-2005.pdf]

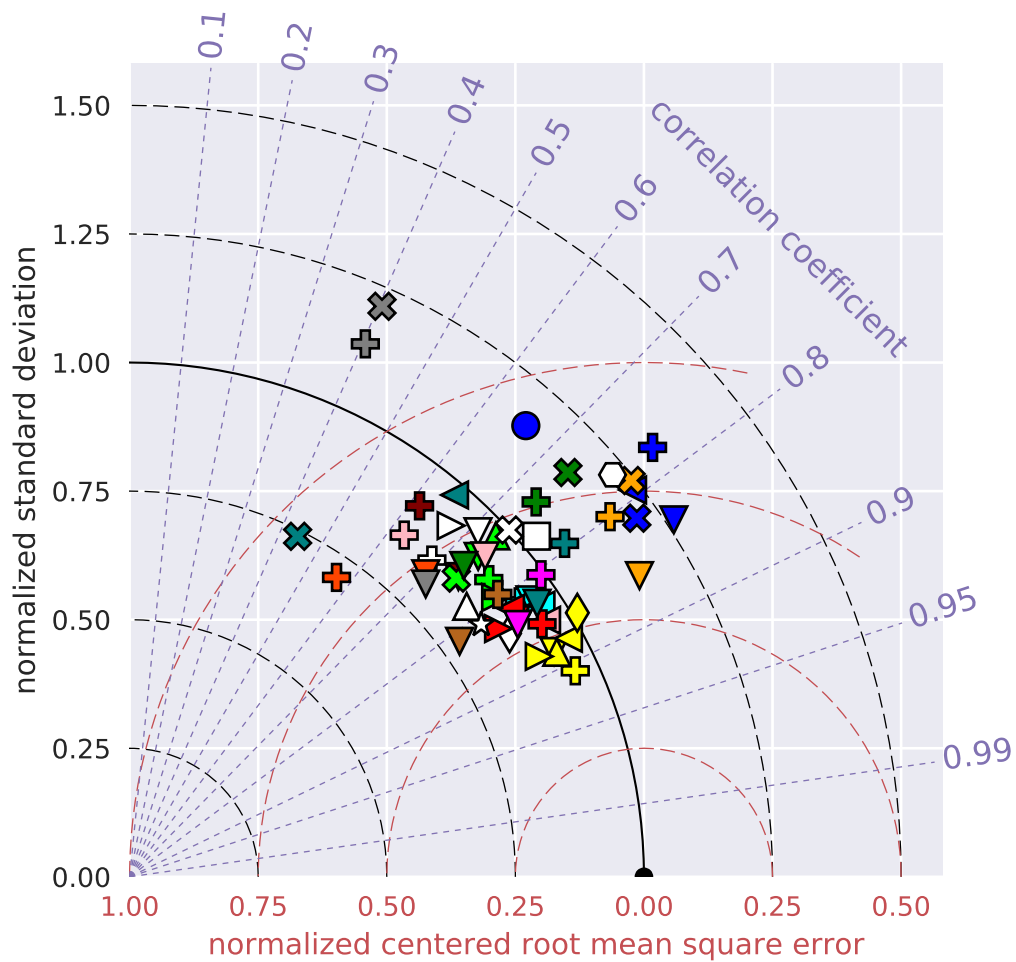

Supplement: Supplementary file 18 [file gmd-15-1375-2022-supplement.zip › supplementary_material/figs-refjra55/taylor/LWT_4_wrt_jra55_nh_1979-2005.pdf]

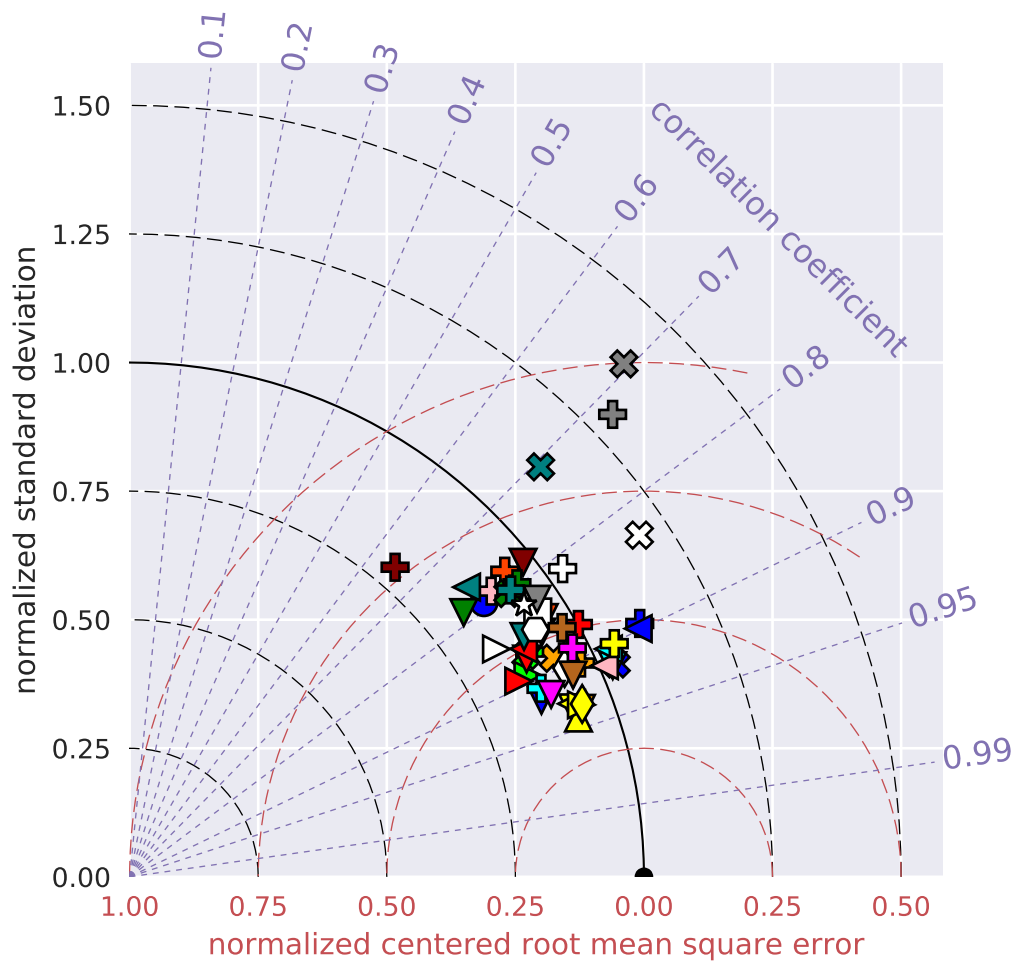

Supplement: Supplementary file 18 [file gmd-15-1375-2022-supplement.zip › supplementary_material/figs-refjra55/taylor/LWT_6_wrt_jra55_nh_1979-2005.pdf]

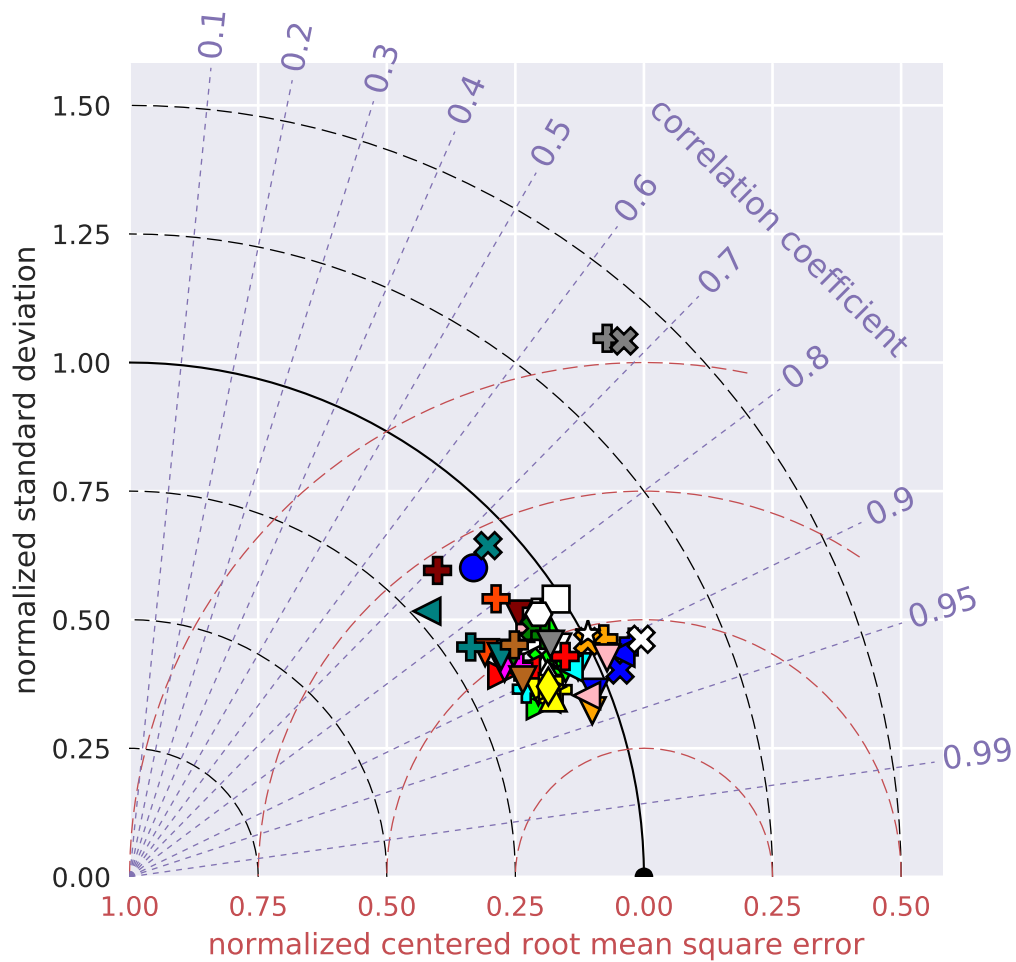

Supplement: Supplementary file 18 [file gmd-15-1375-2022-supplement.zip › supplementary_material/figs-refjra55/taylor/LWT_18_wrt_jra55_nh_1979-2005.pdf]

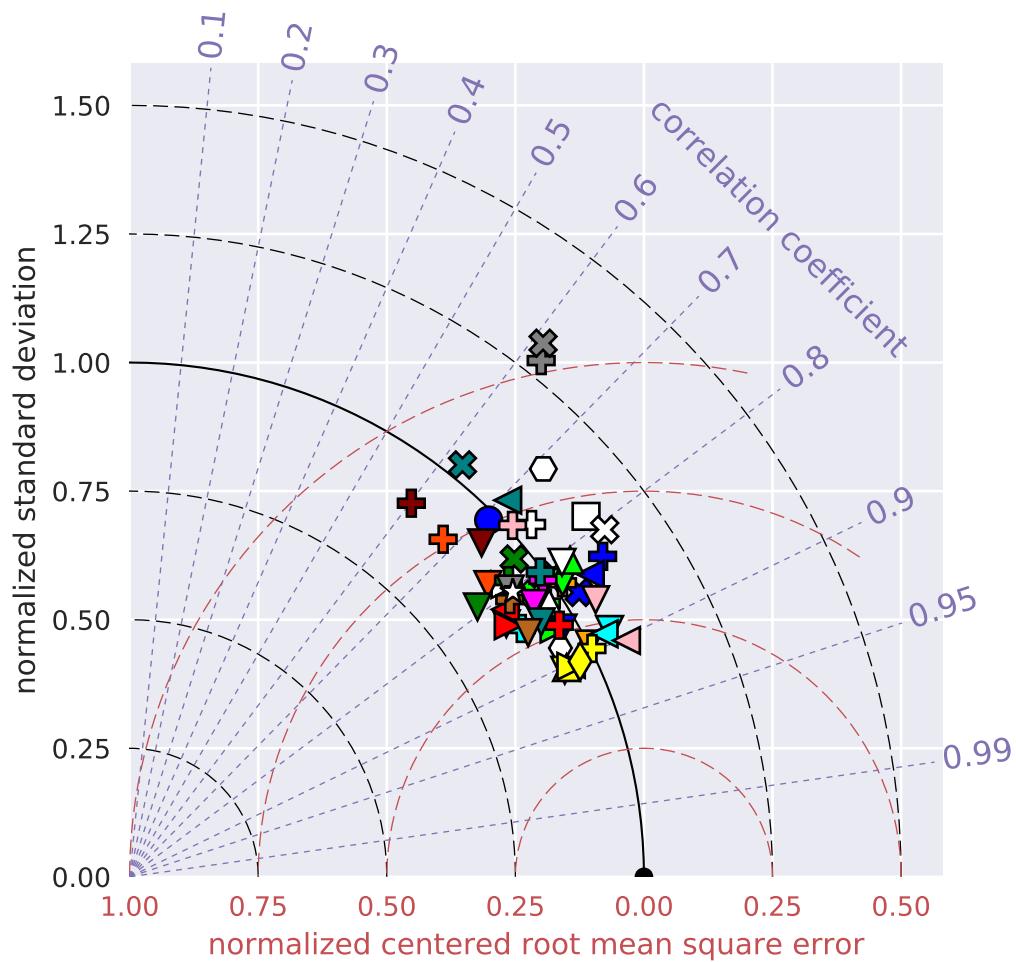

Supplement: Supplementary file 18 [file gmd-15-1375-2022-supplement.zip › supplementary_material/figs-refjra55/taylor/LWT_1_wrt_jra55_nh_1979-2005.pdf]

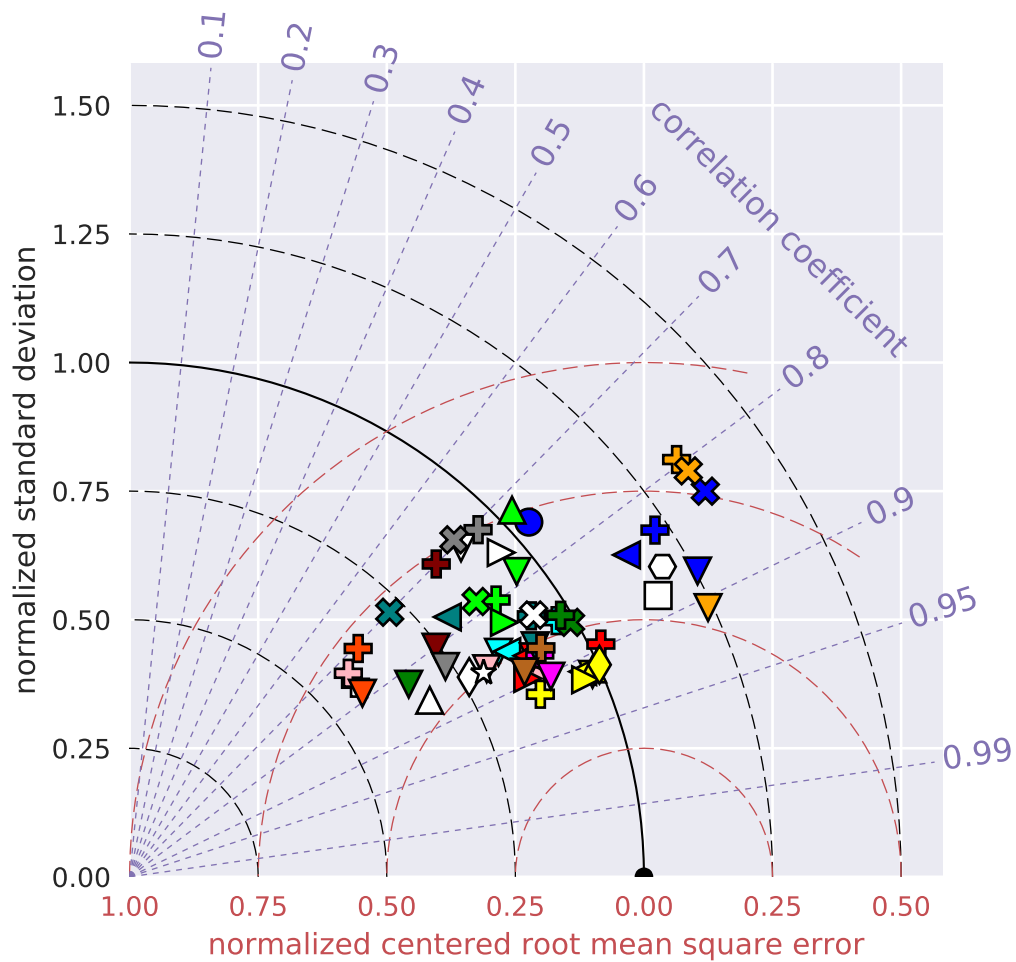

Supplement: Supplementary file 18 [file gmd-15-1375-2022-supplement.zip › supplementary_material/figs-refjra55/taylor/LWT_20_wrt_jra55_nh_1979-2005.pdf]

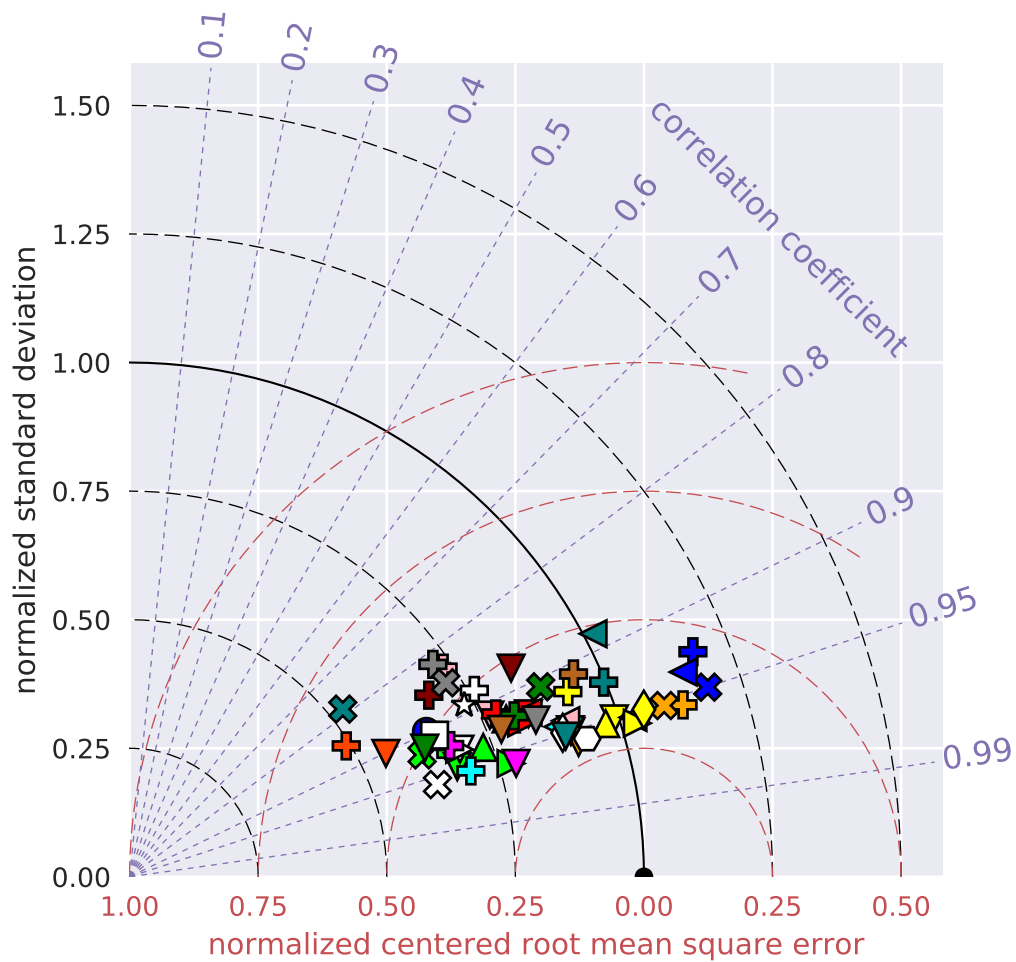

Supplement: Supplementary file 18 [file gmd-15-1375-2022-supplement.zip › supplementary_material/figs-refjra55/taylor/LWT_27_wrt_jra55_nh_1979-2005.pdf]

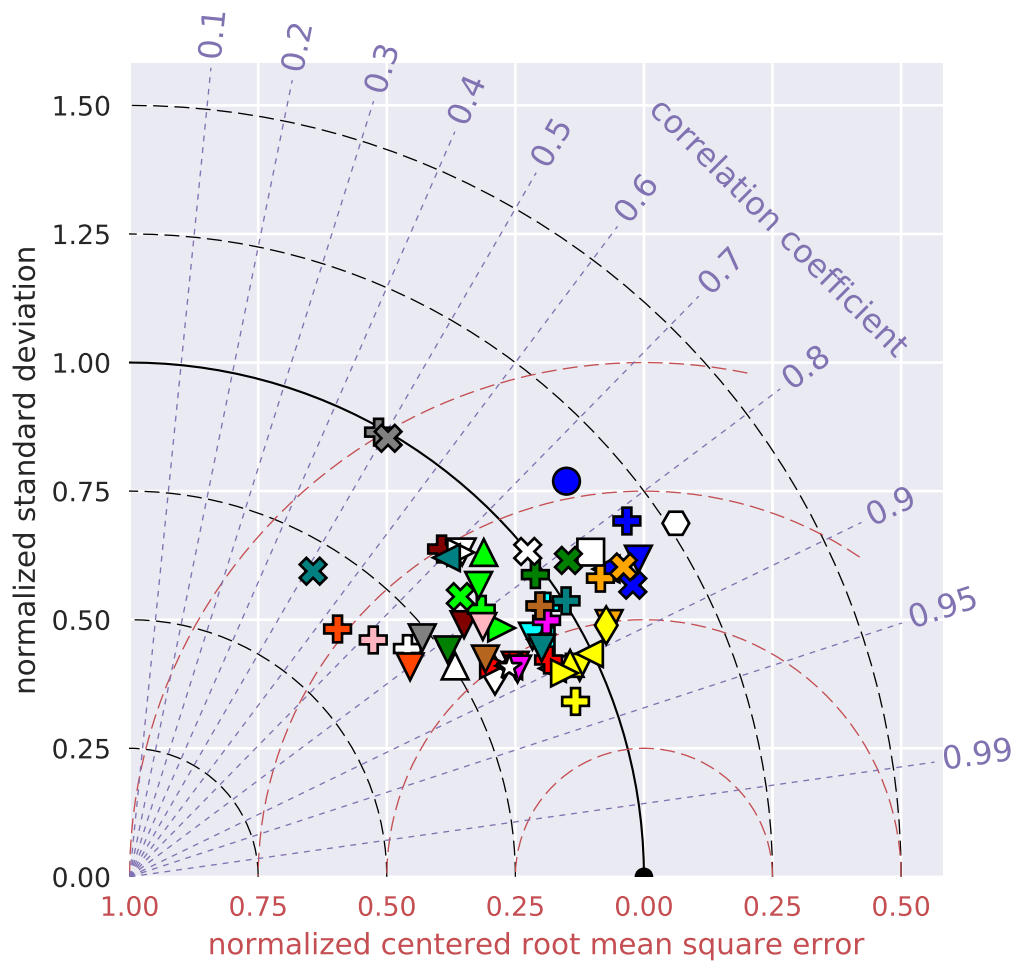

Supplement: Supplementary file 18 [file gmd-15-1375-2022-supplement.zip › supplementary_material/figs-refjra55/taylor/LWT_12_wrt_jra55_nh_1979-2005.pdf]

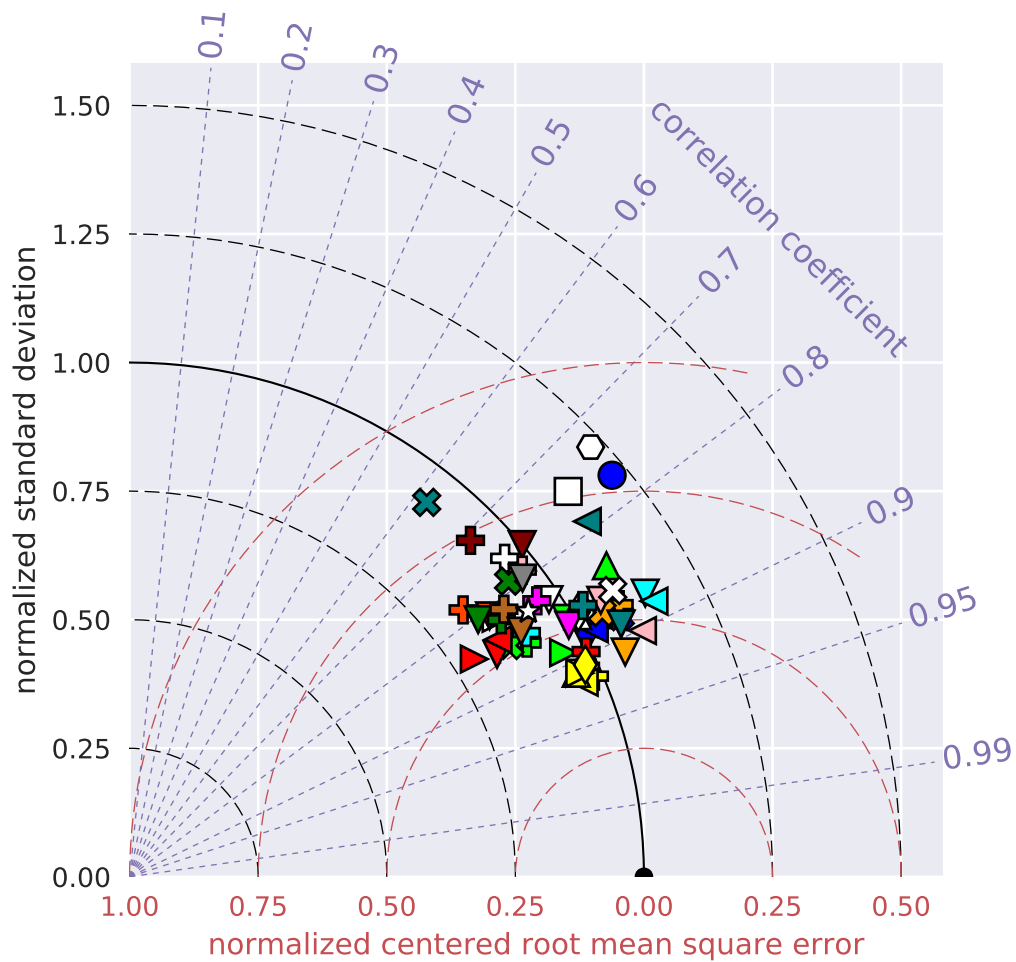

Supplement: Supplementary file 18 [file gmd-15-1375-2022-supplement.zip › supplementary_material/figs-refjra55/taylor/LWT_9_wrt_jra55_nh_1979-2005.pdf]

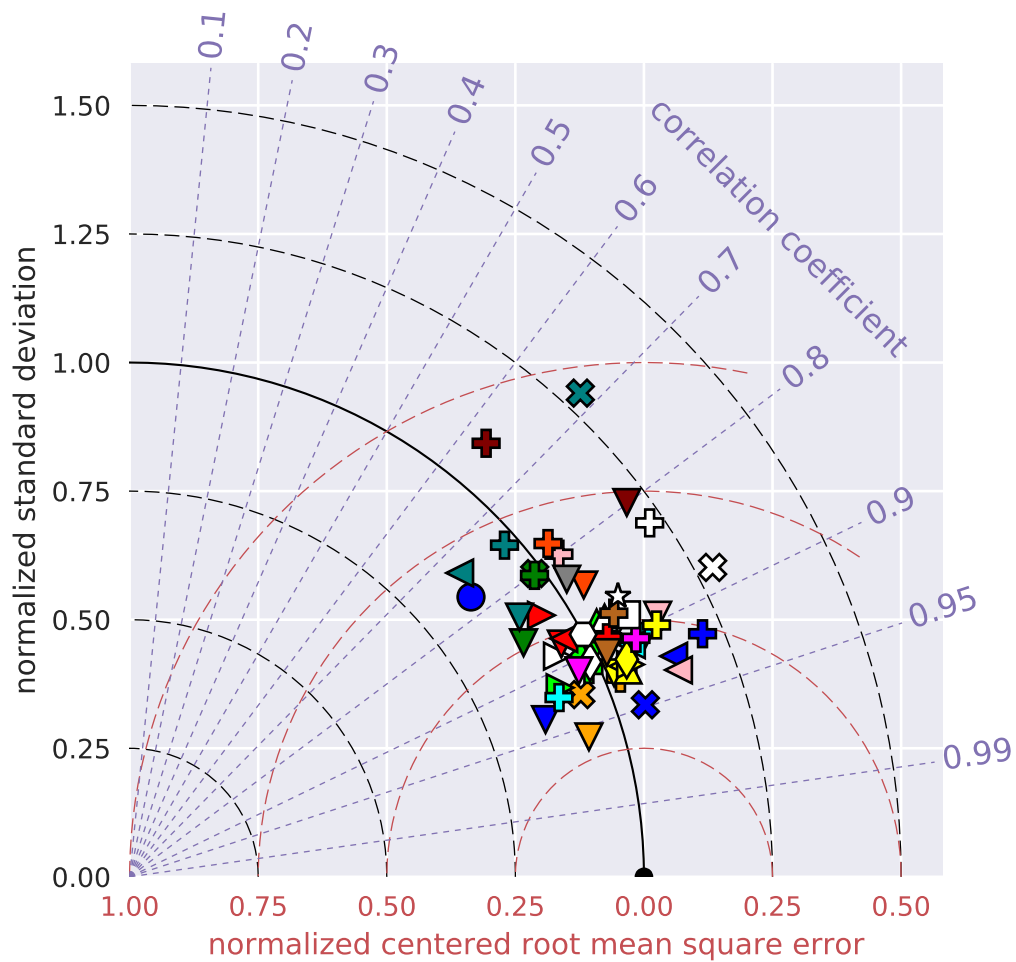

Supplement: Supplementary file 18 [file gmd-15-1375-2022-supplement.zip › supplementary_material/figs-refjra55/taylor/LWT_7_wrt_jra55_nh_1979-2005.pdf]

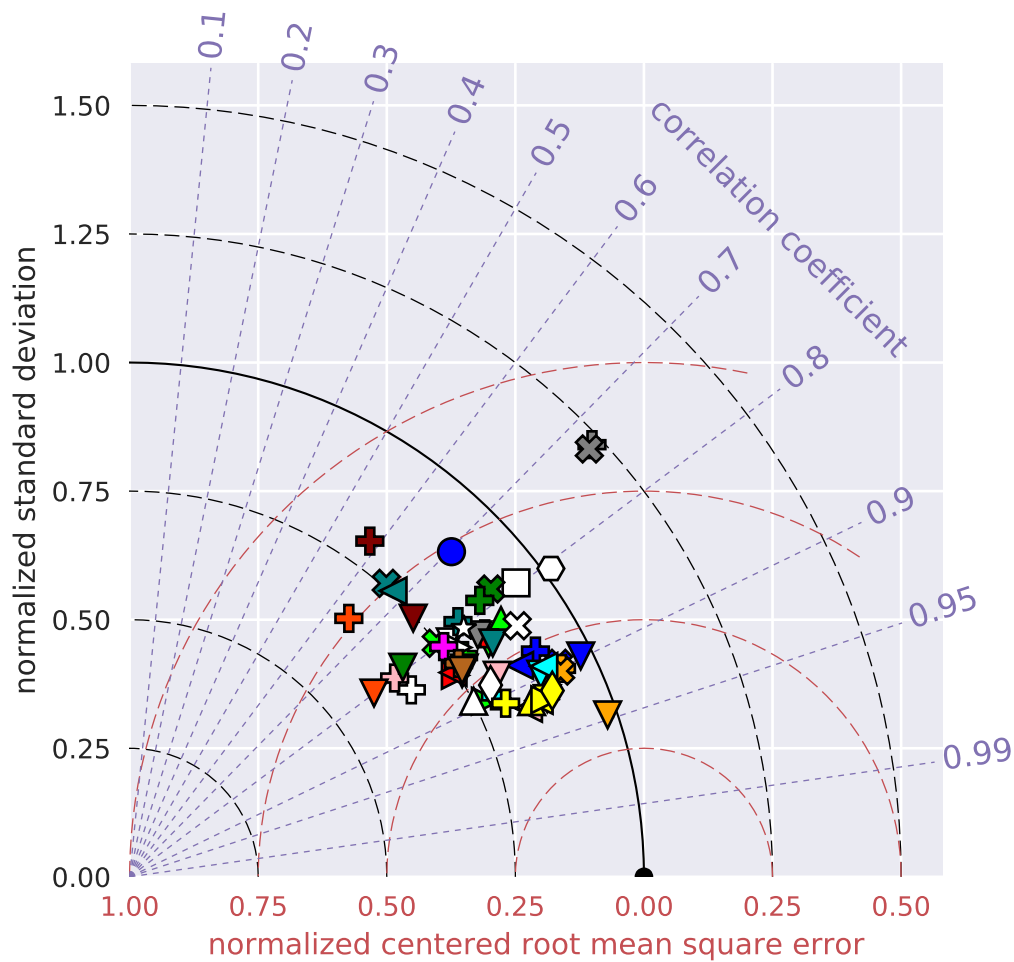

Supplement: Supplementary file 18 [file gmd-15-1375-2022-supplement.zip › supplementary_material/figs-refjra55/taylor/LWT_19_wrt_jra55_nh_1979-2005.pdf]

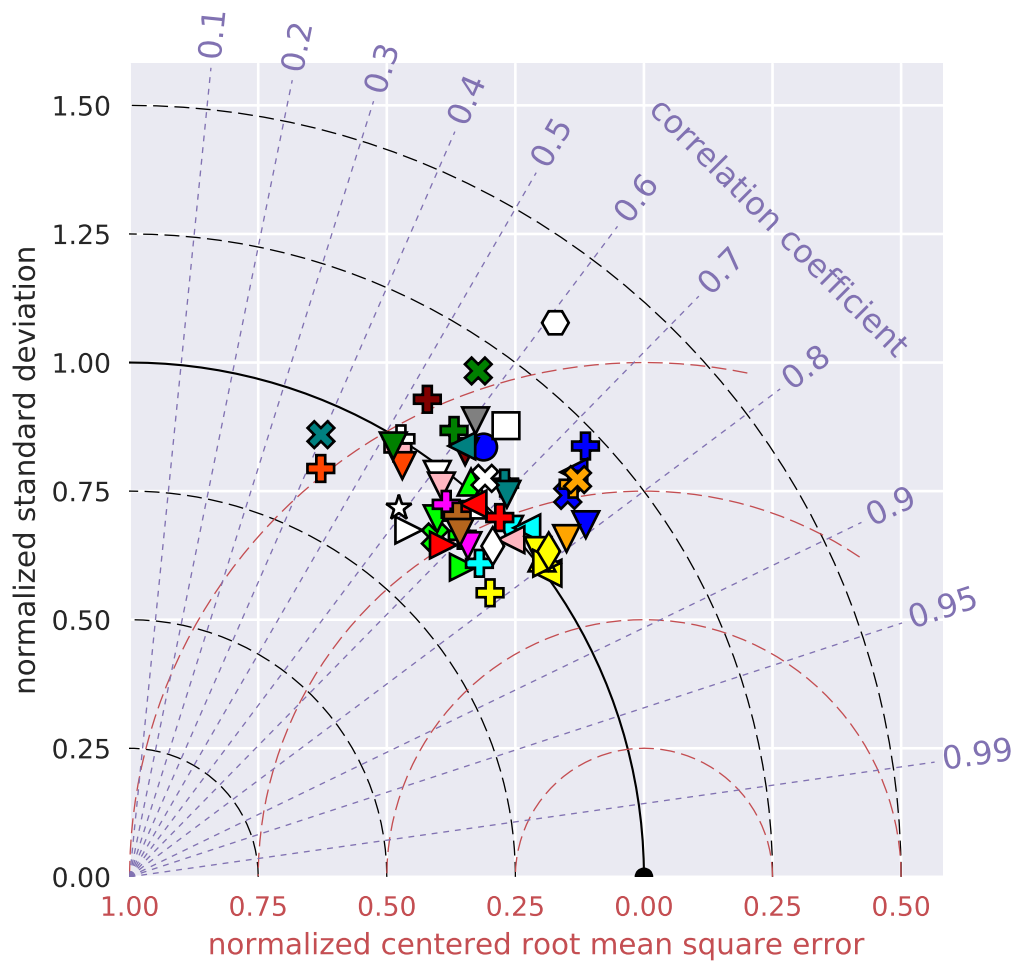

Supplement: Supplementary file 18 [file gmd-15-1375-2022-supplement.zip › supplementary_material/figs-refjra55/taylor/LWT_5_wrt_jra55_nh_1979-2005.pdf]

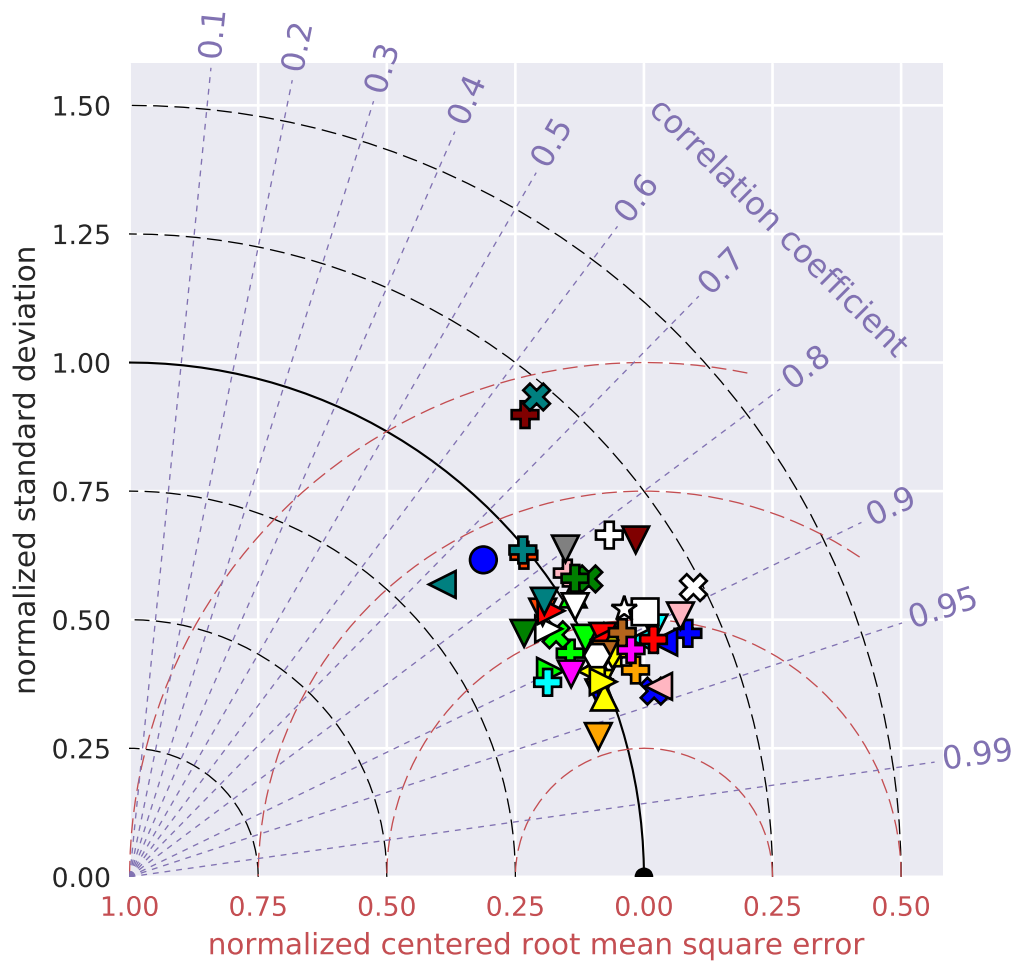

Supplement: Supplementary file 18 [file gmd-15-1375-2022-supplement.zip › supplementary_material/figs-refjra55/taylor/LWT_24_wrt_jra55_nh_1979-2005.pdf]

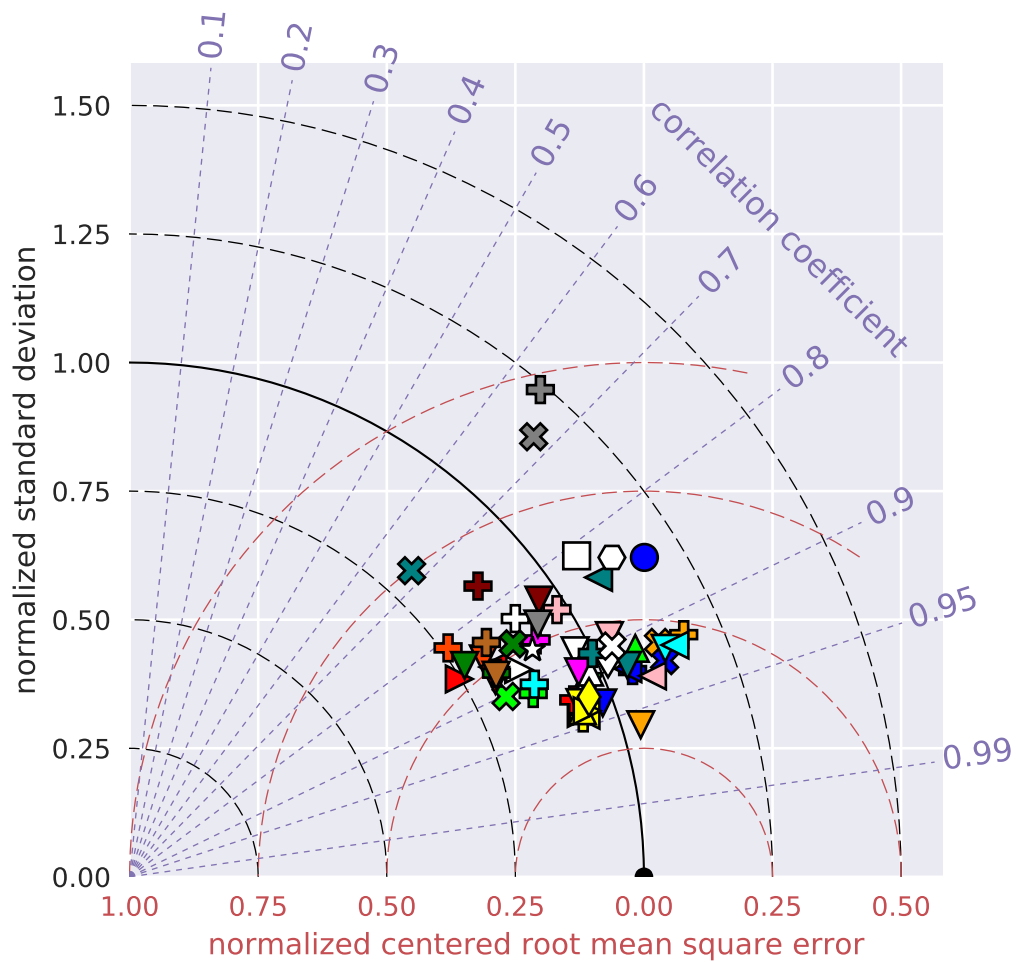

Supplement: Supplementary file 18 [file gmd-15-1375-2022-supplement.zip › supplementary_material/figs-refjra55/taylor/LWT_17_wrt_jra55_nh_1979-2005.pdf]

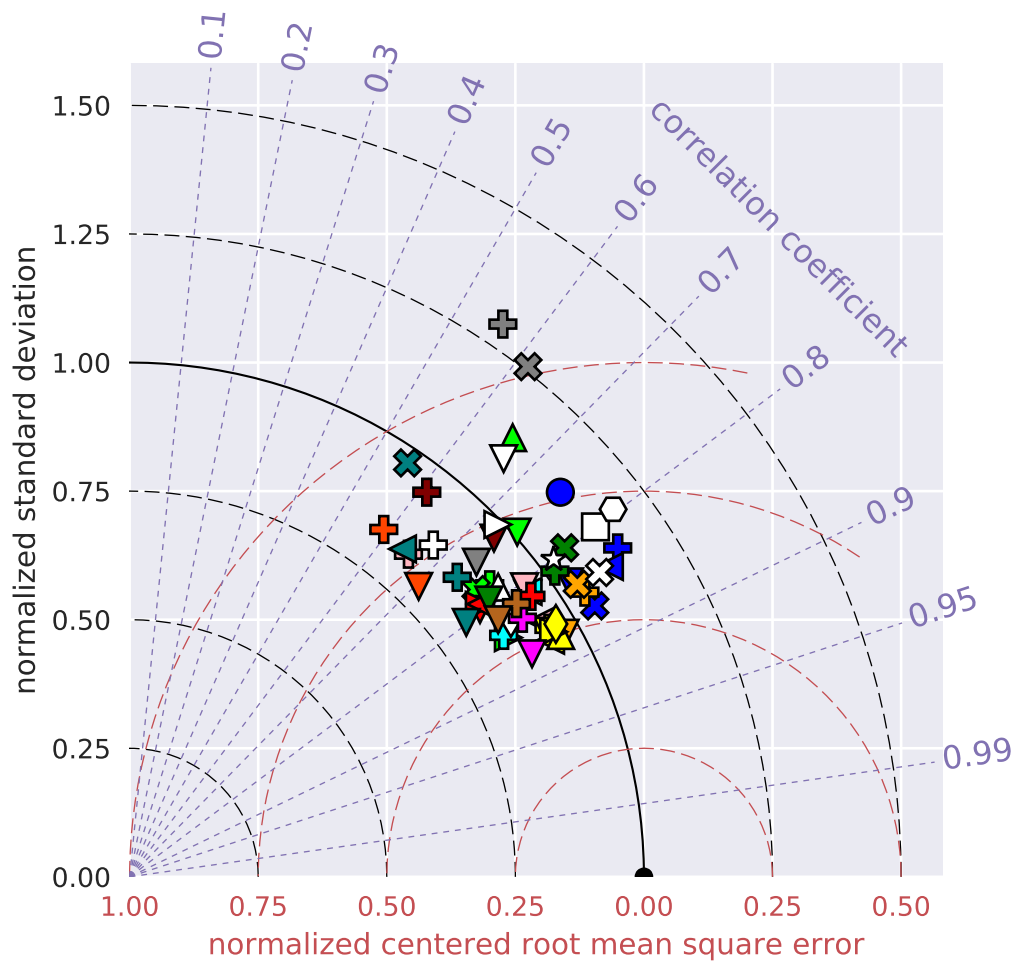

Supplement: Supplementary file 18 [file gmd-15-1375-2022-supplement.zip › supplementary_material/figs-refjra55/taylor/LWT_22_wrt_jra55_nh_1979-2005.pdf]

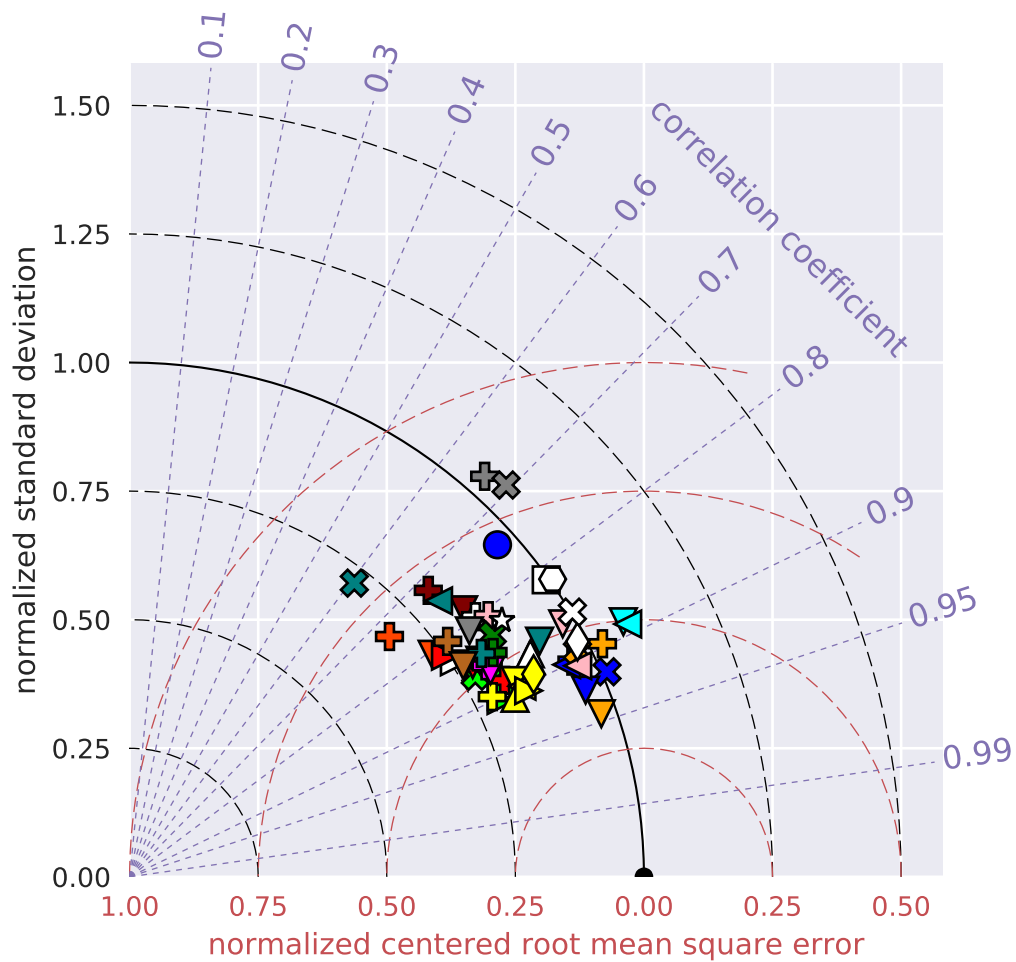

Supplement: Supplementary file 18 [file gmd-15-1375-2022-supplement.zip › supplementary_material/figs-refjra55/taylor/LWT_26_wrt_jra55_nh_1979-2005.pdf]

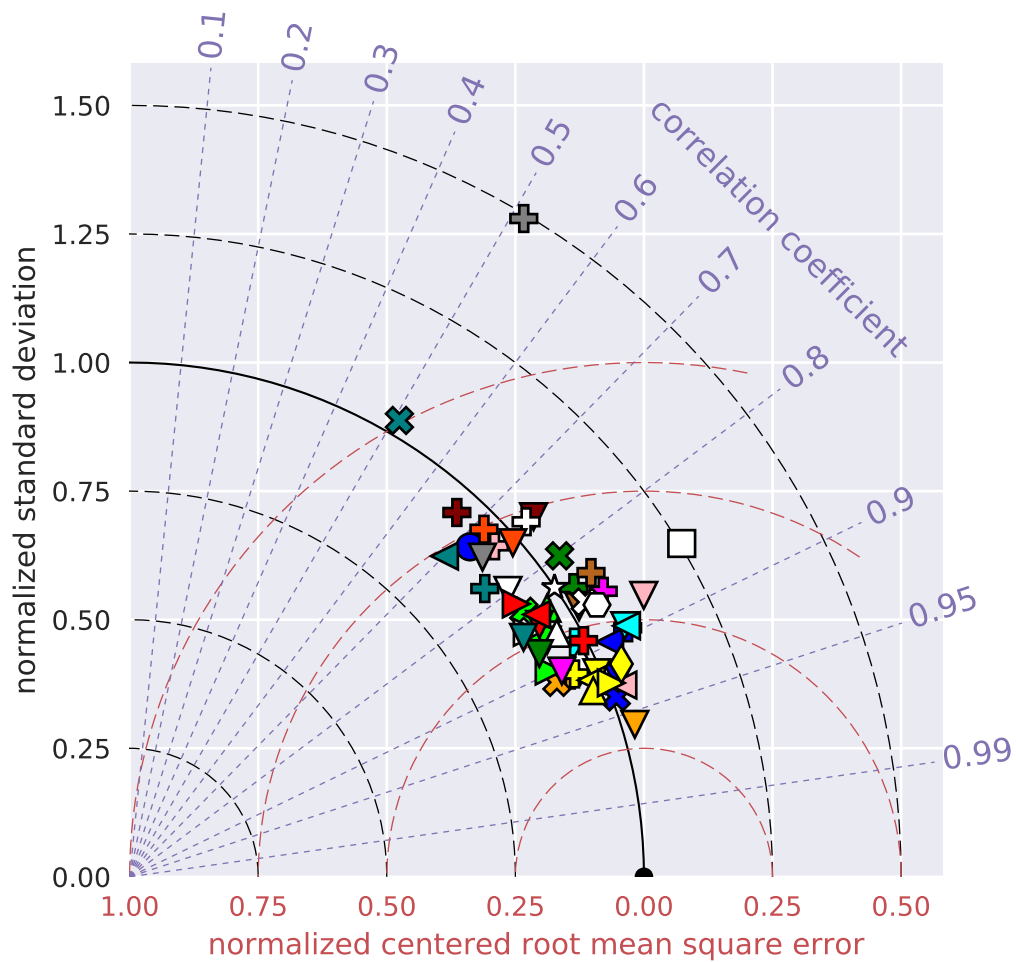

Supplement: Supplementary file 18 [file gmd-15-1375-2022-supplement.zip › supplementary_material/figs-refjra55/taylor/LWT_16_wrt_jra55_nh_1979-2005.pdf]

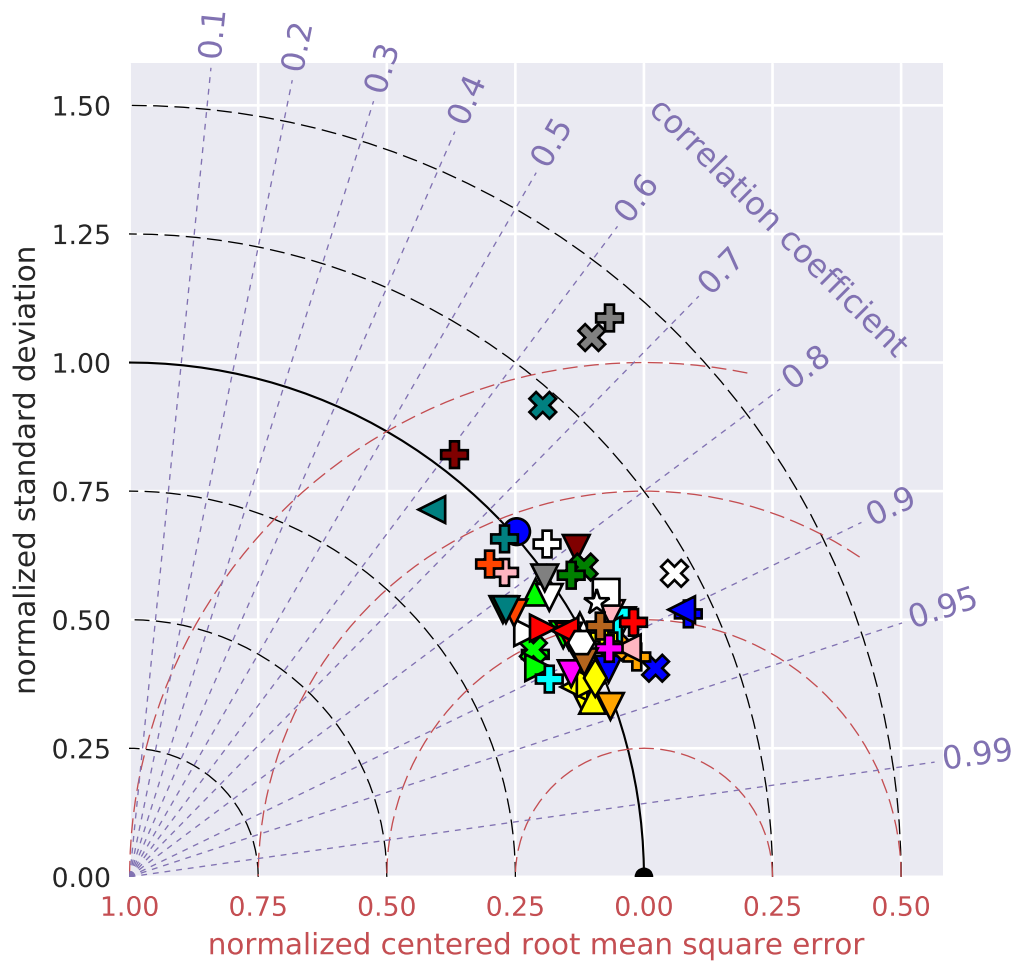

Supplement: Supplementary file 18 [file gmd-15-1375-2022-supplement.zip › supplementary_material/figs-refjra55/taylor/LWT_23_wrt_jra55_nh_1979-2005.pdf]

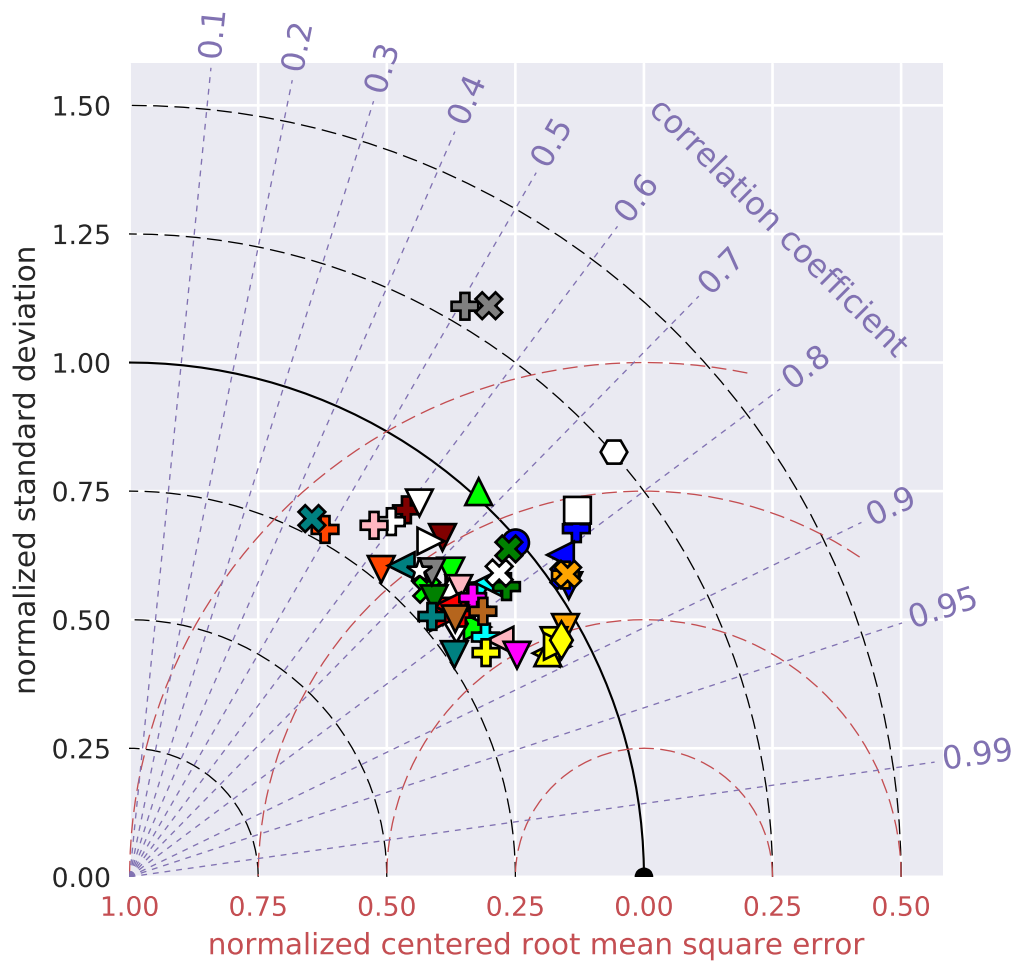

Supplement: Supplementary file 18 [file gmd-15-1375-2022-supplement.zip › supplementary_material/figs-refjra55/taylor/LWT_13_wrt_jra55_nh_1979-2005.pdf]

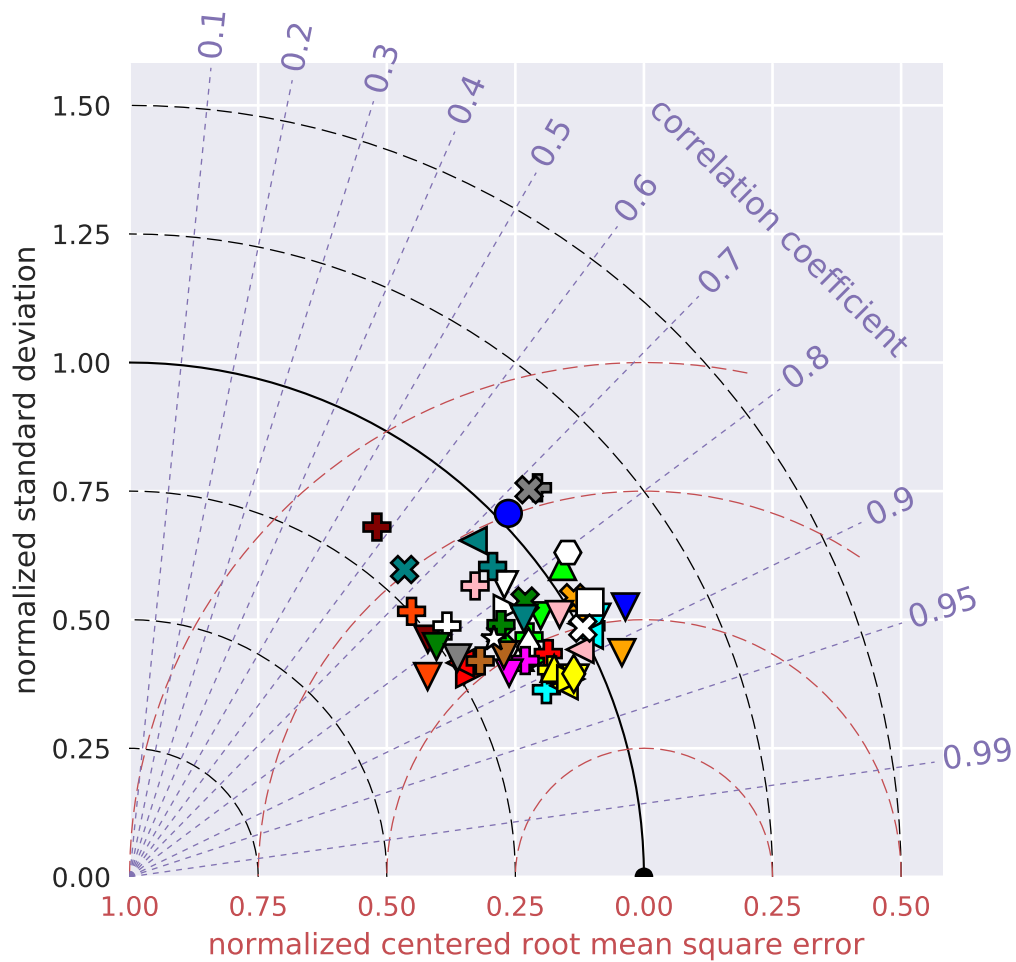

Supplement: Supplementary file 18 [file gmd-15-1375-2022-supplement.zip › supplementary_material/figs-refjra55/taylor/LWT_2_wrt_jra55_nh_1979-2005.pdf]

Performance rank for mpi\_esm\_lr, r1i1p1 w.r.t. jra55, 1979-2005, all seasons

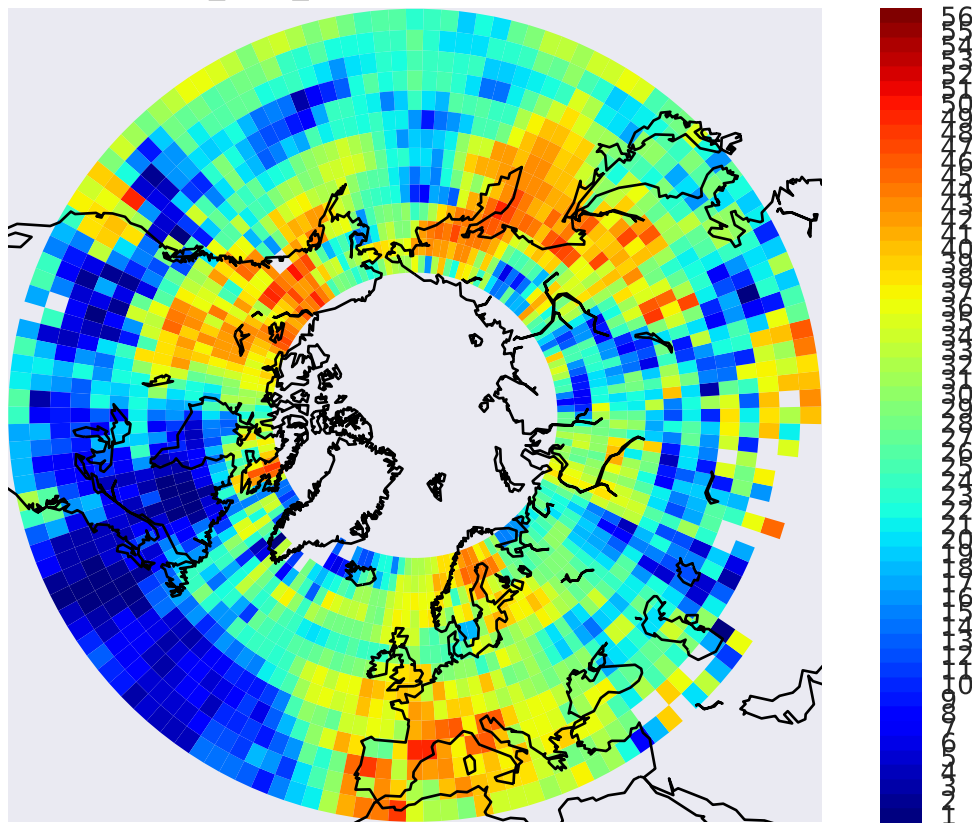

Supplement: Supplementary file 18 [file gmd-15-1375-2022-supplement.zip › supplementary_material/figs-refjra55/maps/rank/rank_mpi_esm_lr_r1i1p1_wrt_jra55_nh_1979-2005.pdf]

Performance rank for cmcc\_esm2, r1i1p1f1 w.r.t. jra55, 1979-2005, all seasons

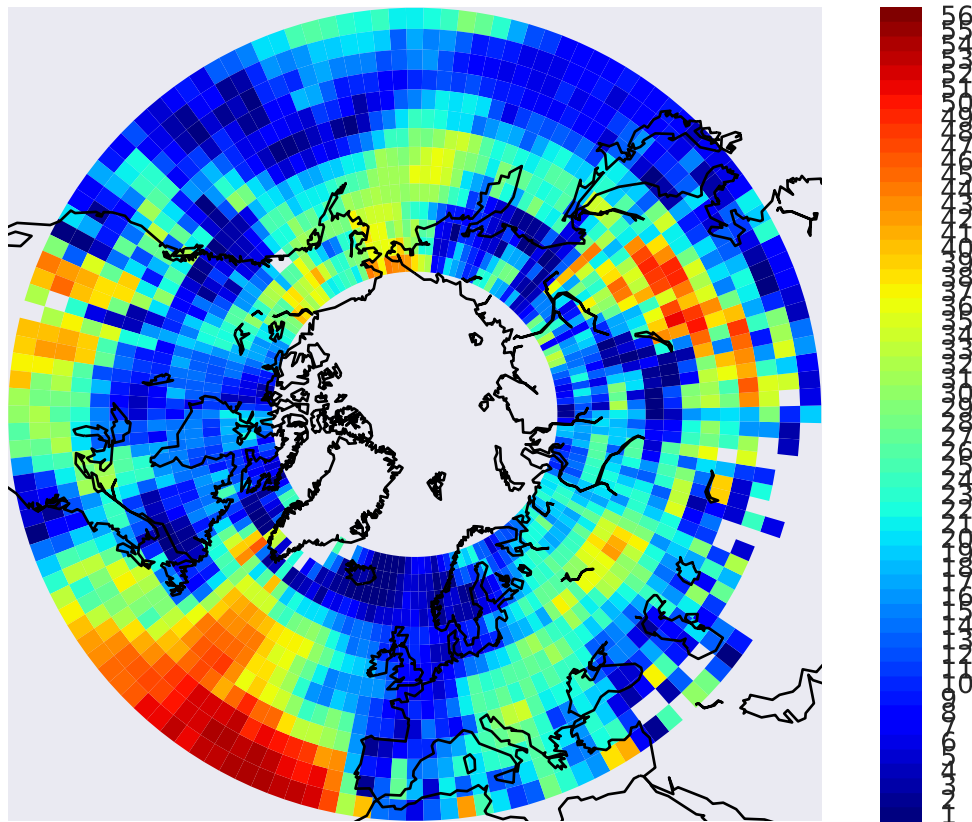

Supplement: Supplementary file 18 [file gmd-15-1375-2022-supplement.zip › supplementary_material/figs-refjra55/maps/rank/rank_cmcc_esm2_r1i1p1f1_wrt_jra55_nh_1979-2005.pdf]

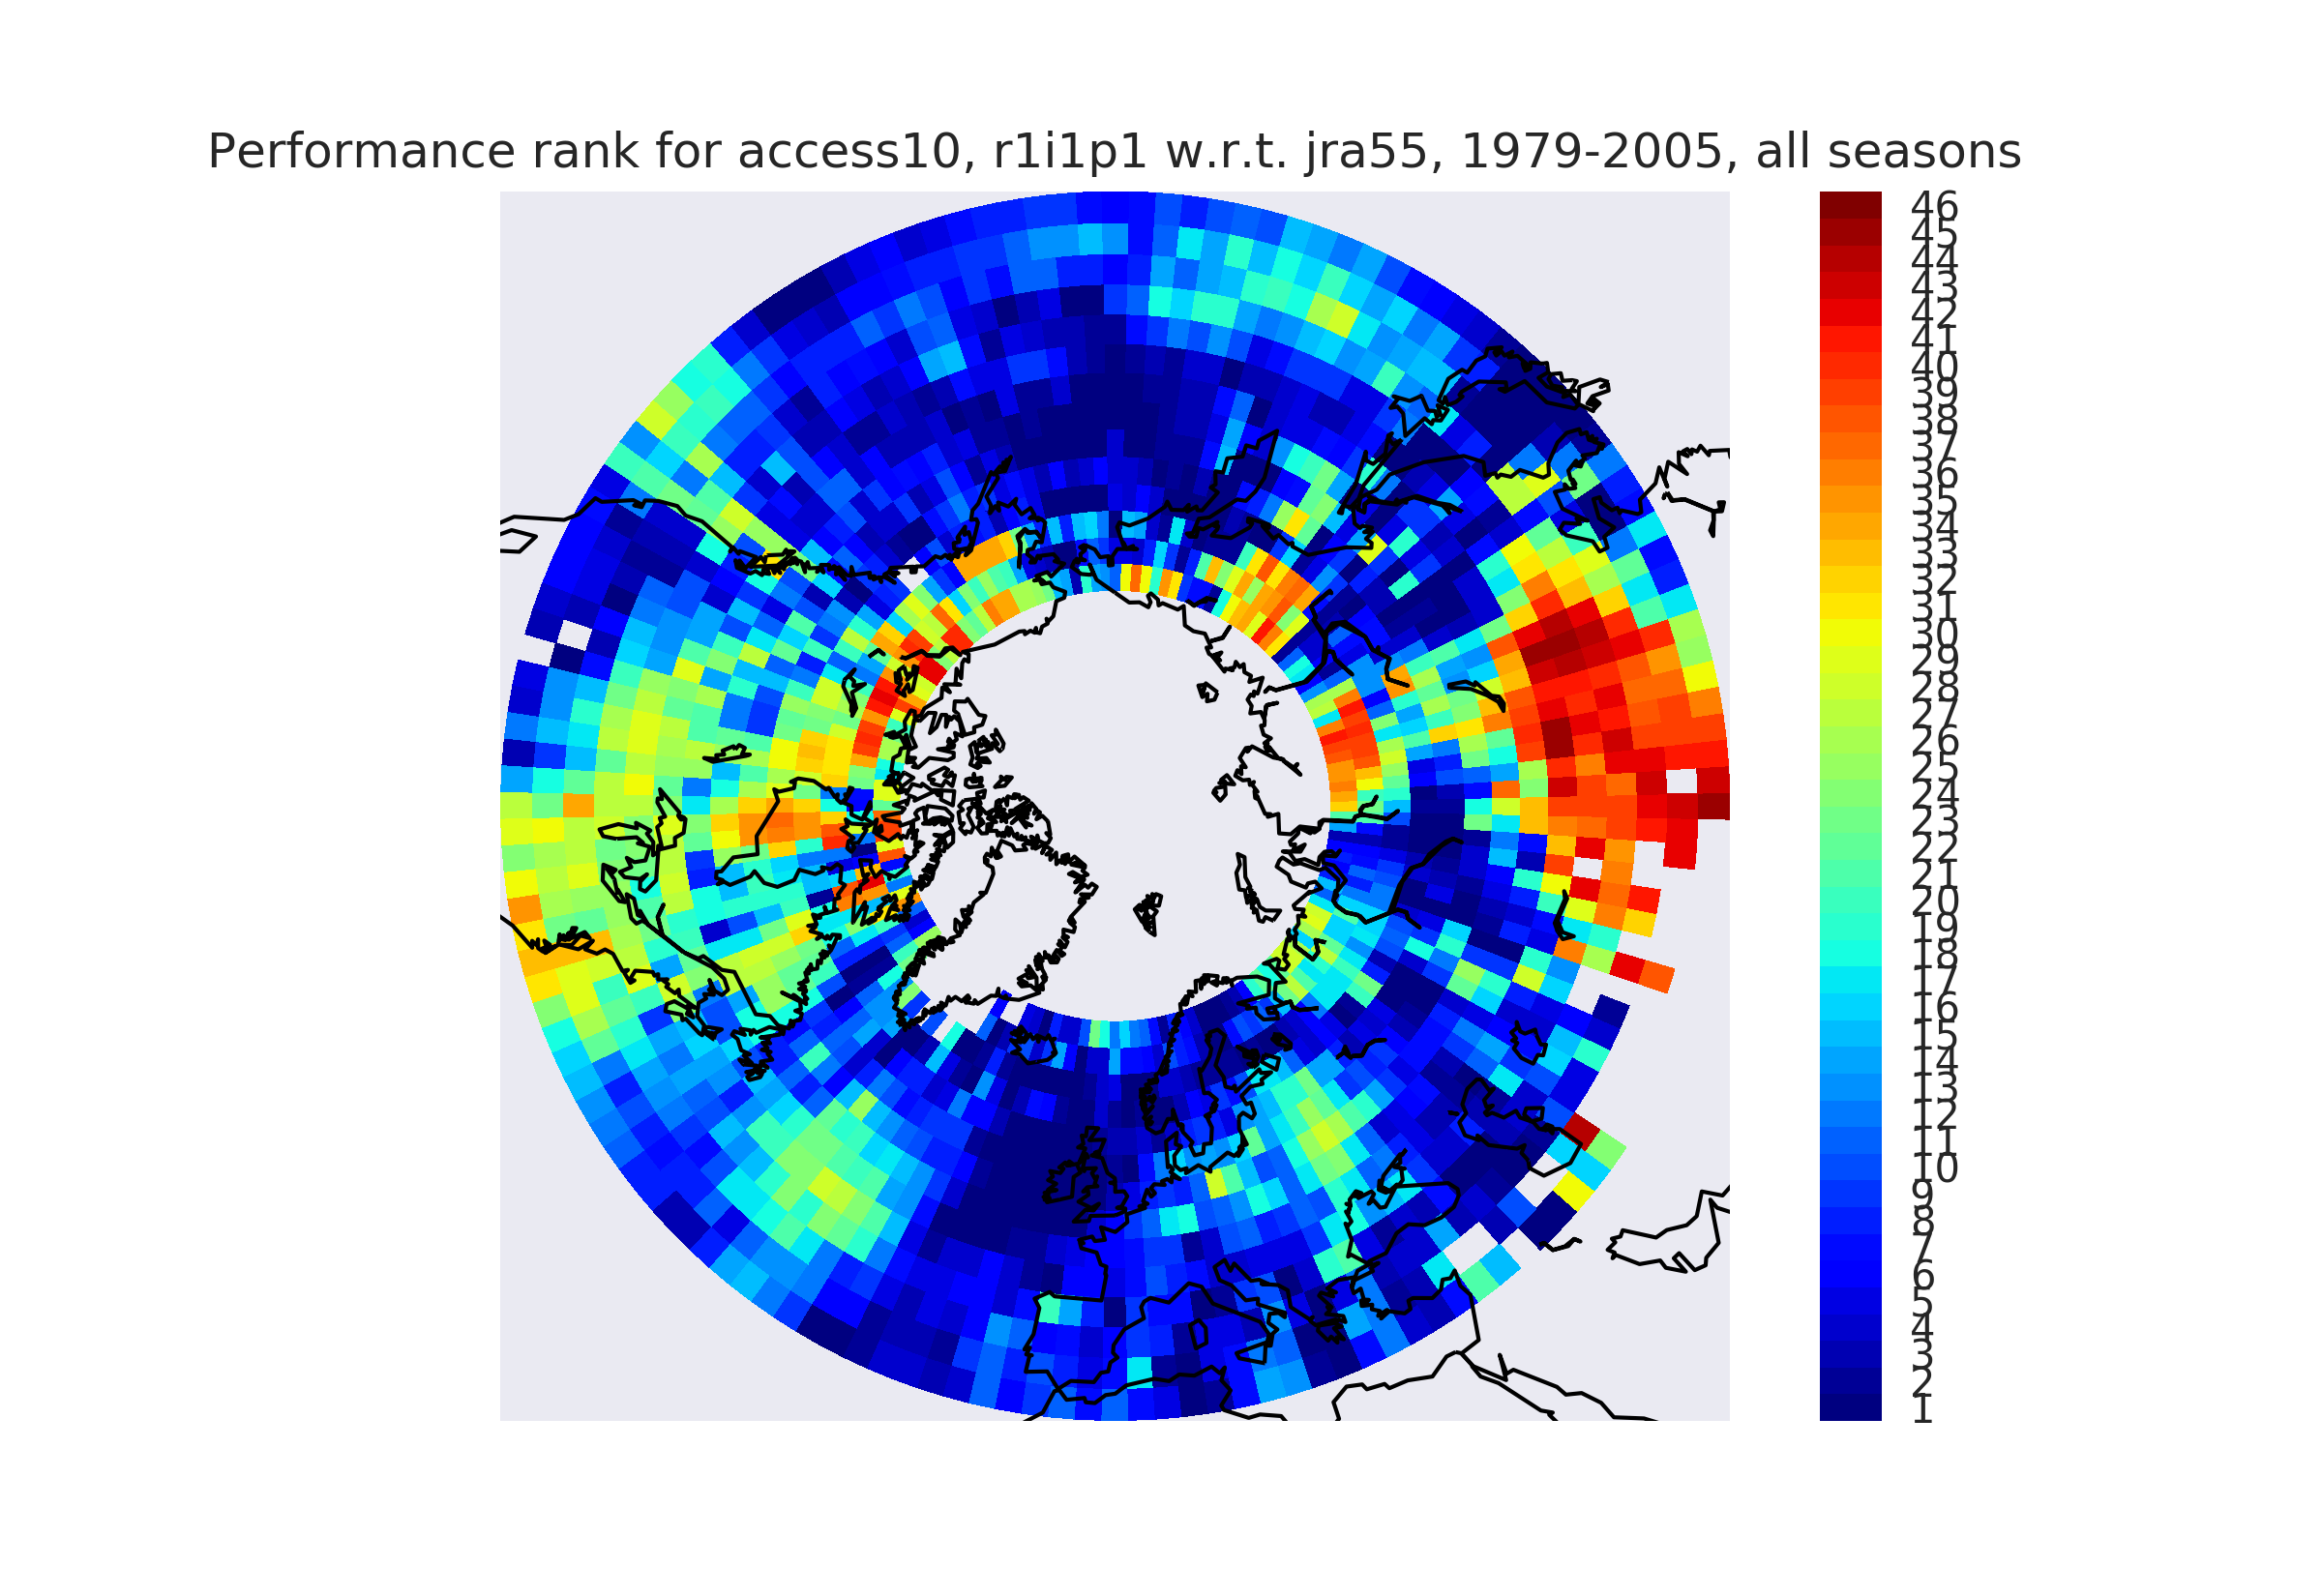

Supplement: Supplementary file 18 [file gmd-15-1375-2022-supplement.zip › supplementary_material/figs-refjra55/maps/rank/rank_access10_r1i1p1_wrt_jra55_1979-2005.png]

Performance rank for ec\_earth3\_cc, r1i1p1f1 w.r.t. jra55, 1979-2005, all seasons

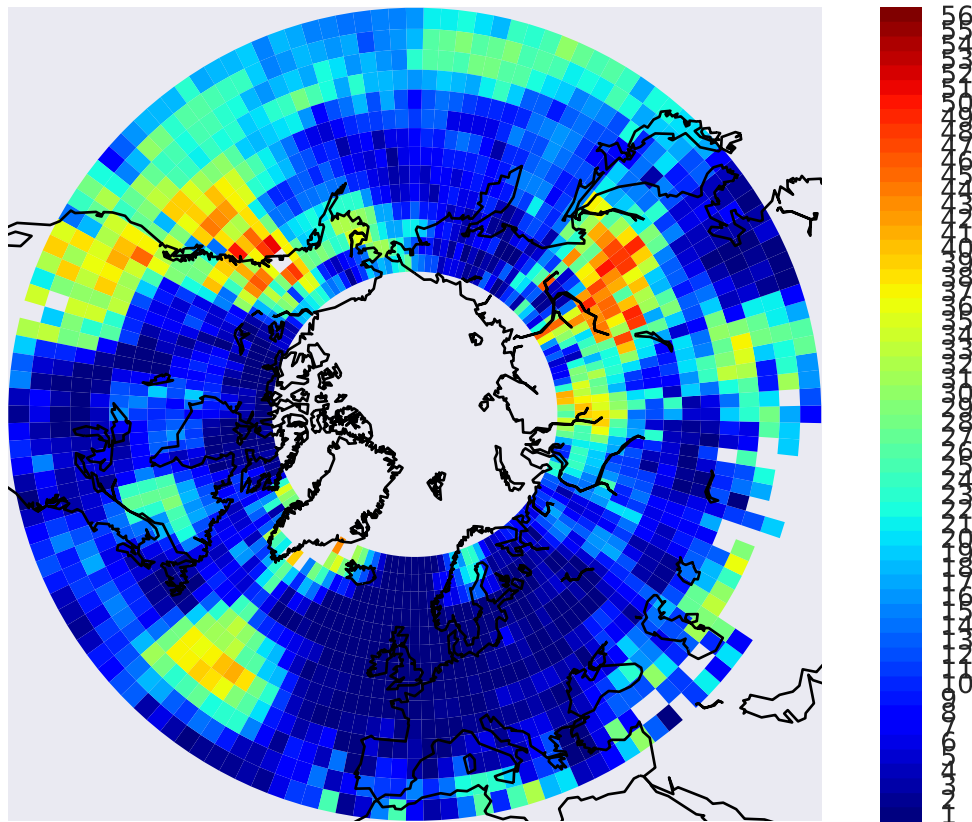

Supplement: Supplementary file 18 [file gmd-15-1375-2022-supplement.zip › supplementary_material/figs-refjra55/maps/rank/rank_ec_earth3_cc_r1i1p1f1_wrt_jra55_nh_1979-2005.pdf]

Performance rank for ccsm4, r6i1p1 w.r.t. jra55, 1979-2005, all seasons

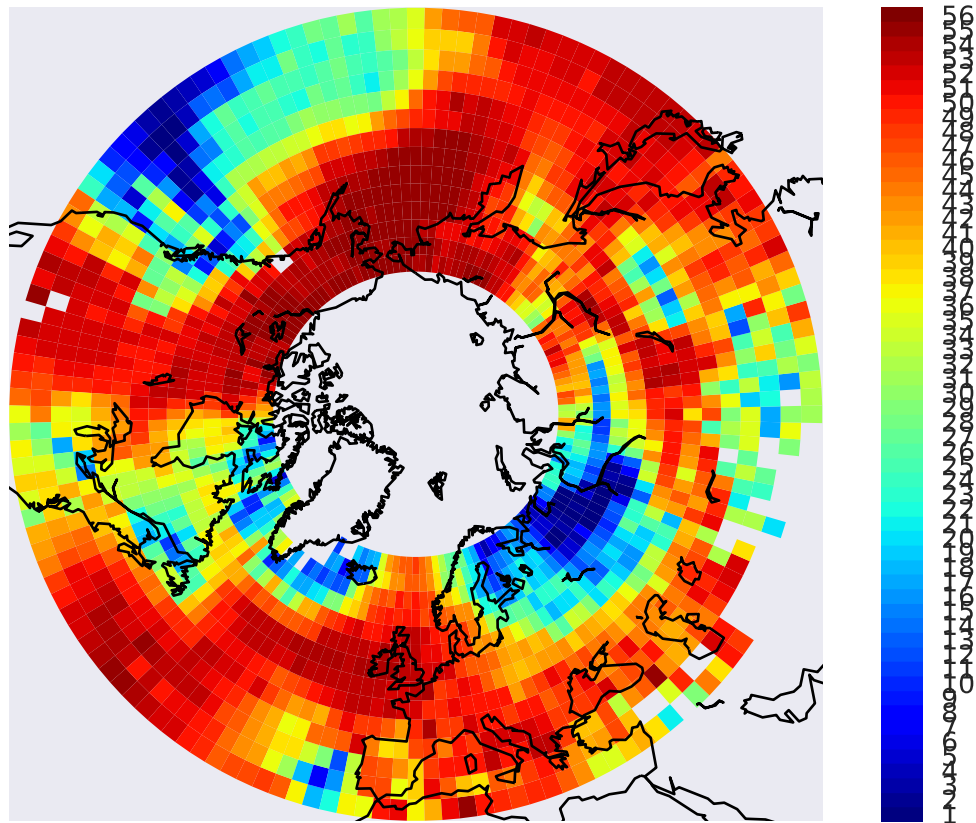

Supplement: Supplementary file 18 [file gmd-15-1375-2022-supplement.zip › supplementary_material/figs-refjra55/maps/rank/rank_ccsm4_r6i1p1_wrt_jra55_nh_1979-2005.pdf]

Performance rank for cnrm\_cm5, rli1p1 w.r.t. jra55, 1979-2005, all seasons

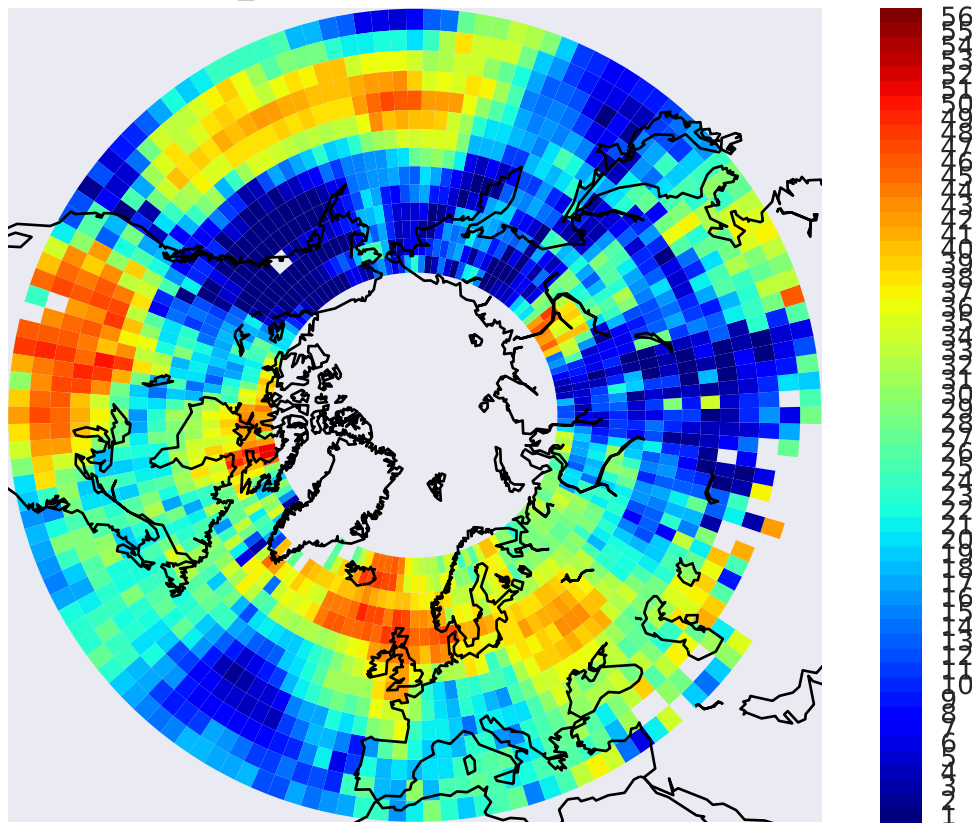

Supplement: Supplementary file 18 [file gmd-15-1375-2022-supplement.zip › supplementary_material/figs-refjra55/maps/rank/rank_cnrm_cm5_r1i1p1_wrt_jra55_nh_1979-2005.pdf]

Performance rank for ipsl\_cm5a\_lr, r1i1p1 w.r.t. jra55, 1979-2005, all seasons

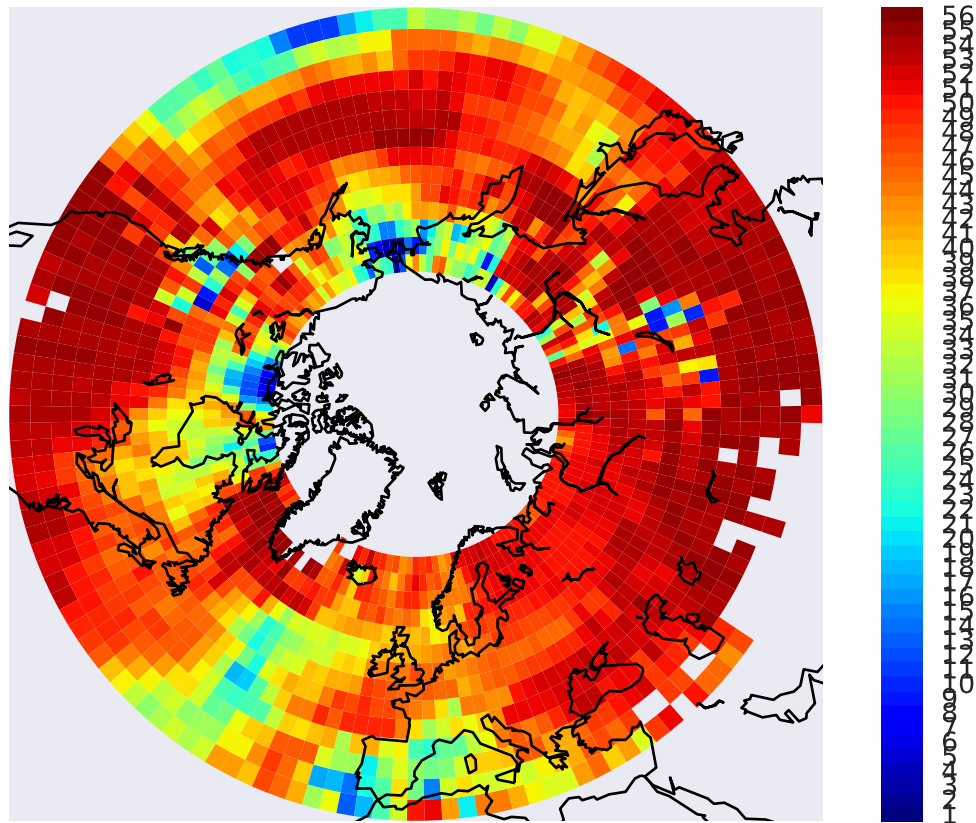

Supplement: Supplementary file 18 [file gmd-15-1375-2022-supplement.zip › supplementary_material/figs-refjra55/maps/rank/rank_ipsl_cm5a_lr_r1i1p1_wrt_jra55_nh_1979-2005.pdf]

Performance rank for bcc\_csm2\_mr, r1i1p1f1 w.r.t. jra55, 1979-2005, all seasons

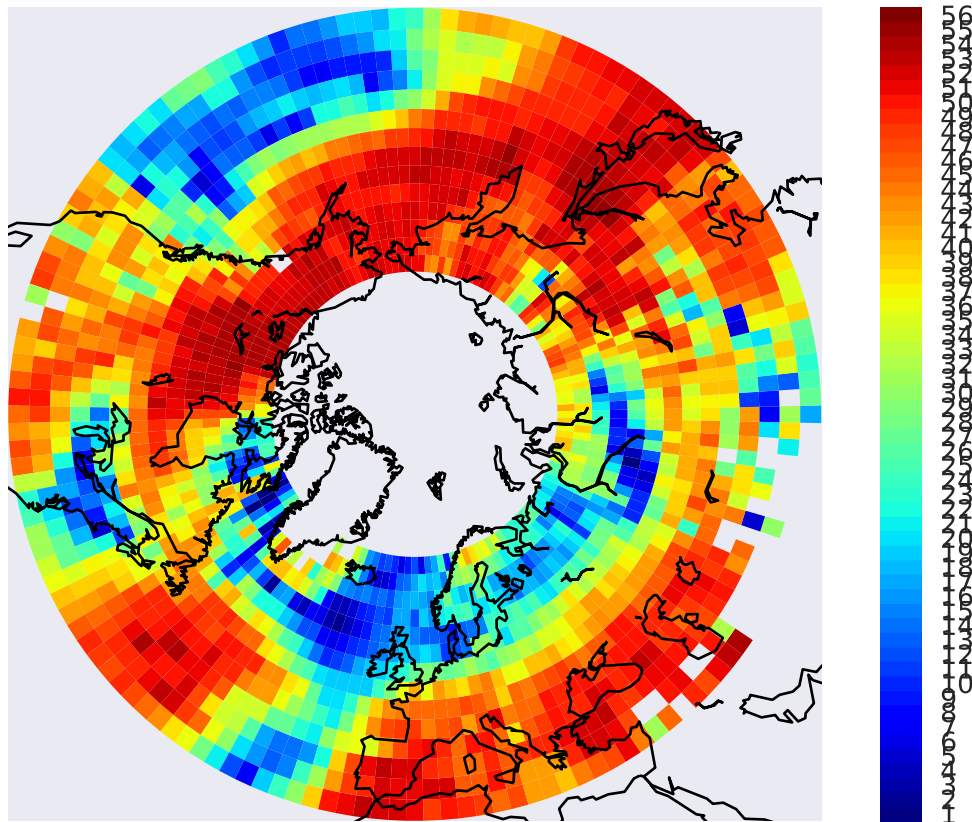

Supplement: Supplementary file 18 [file gmd-15-1375-2022-supplement.zip › supplementary_material/figs-refjra55/maps/rank/rank_bcc_csm2_mr_r1i1p1f1_wrt_jra55_nh_1979-2005.pdf]

Performance rank for mpi\_esm\_mr, rli1p1 w.r.t. jra55, 1979-2005, all seasons

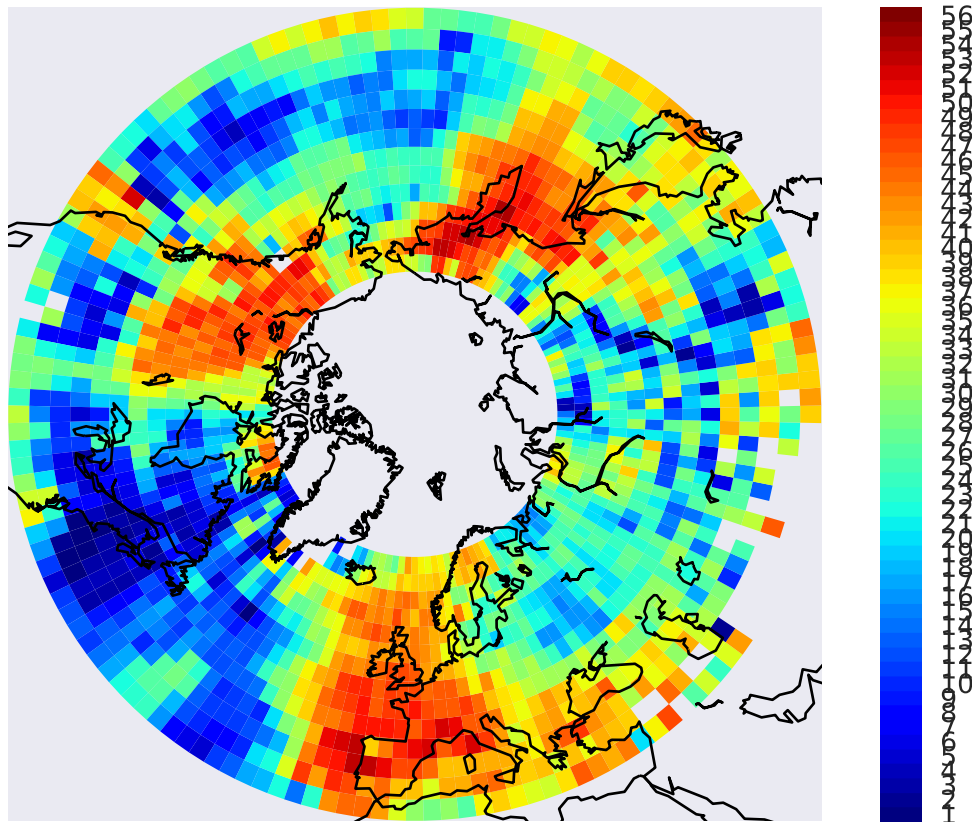

Supplement: Supplementary file 18 [file gmd-15-1375-2022-supplement.zip › supplementary_material/figs-refjra55/maps/rank/rank_mpi_esm_mr_r1i1p1_wrt_jra55_nh_1979-2005.pdf]

Performance rank for taiesm1, rli1p1f1 w.r.t. jra55, 1979-2005, all seasons

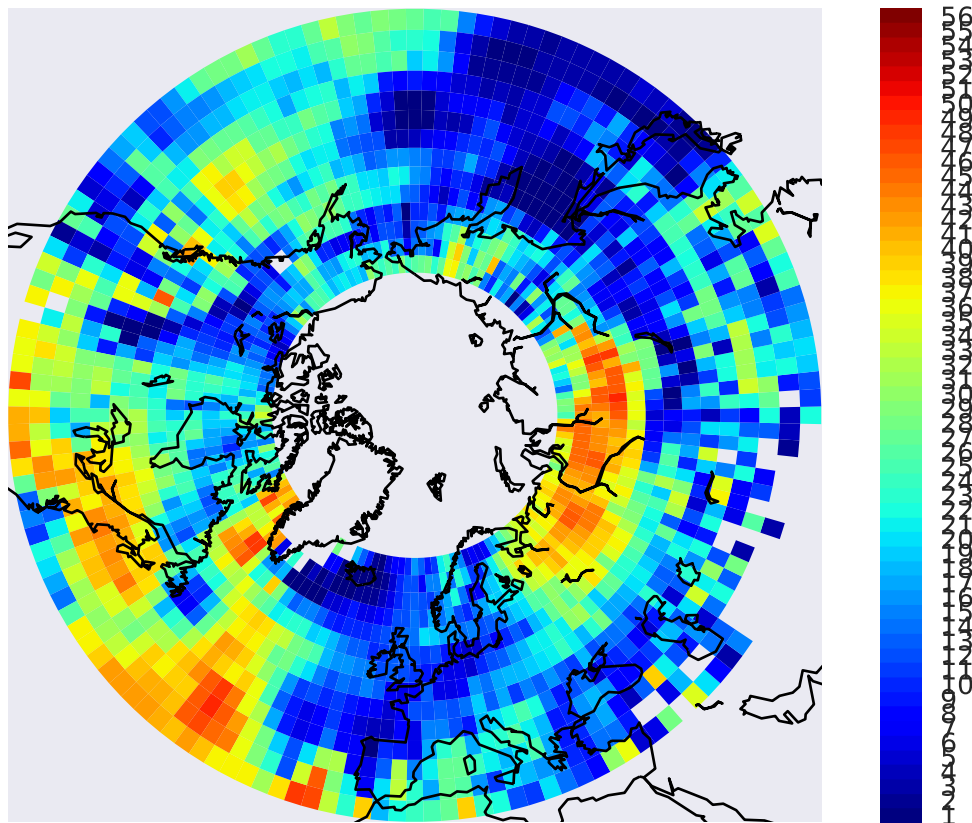

Supplement: Supplementary file 18 [file gmd-15-1375-2022-supplement.zip › supplementary_material/figs-refjra55/maps/rank/rank_taiesm1_r1i1p1f1_wrt_jra55_nh_1979-2005.pdf]

Performance rank for ec\_earth3, r1i1p1f1 w.r.t. jra55, 1979-2005, all seasons

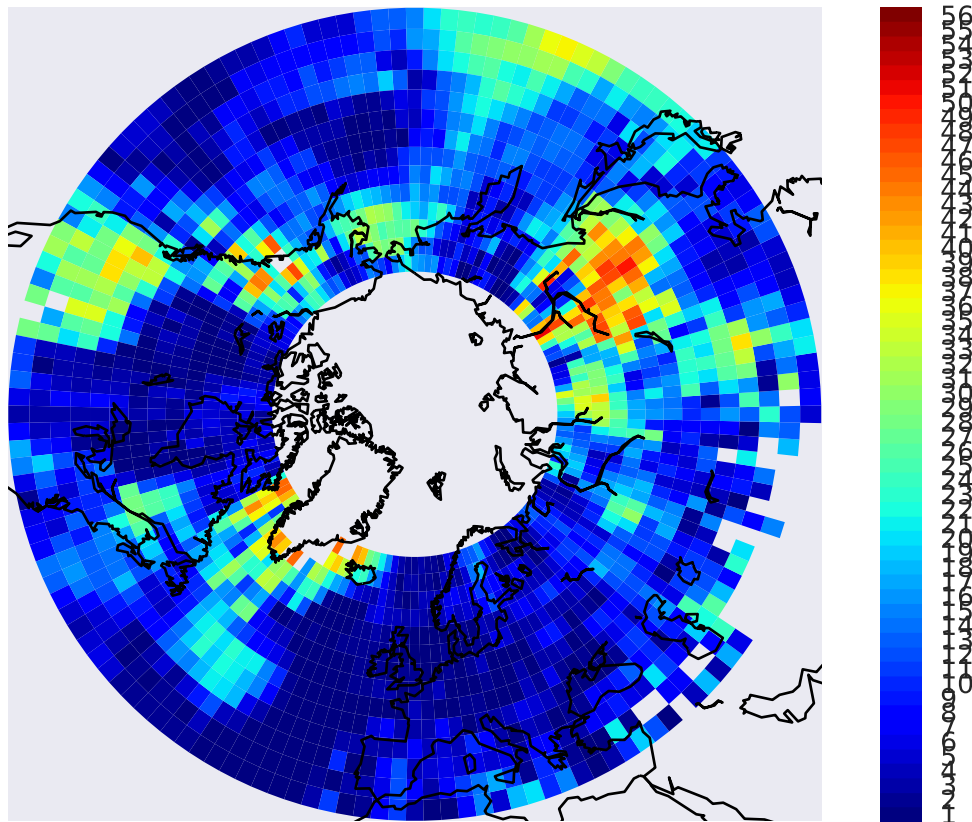

Supplement: Supplementary file 18 [file gmd-15-1375-2022-supplement.zip › supplementary_material/figs-refjra55/maps/rank/rank_ec_earth3_r1i1p1f1_wrt_jra55_nh_1979-2005.pdf]

Performance rank for awi\_esm\_1\_1\_lr, r1i1p1f1 w.r.t. jra55, 1979-2005, all seasons

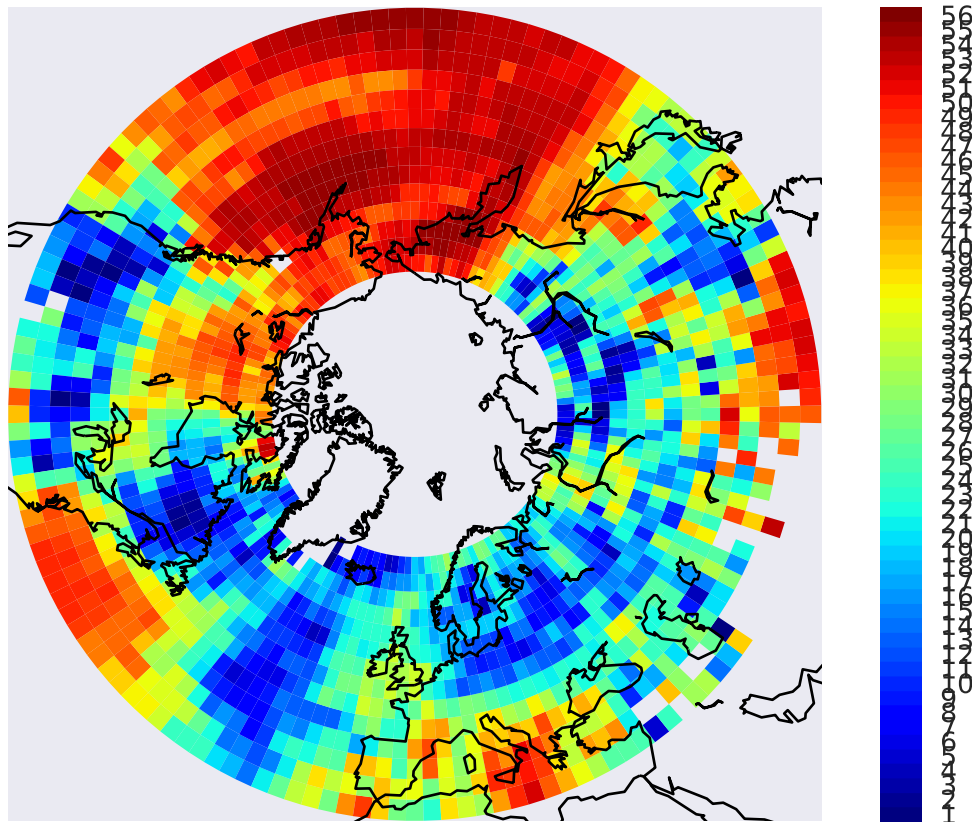

Supplement: Supplementary file 18 [file gmd-15-1375-2022-supplement.zip › supplementary_material/figs-refjra55/maps/rank/rank_awi_esm_1_1_lr_r1i1p1f1_wrt_jra55_nh_1979-2005.pdf]

Performance rank for cmcc\_cm, rli1p1 w.r.t. jra55, 1979-2005, all seasons

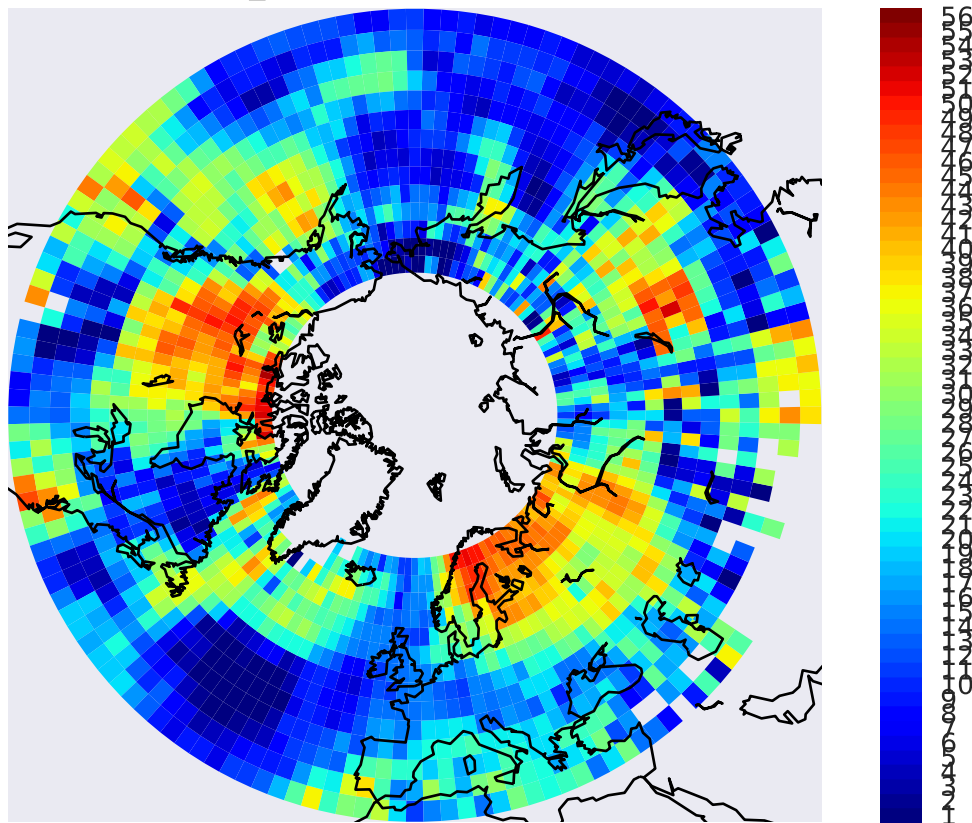

Supplement: Supplementary file 18 [file gmd-15-1375-2022-supplement.zip › supplementary_material/figs-refjra55/maps/rank/rank_cmcc_cm_r1i1p1_wrt_jra55_nh_1979-2005.pdf]

Performance rank for giss\_e2\_h, r6i1p1 w.r.t. jra55, 1979-2005, all seasons

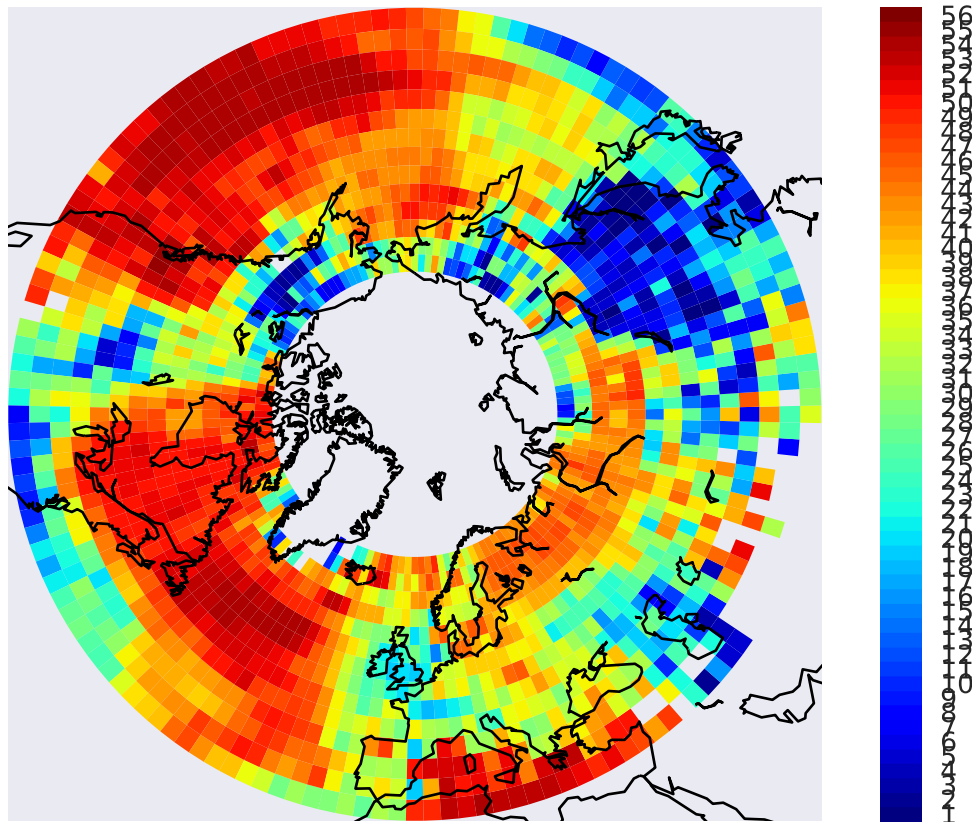

Supplement: Supplementary file 18 [file gmd-15-1375-2022-supplement.zip › supplementary_material/figs-refjra55/maps/rank/rank_giss_e2_h_r6i1p1_wrt_jra55_nh_1979-2005.pdf]

Performance rank for cnrm\_cm6\_1\_hr, r1i1p1f2 w.r.t. jra55, 1979-2005, all seasons

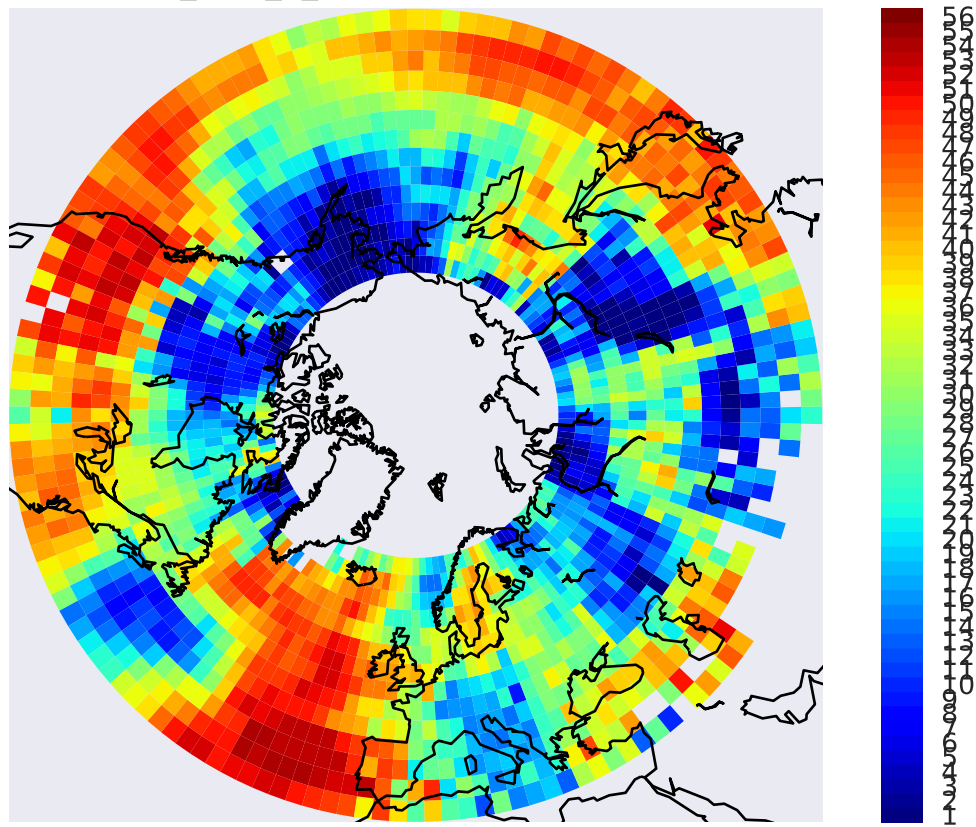

Supplement: Supplementary file 18 [file gmd-15-1375-2022-supplement.zip › supplementary_material/figs-refjra55/maps/rank/rank_cnrm_cm6_1_hr_r1i1p1f2_wrt_jra55_nh_1979-2005.pdf]

Performance rank for csiro\_mk3\_6\_0, r1i1p1 w.r.t. jra55, 1979-2005, all seasons

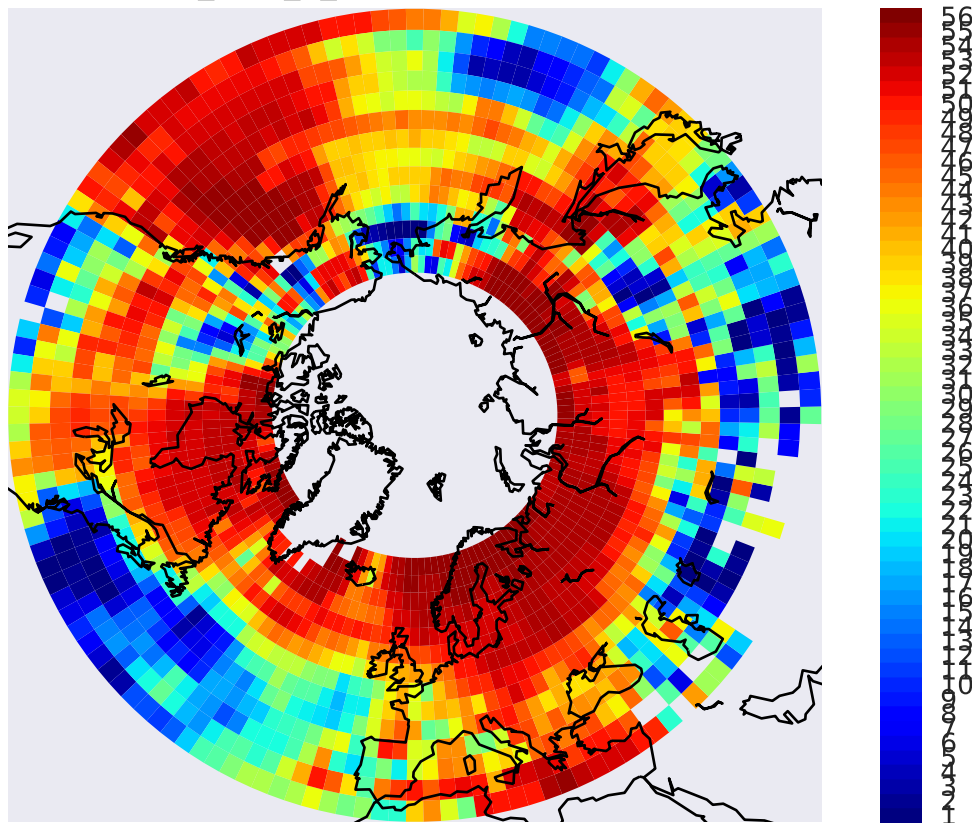

Supplement: Supplementary file 18 [file gmd-15-1375-2022-supplement.zip › supplementary_material/figs-refjra55/maps/rank/rank_csiro_mk3_6_0_r1i1p1_wrt_jra55_nh_1979-2005.pdf]

Performance rank for mpi\_esm\_1\_2\_hr, r1i1p1f1 w.r.t. jra55, 1979-2005, all seasons

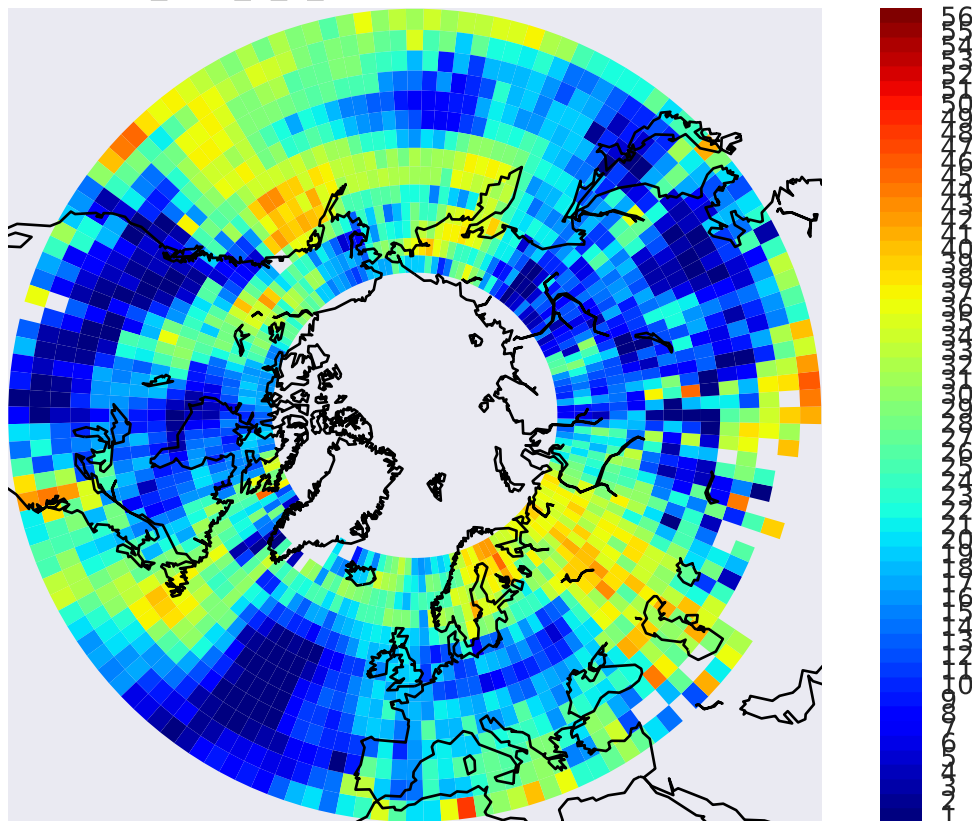

Supplement: Supplementary file 18 [file gmd-15-1375-2022-supplement.zip › supplementary_material/figs-refjra55/maps/rank/rank_mpi_esm_1_2_hr_r1i1p1f1_wrt_jra55_nh_1979-2005.pdf]

Performance rank for miroc6, r3i1p1f1 w.r.t. jra55, 1979-2005, all seasons

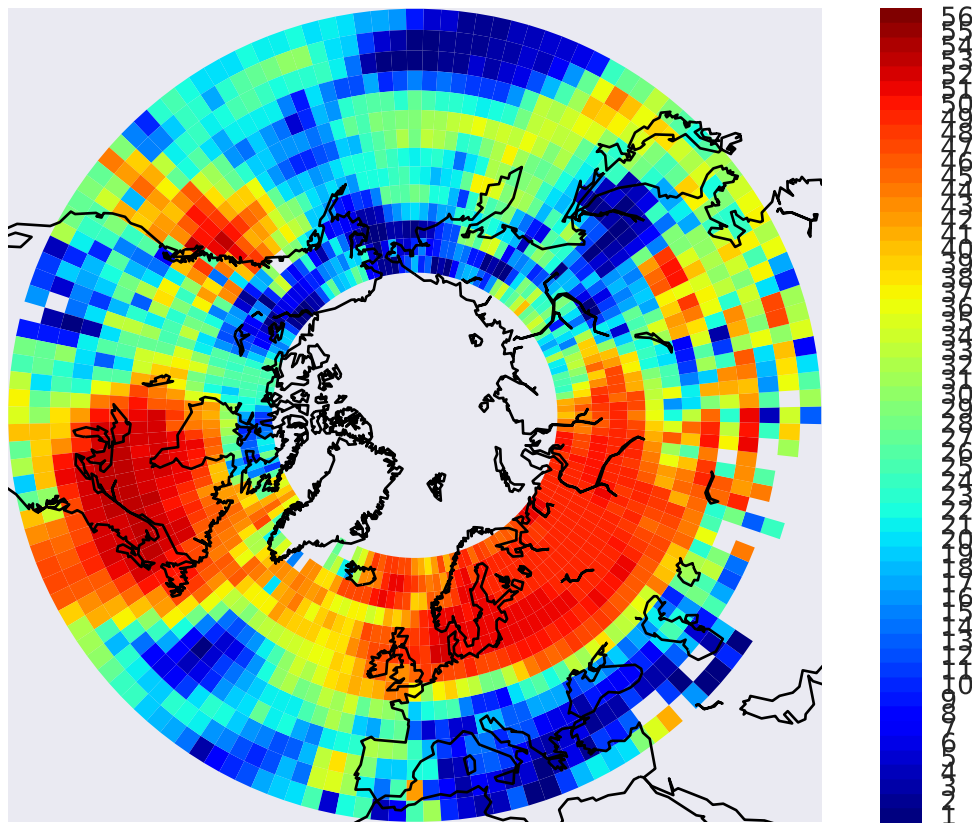

Supplement: Supplementary file 18 [file gmd-15-1375-2022-supplement.zip › supplementary_material/figs-refjra55/maps/rank/rank_miroc6_r3i1p1f1_wrt_jra55_nh_1979-2005.pdf]

Performance rank for gfdl\_cm4, r1i1p1f1 w.r.t. jra55, 1979-2005, all seasons

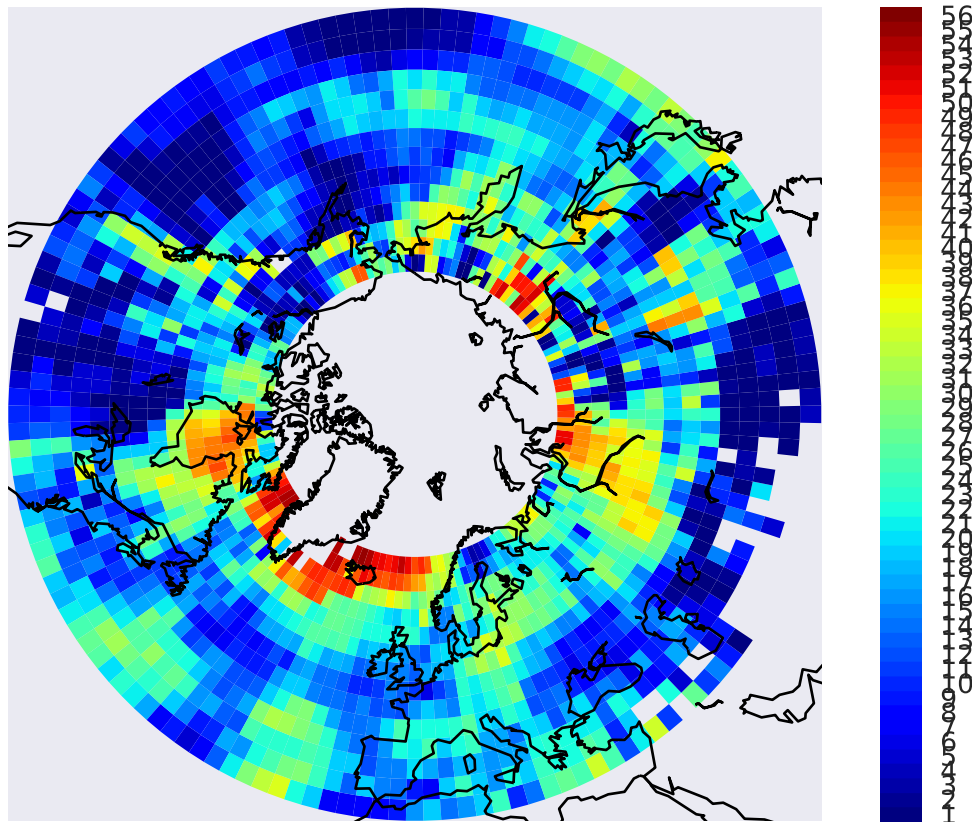

Supplement: Supplementary file 18 [file gmd-15-1375-2022-supplement.zip › supplementary_material/figs-refjra55/maps/rank/rank_gfdl_cm4_r1i1p1f1_wrt_jra55_nh_1979-2005.pdf]

Performance rank for ec\_earth3\_veg\_lr, r1i1p1f1 w.r.t. jra55, 1979-2005, all seasons

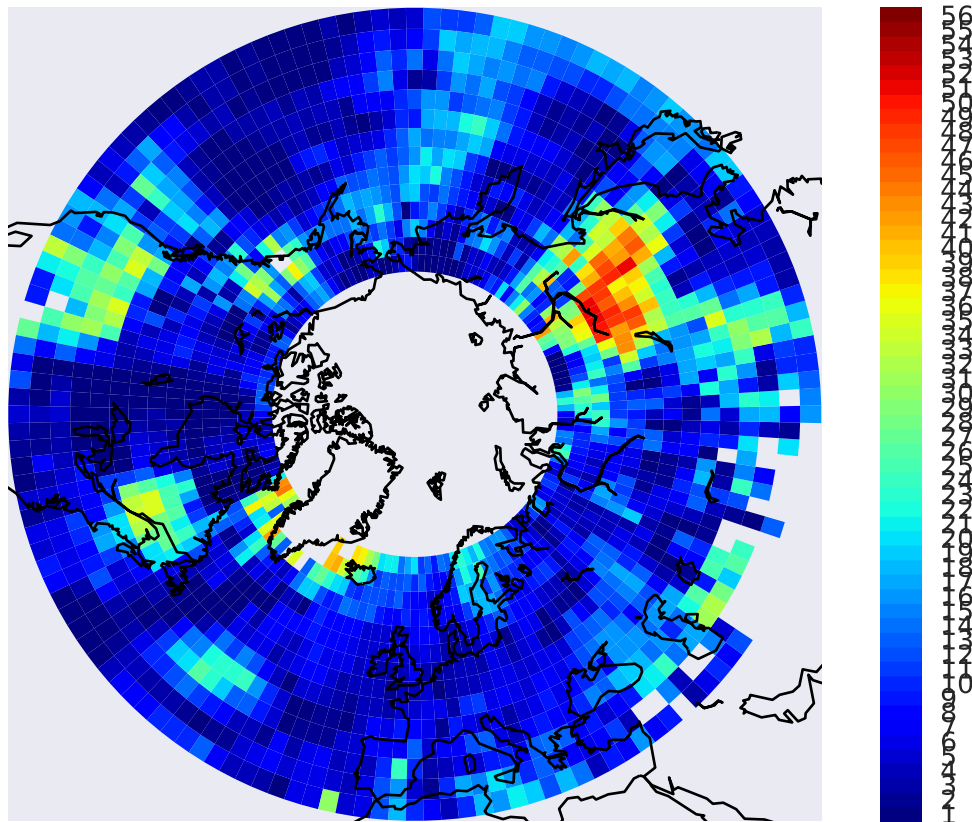

Supplement: Supplementary file 18 [file gmd-15-1375-2022-supplement.zip › supplementary_material/figs-refjra55/maps/rank/rank_ec_earth3_veg_lr_r1i1p1f1_wrt_jra55_nh_1979-2005.pdf]

Performance rank for hadgem2\_cc, rli1p1 w.r.t. jra55, 1979-2005, all seasons

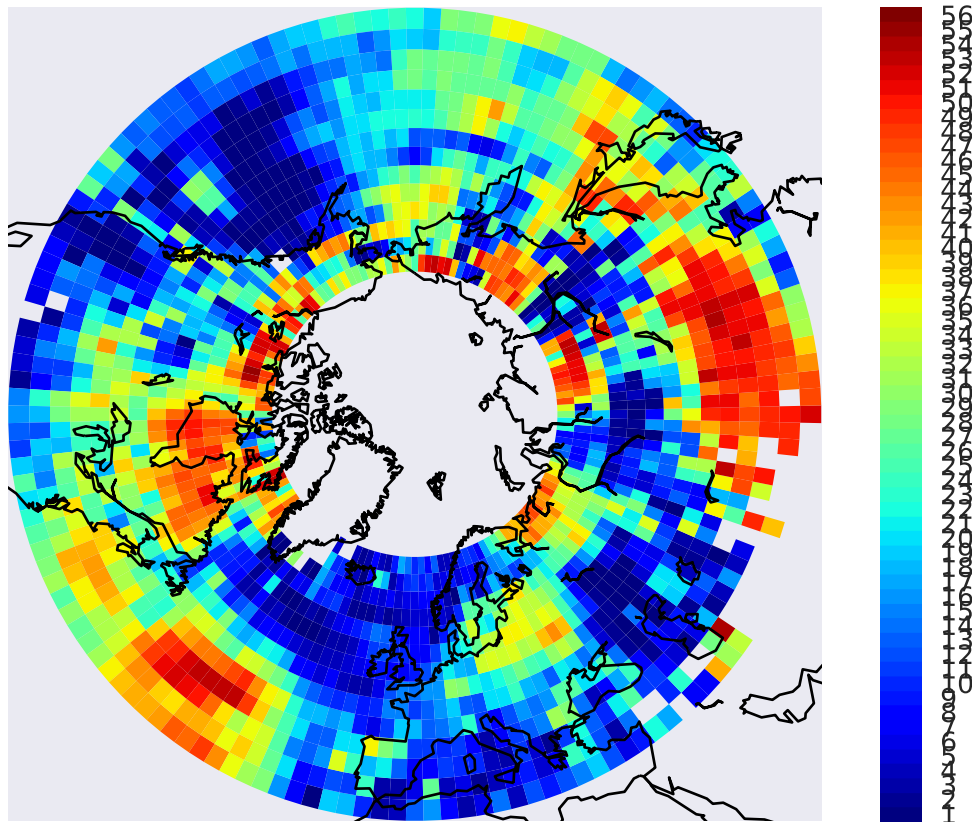

Supplement: Supplementary file 18 [file gmd-15-1375-2022-supplement.zip › supplementary_material/figs-refjra55/maps/rank/rank_hadgem2_cc_r1i1p1_wrt_jra55_nh_1979-2005.pdf]

Performance rank for access\_cm2, r1i1p1f1 w.r.t. jra55, 1979-2005, all seasons

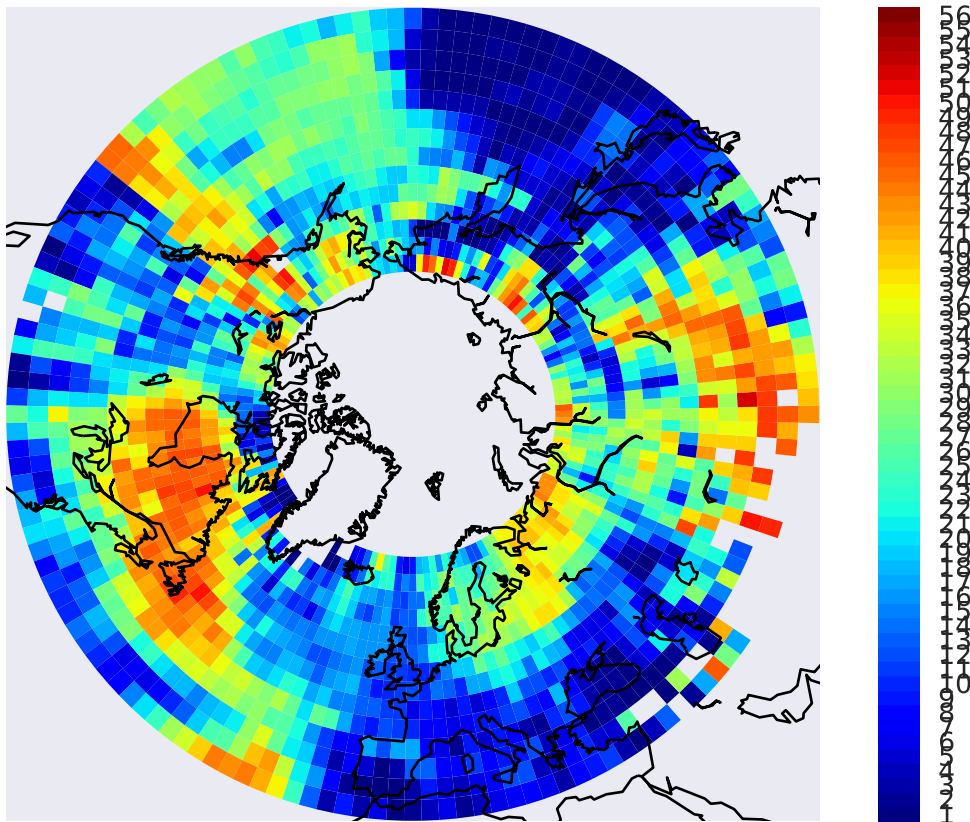

Supplement: Supplementary file 18 [file gmd-15-1375-2022-supplement.zip › supplementary_material/figs-refjra55/maps/rank/rank_access_cm2_r1i1p1f1_wrt_jra55_nh_1979-2005.pdf]

Performance rank for cnrm\_cm6\_1, r1i1p1f2 w.r.t. jra55, 1979-2005, all seasons

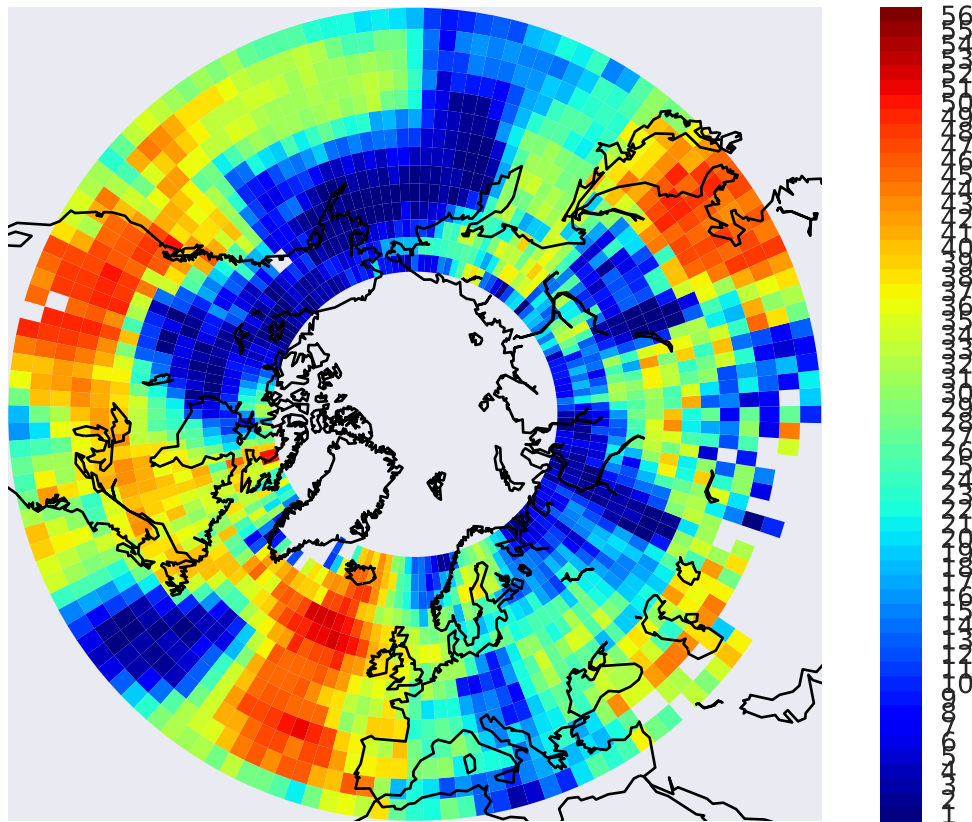

Supplement: Supplementary file 18 [file gmd-15-1375-2022-supplement.zip › supplementary_material/figs-refjra55/maps/rank/rank_cnrm_cm6_1_r1i1p1f2_wrt_jra55_nh_1979-2005.pdf]

Performance rank for iitm\_esm, rli1p1f1 w.r.t. jra55, 1979-2005, all seasons

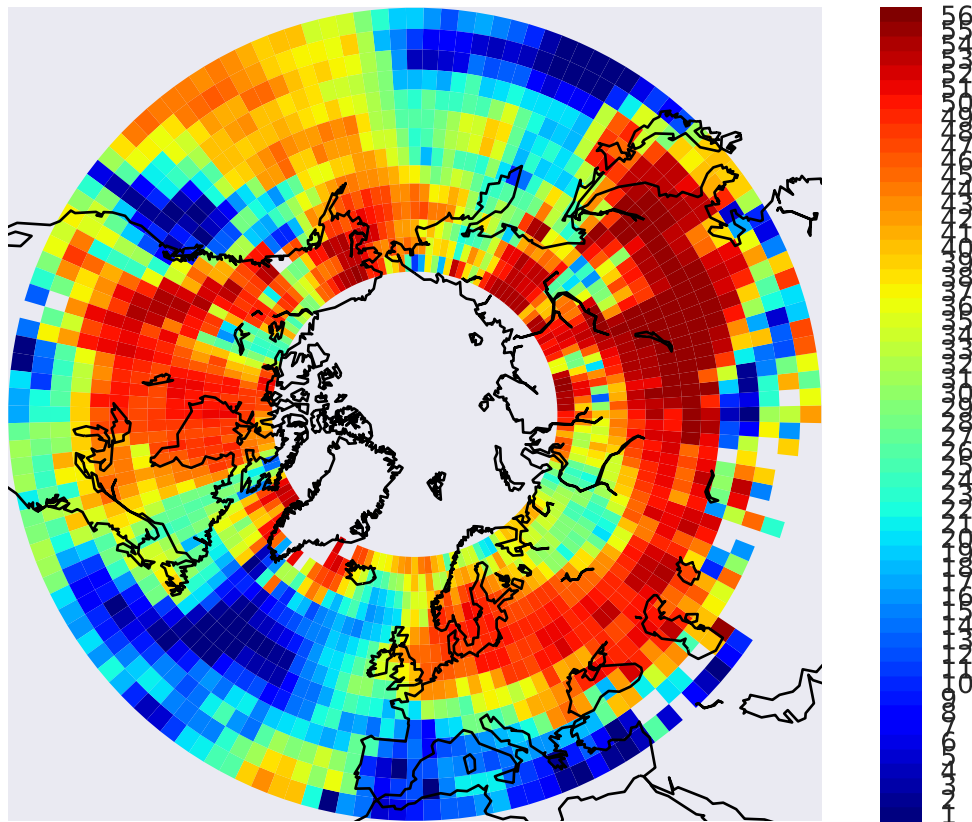

Supplement: Supplementary file 18 [file gmd-15-1375-2022-supplement.zip › supplementary_material/figs-refjra55/maps/rank/rank_iitm_esm_r1i1p1f1_wrt_jra55_nh_1979-2005.pdf]

Performance rank for nesm3, rli1p1f1 w.r.t. jra55, 1979-2005, all seasons

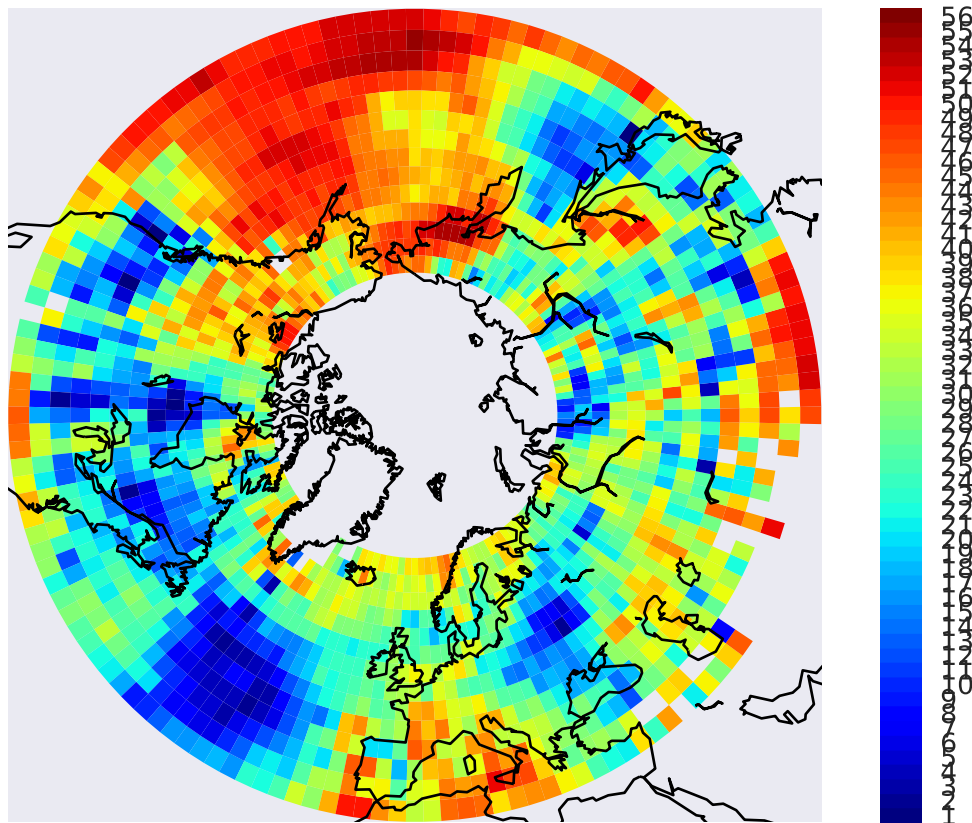

Supplement: Supplementary file 18 [file gmd-15-1375-2022-supplement.zip › supplementary_material/figs-refjra55/maps/rank/rank_nesm3_r1i1p1f1_wrt_jra55_nh_1979-2005.pdf]

Performance rank for noresm2\_lm, rli1p1f1 w.r.t. jra55, 1979-2005, all seasons

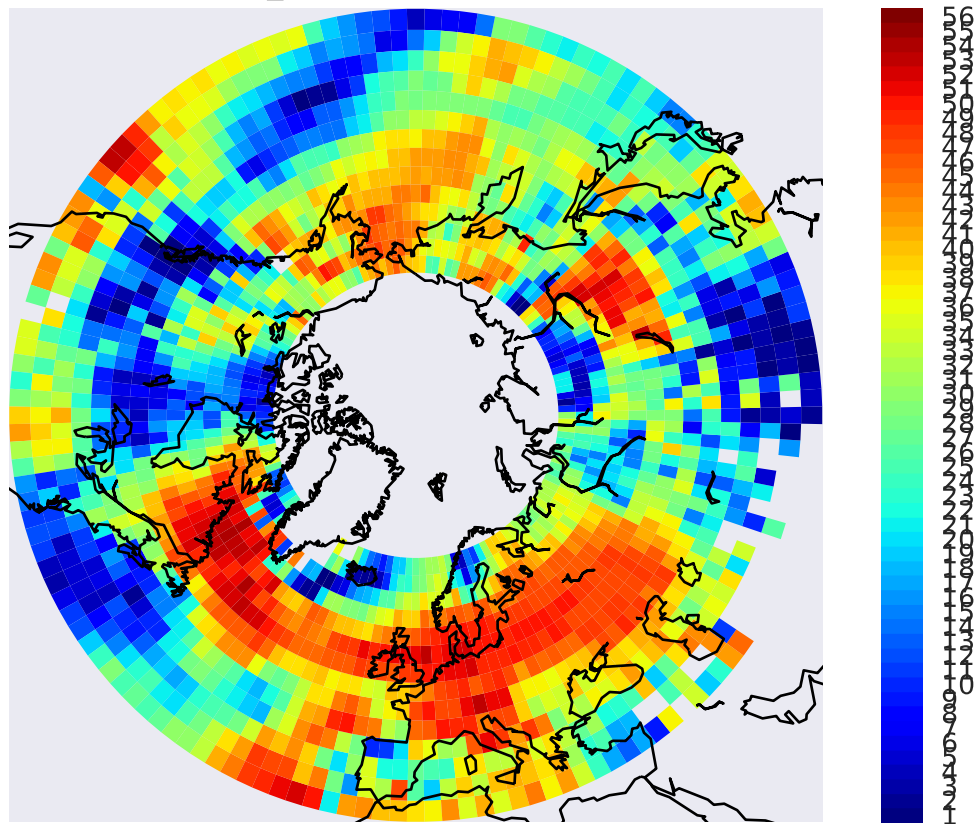

Supplement: Supplementary file 18 [file gmd-15-1375-2022-supplement.zip › supplementary_material/figs-refjra55/maps/rank/rank_noresm2_lm_r1i1p1f1_wrt_jra55_nh_1979-2005.pdf]

Performance rank for miroc5, rli1p1 w.r.t. jra55, 1979-2005, all seasons

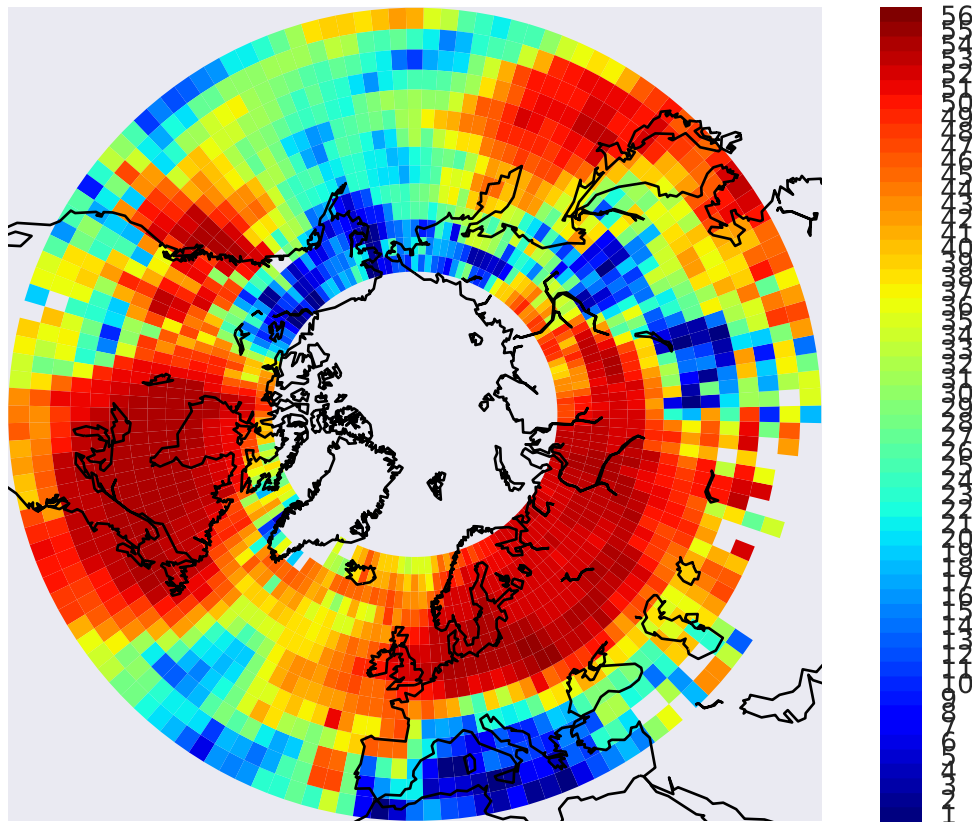

Supplement: Supplementary file 18 [file gmd-15-1375-2022-supplement.zip › supplementary_material/figs-refjra55/maps/rank/rank_miroc5_r1i1p1_wrt_jra55_nh_1979-2005.pdf]

Performance rank for mri\_esm2\_0, r1i1p1f1 w.r.t. jra55, 1979-2005, all seasons

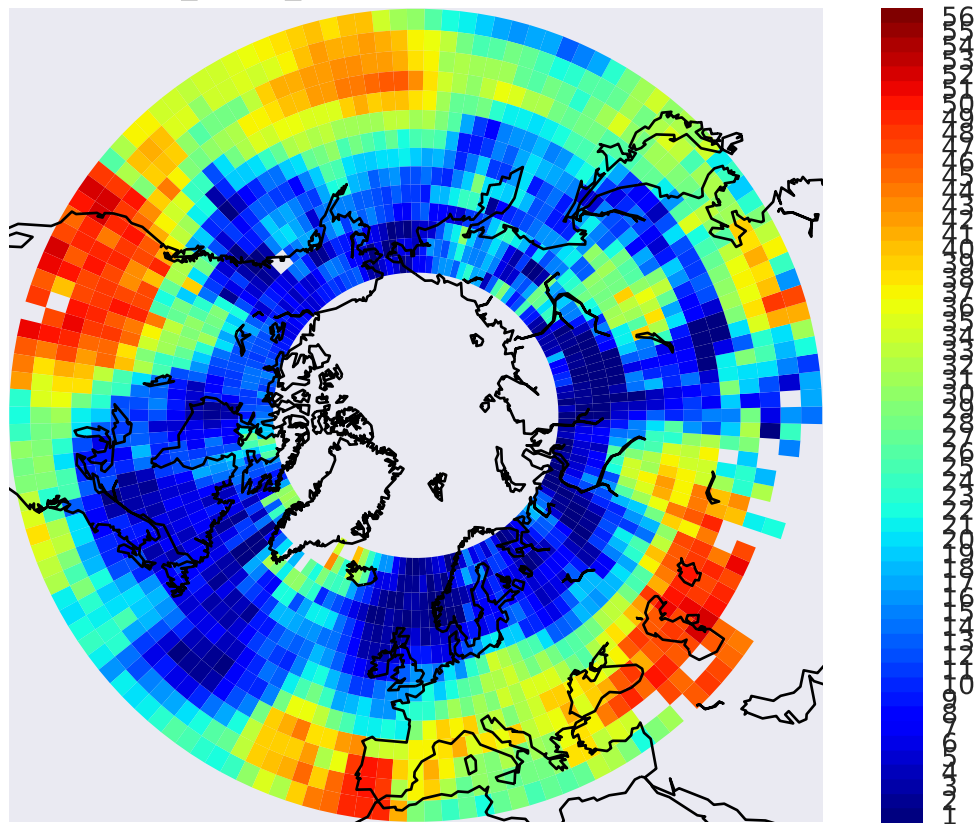

Supplement: Supplementary file 18 [file gmd-15-1375-2022-supplement.zip › supplementary_material/figs-refjra55/maps/rank/rank_mri_esm2_0_r1i1p1f1_wrt_jra55_nh_1979-2005.pdf]

Performance rank for giss\_e2\_1\_g, r1i1p1f1 w.r.t. jra55, 1979-2005, all seasons

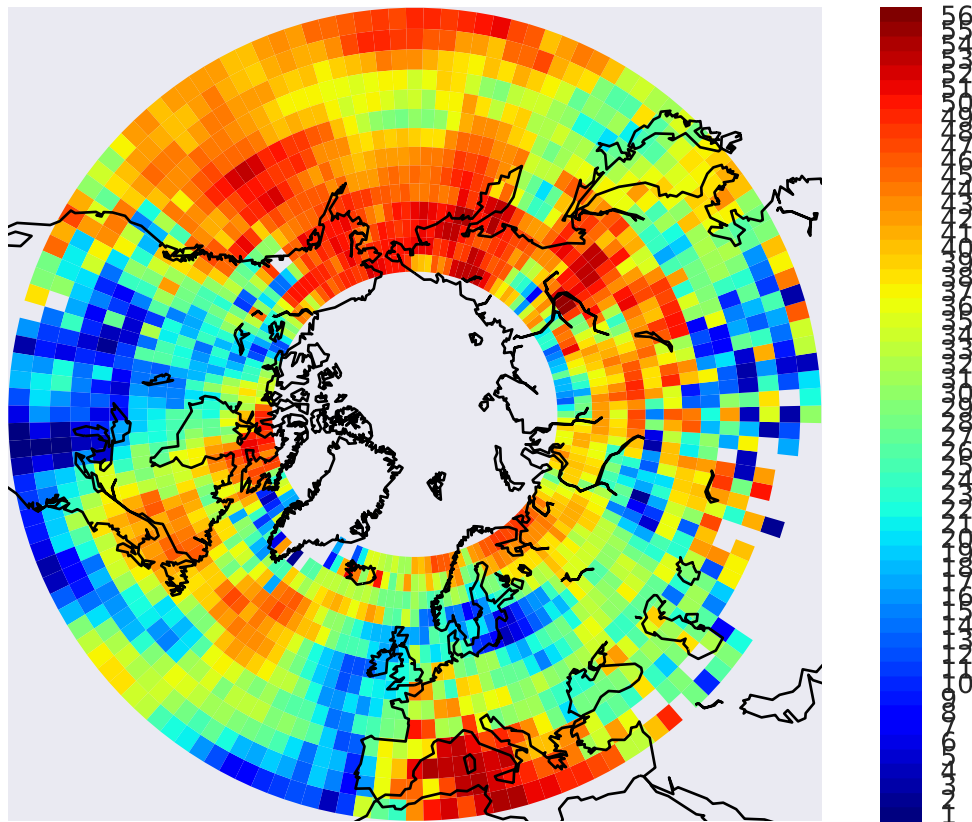

Supplement: Supplementary file 18 [file gmd-15-1375-2022-supplement.zip › supplementary_material/figs-refjra55/maps/rank/rank_giss_e2_1_g_r1i1p1f1_wrt_jra55_nh_1979-2005.pdf]

Performance rank for access\_esm1\_5, r1i1p1f1 w.r.t. jra55, 1979-2005, all seasons

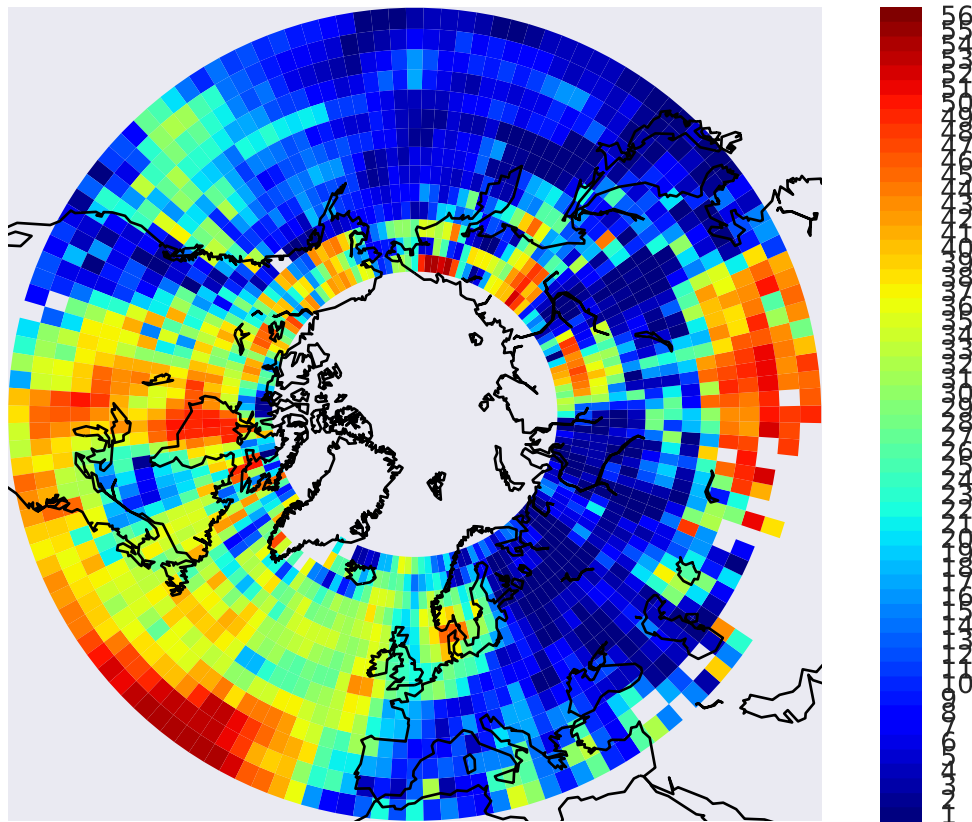

Supplement: Supplementary file 18 [file gmd-15-1375-2022-supplement.zip › supplementary_material/figs-refjra55/maps/rank/rank_access_esm1_5_r1i1p1f1_wrt_jra55_nh_1979-2005.pdf]

Performance rank for canesm2, rli1p1 w.r.t. jra55, 1979-2005, all seasons

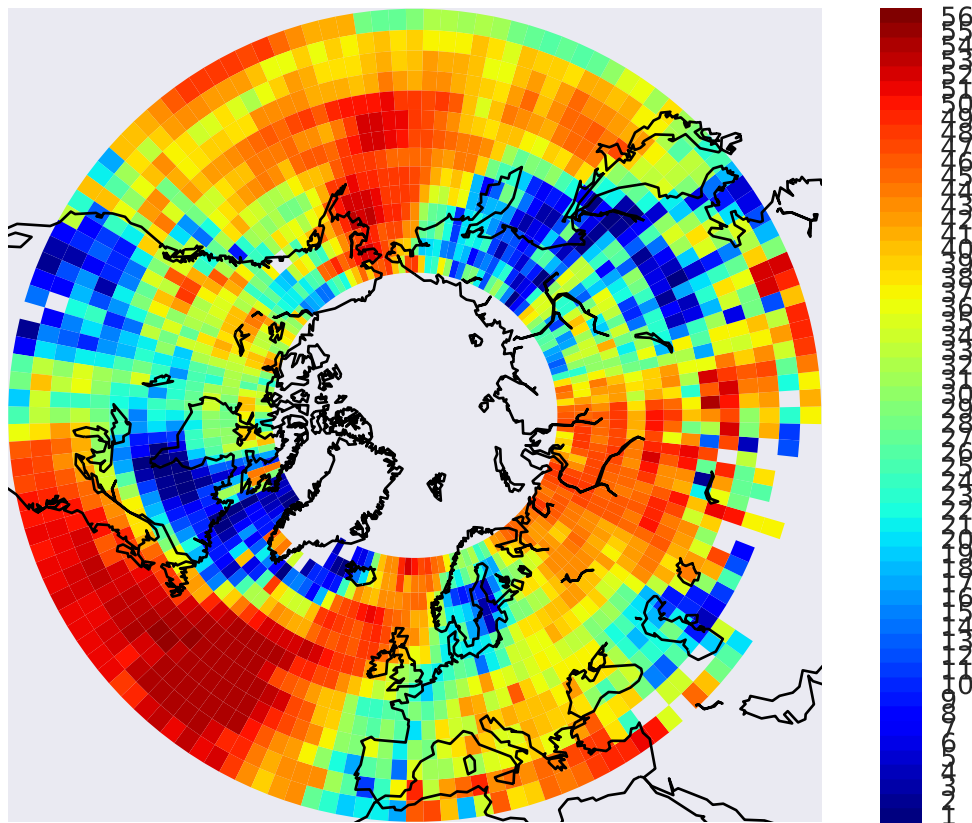

Supplement: Supplementary file 18 [file gmd-15-1375-2022-supplement.zip › supplementary_material/figs-refjra55/maps/rank/rank_canesm2_r1i1p1_wrt_jra55_nh_1979-2005.pdf]

Performance rank for sam0\_unicon, r1i1p1f1 w.r.t. jra55, 1979-2005, all seasons

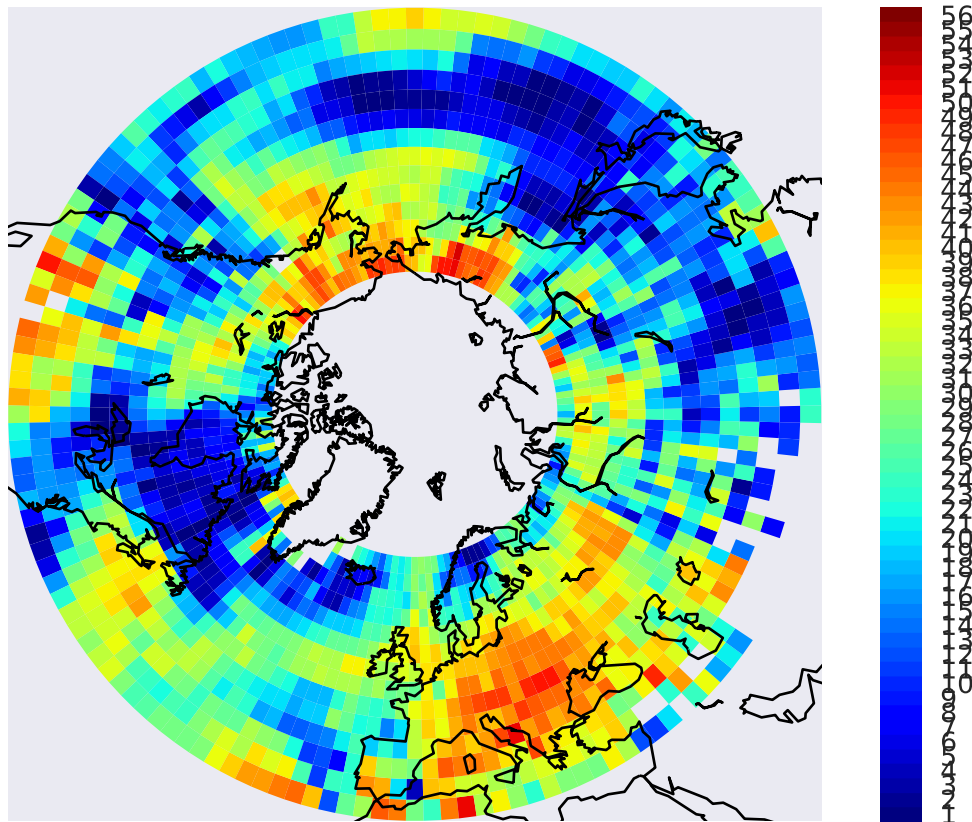

Supplement: Supplementary file 18 [file gmd-15-1375-2022-supplement.zip › supplementary_material/figs-refjra55/maps/rank/rank_sam0_unicon_r1i1p1f1_wrt_jra55_nh_1979-2005.pdf]

Performance rank for access10, r1i1p1 w.r.t. jra55, 1979-2005, all seasons

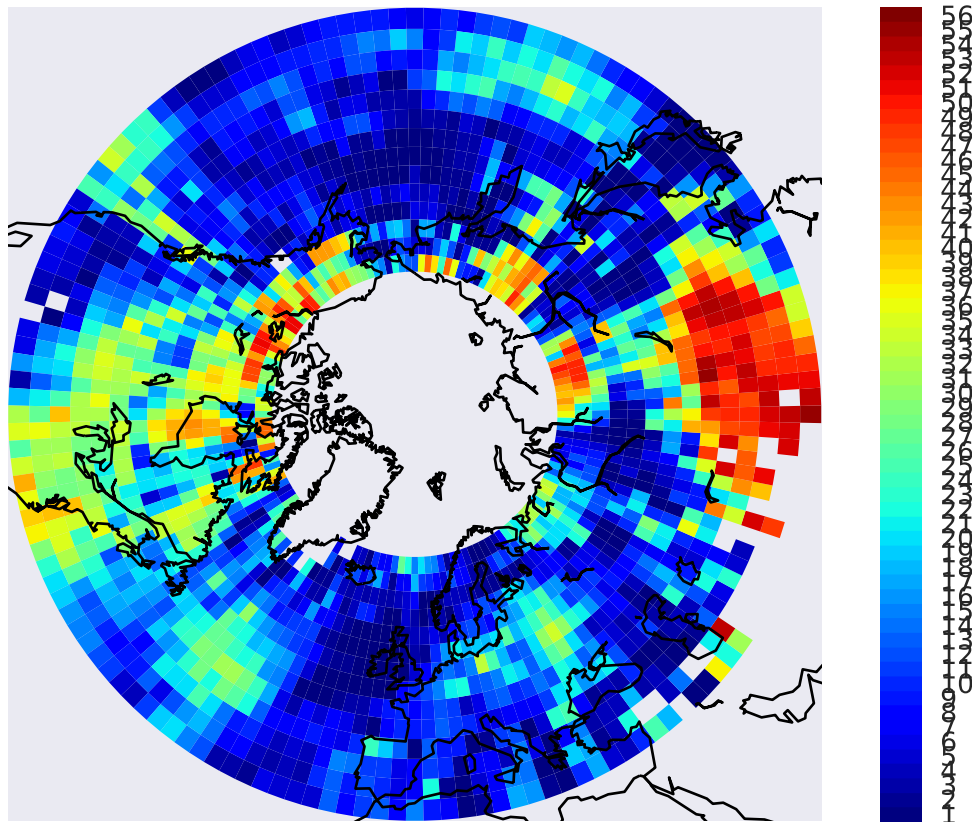

Supplement: Supplementary file 18 [file gmd-15-1375-2022-supplement.zip › supplementary_material/figs-refjra55/maps/rank/rank_access10_r1i1p1_wrt_jra55_nh_1979-2005.pdf]

Performance rank for ipsl\_cm5a\_mr, r1i1p1 w.r.t. jra55, 1979-2005, all seasons

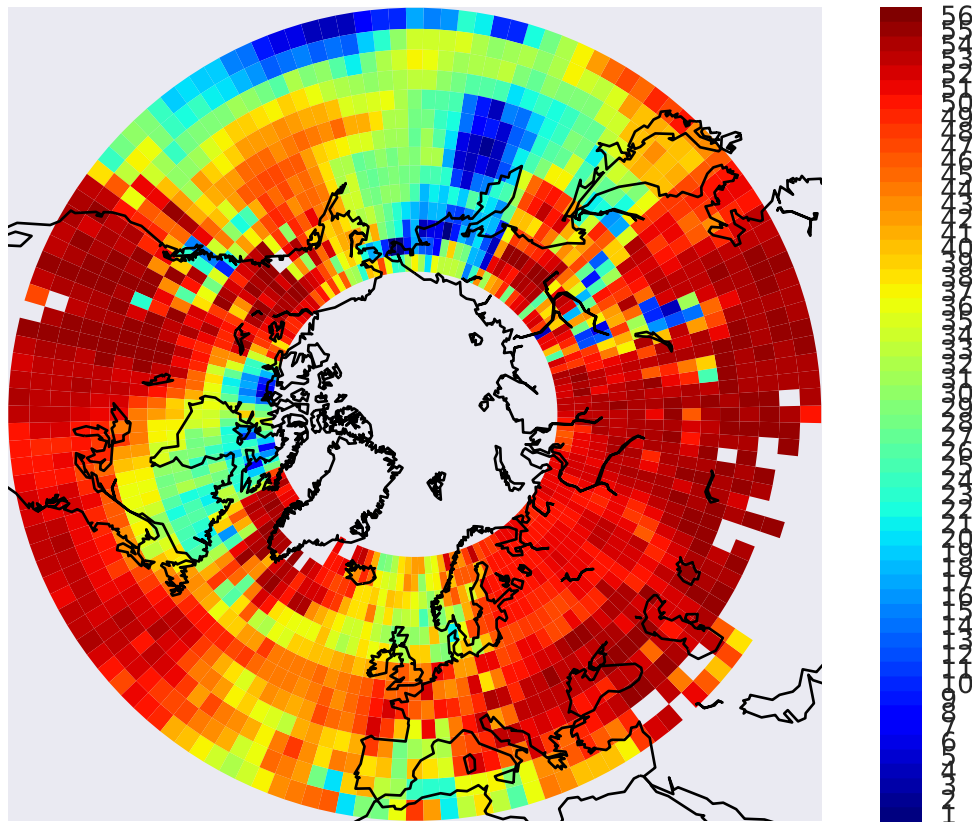

Supplement: Supplementary file 18 [file gmd-15-1375-2022-supplement.zip › supplementary_material/figs-refjra55/maps/rank/rank_ipsl_cm5a_mr_r1i1p1_wrt_jra55_nh_1979-2005.pdf]

Performance rank for kiost\_esm, rli1p1f1 w.r.t. jra55, 1979-2005, all seasons

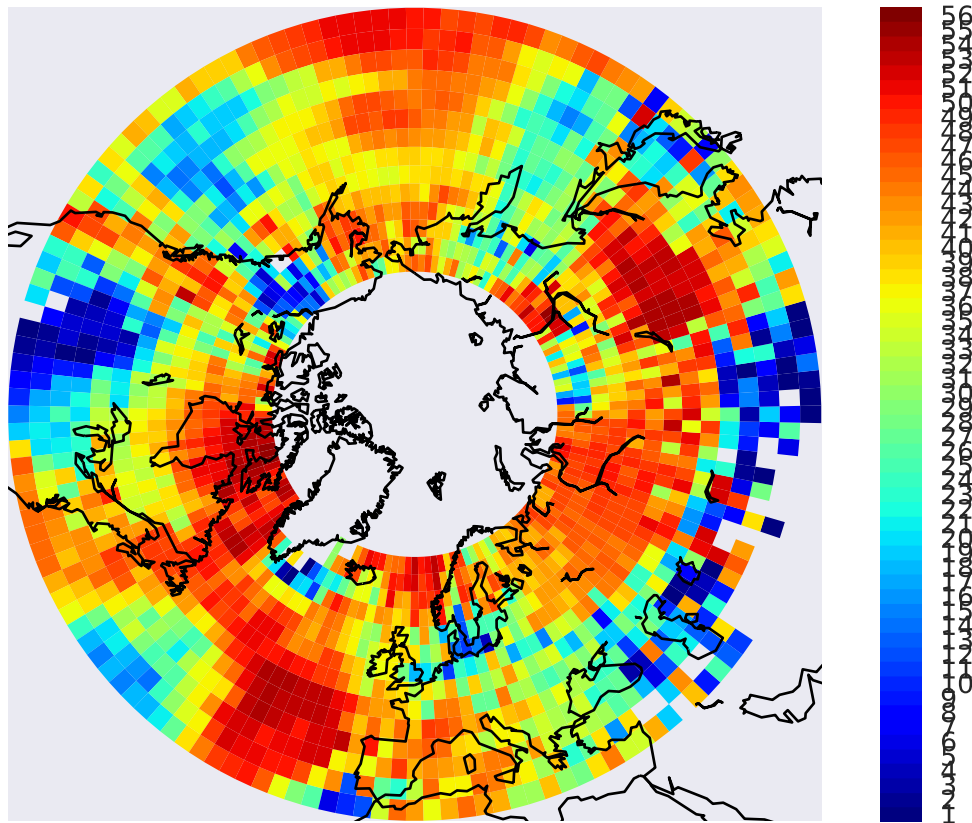

Supplement: Supplementary file 18 [file gmd-15-1375-2022-supplement.zip › supplementary_material/figs-refjra55/maps/rank/rank_kiost_esm_r1i1p1f1_wrt_jra55_nh_1979-2005.pdf]

Performance rank for cmcc\_cm2\_sr5, rli1p1f1 w.r.t. jra55, 1979-2005, all seasons

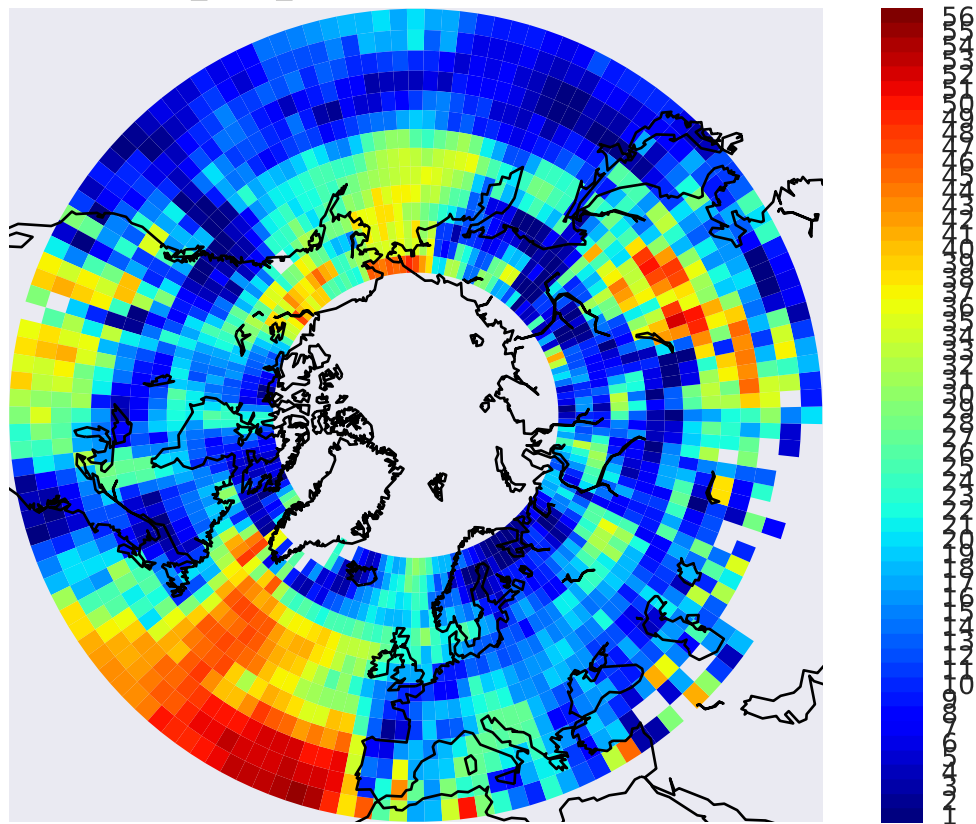

Supplement: Supplementary file 18 [file gmd-15-1375-2022-supplement.zip › supplementary_material/figs-refjra55/maps/rank/rank_cmcc_cm2_sr5_r1i1p1f1_wrt_jra55_nh_1979-2005.pdf]

Performance rank for inm\_cm4, rli1p1 w.r.t. jra55, 1979-2005, all seasons

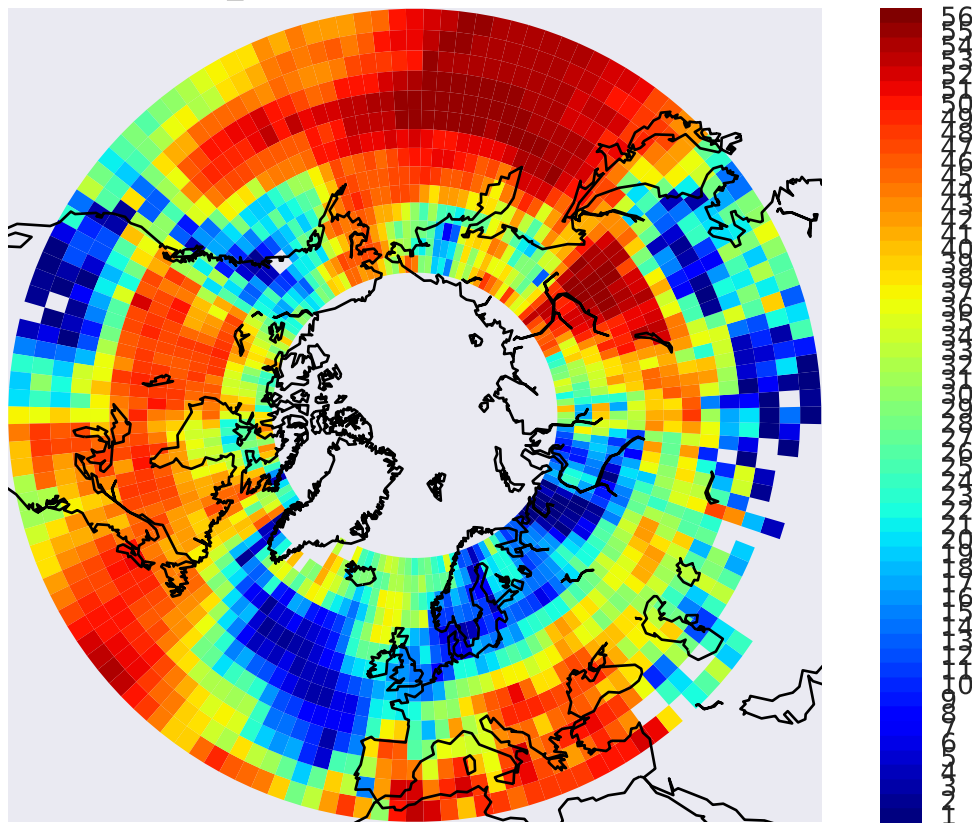

Supplement: Supplementary file 18 [file gmd-15-1375-2022-supplement.zip › supplementary_material/figs-refjra55/maps/rank/rank_inm_cm4_r1i1p1_wrt_jra55_nh_1979-2005.pdf]

Performance rank for access13, r1i1p1 w.r.t. jra55, 1979-2005, all seasons

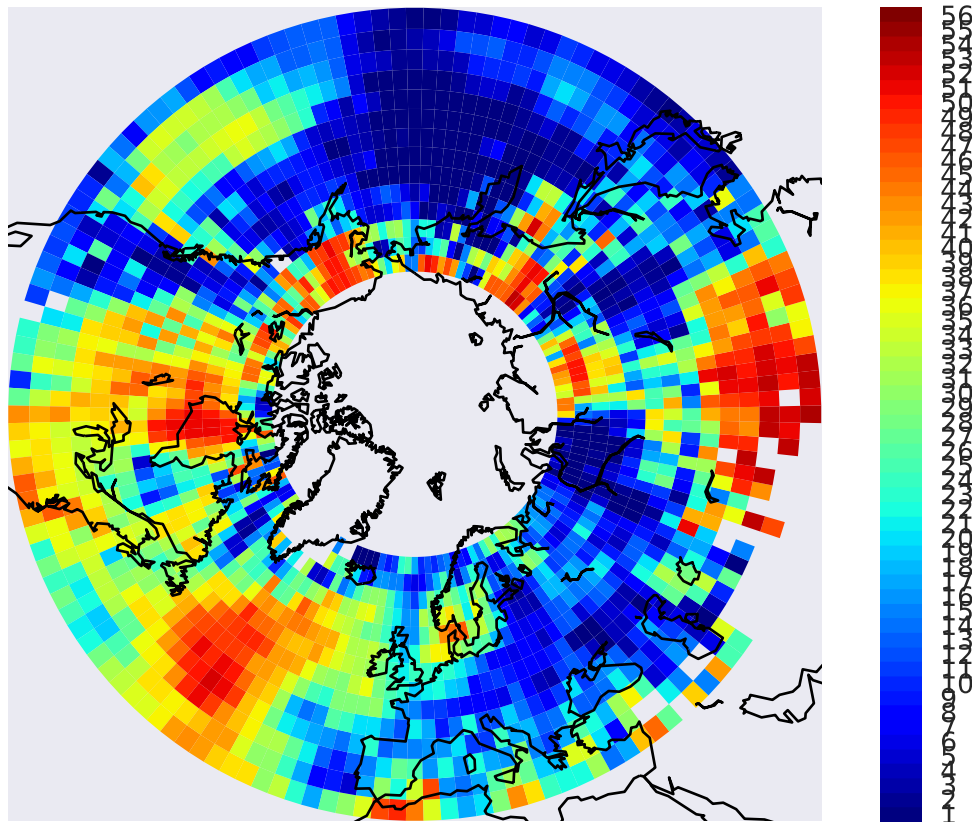

Supplement: Supplementary file 18 [file gmd-15-1375-2022-supplement.zip › supplementary_material/figs-refjra55/maps/rank/rank_access13_r1i1p1_wrt_jra55_nh_1979-2005.pdf]

Performance rank for miroc\_esm, rli1p1 w.r.t. jra55, 1979-2005, all seasons

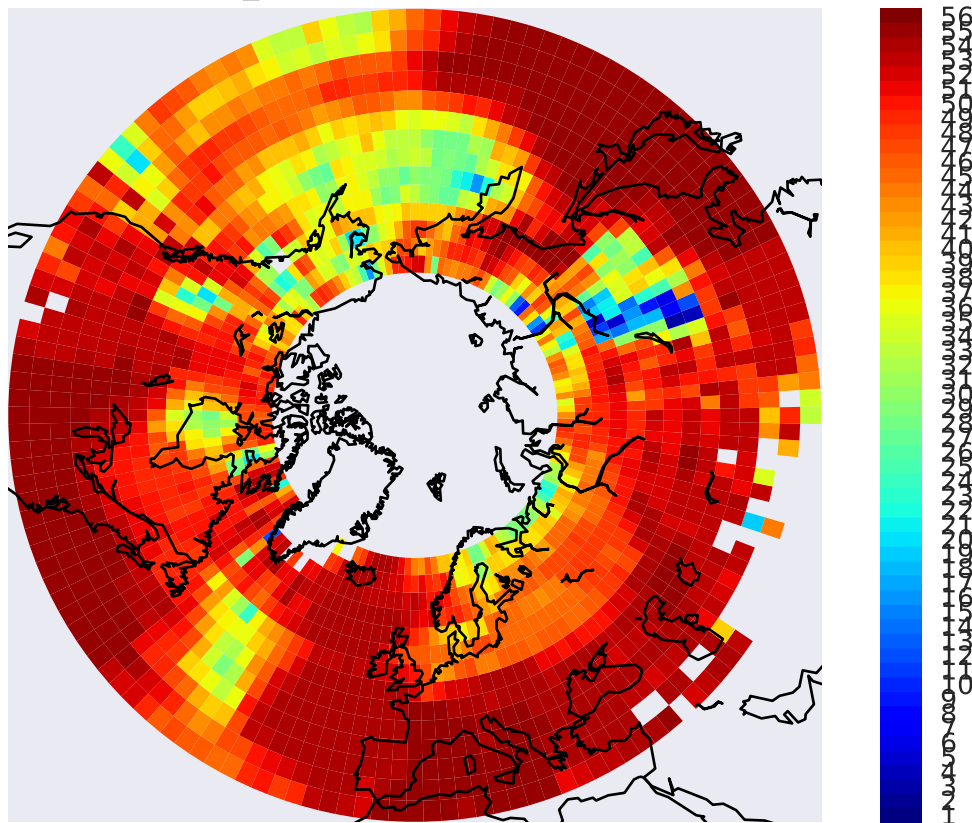

Supplement: Supplementary file 18 [file gmd-15-1375-2022-supplement.zip › supplementary_material/figs-refjra55/maps/rank/rank_miroc_esm_r1i1p1_wrt_jra55_nh_1979-2005.pdf]

Performance rank for mri\_esm1, r1i1p1 w.r.t. jra55, 1979-2005, all seasons

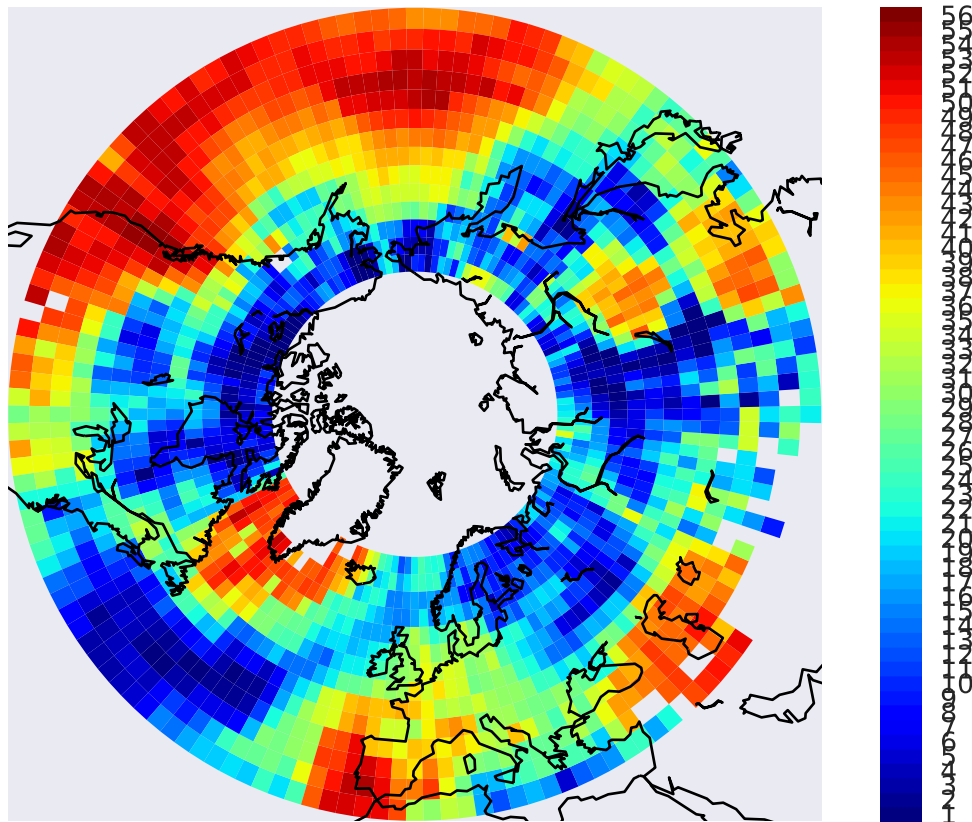

Supplement: Supplementary file 18 [file gmd-15-1375-2022-supplement.zip › supplementary_material/figs-refjra55/maps/rank/rank_mri_esm1_r1i1p1_wrt_jra55_nh_1979-2005.pdf]

Performance rank for giss\_e2\_r, r6i1p1 w.r.t. jra55, 1979-2005, all seasons

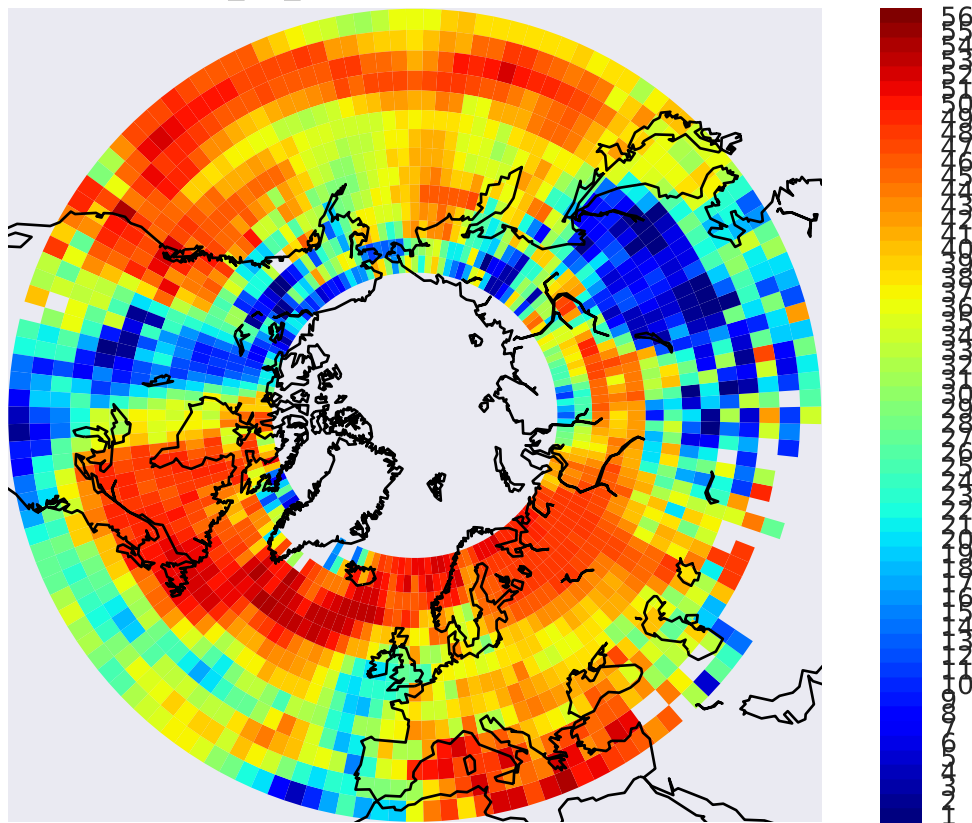

Supplement: Supplementary file 18 [file gmd-15-1375-2022-supplement.zip › supplementary_material/figs-refjra55/maps/rank/rank_giss_e2_r_r6i1p1_wrt_jra55_nh_1979-2005.pdf]

Performance rank for fgoals\_g3, r3i1p1f1 w.r.t. jra55, 1979-2005, all seasons

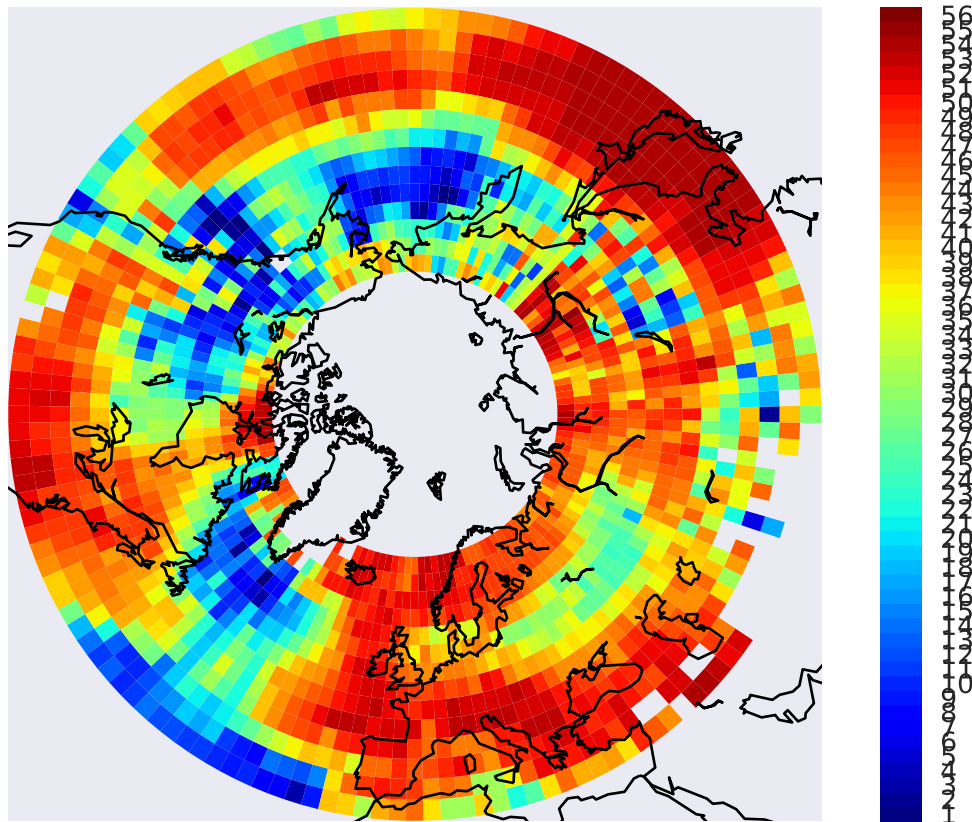

Supplement: Supplementary file 18 [file gmd-15-1375-2022-supplement.zip › supplementary_material/figs-refjra55/maps/rank/rank_fgoals_g3_r3i1p1f1_wrt_jra55_nh_1979-2005.pdf]

Performance rank for fgoals\_g2, r1i1p1 w.r.t. jra55, 1979-2005, all seasons

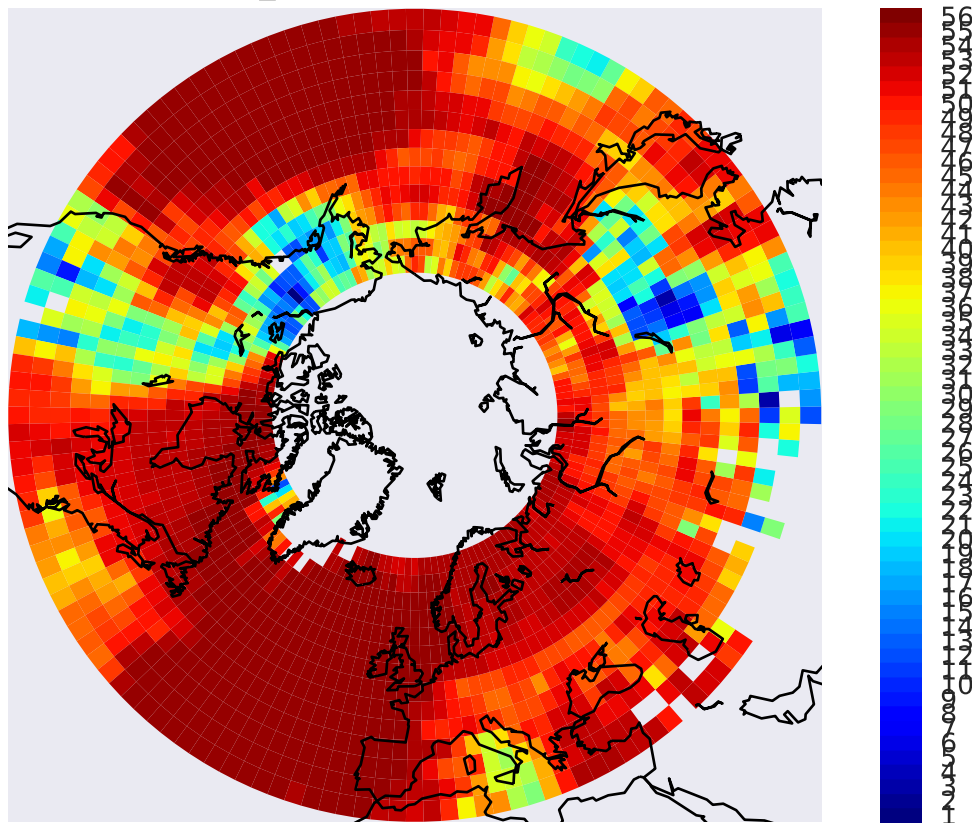

Supplement: Supplementary file 18 [file gmd-15-1375-2022-supplement.zip › supplementary_material/figs-refjra55/maps/rank/rank_fgoals_g2_r1i1p1_wrt_jra55_nh_1979-2005.pdf]

Performance rank for ec\_earth3\_aerchem, r1i1p1f1 w.r.t. jra55, 1979-2005, all seasons

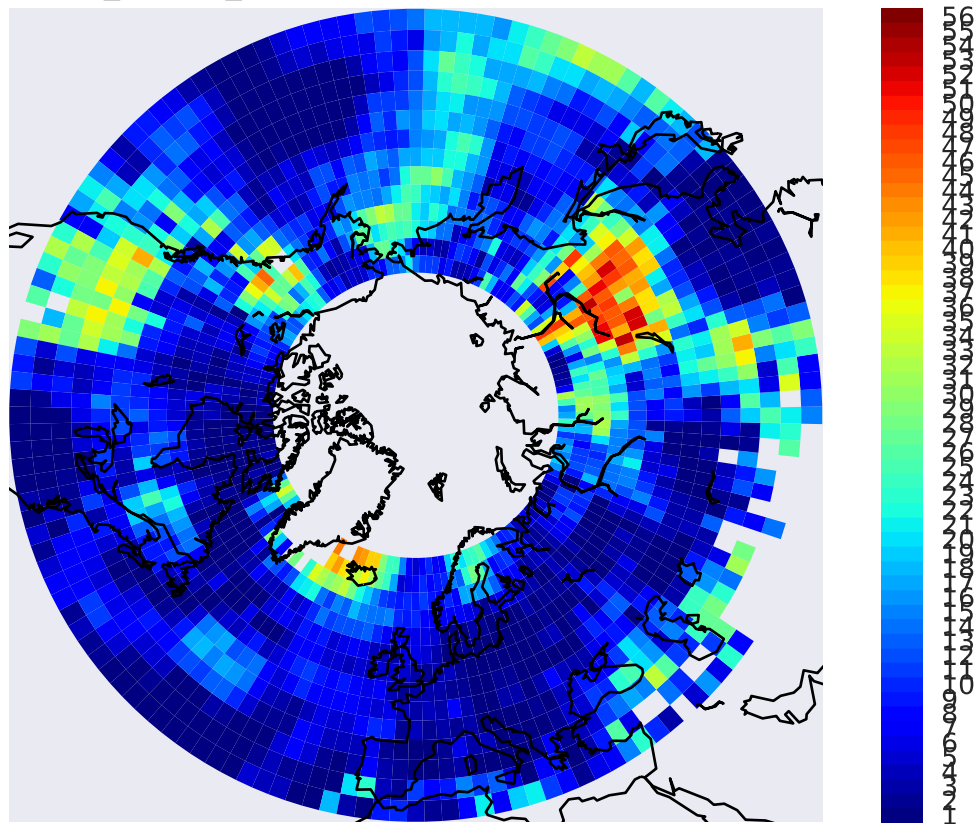

Supplement: Supplementary file 18 [file gmd-15-1375-2022-supplement.zip › supplementary_material/figs-refjra55/maps/rank/rank_ec_earth3_aerchem_r1i1p1f1_wrt_jra55_nh_1979-2005.pdf]

Performance rank for ec\_earth, r12i1p1 w.r.t. jra55, 1979-2005, all seasons

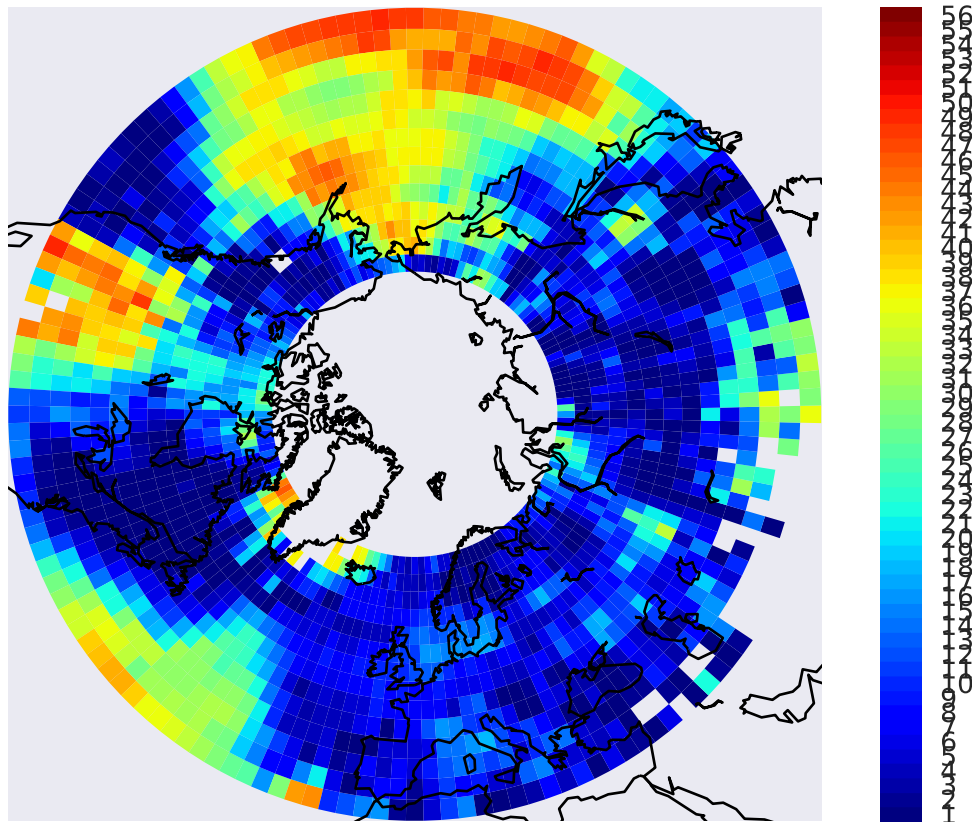

Supplement: Supplementary file 18 [file gmd-15-1375-2022-supplement.zip › supplementary_material/figs-refjra55/maps/rank/rank_ec_earth_r12i1p1_wrt_jra55_nh_1979-2005.pdf]

Performance rank for cnrm\_esm2\_1, r1i1p1f2 w.r.t. jra55, 1979-2005, all seasons

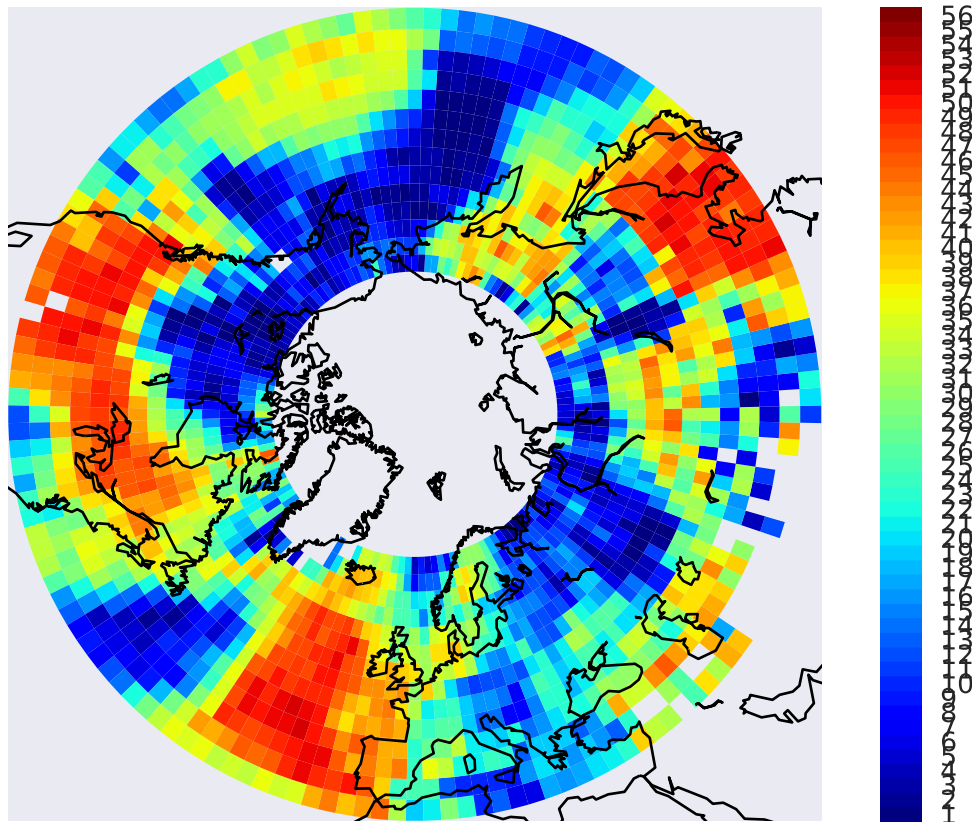

Supplement: Supplementary file 18 [file gmd-15-1375-2022-supplement.zip › supplementary_material/figs-refjra55/maps/rank/rank_cnrm_esm2_1_r1i1p1f2_wrt_jra55_nh_1979-2005.pdf]

Performance rank for noresm1\_m, r1i1p1 w.r.t. jra55, 1979-2005, all seasons

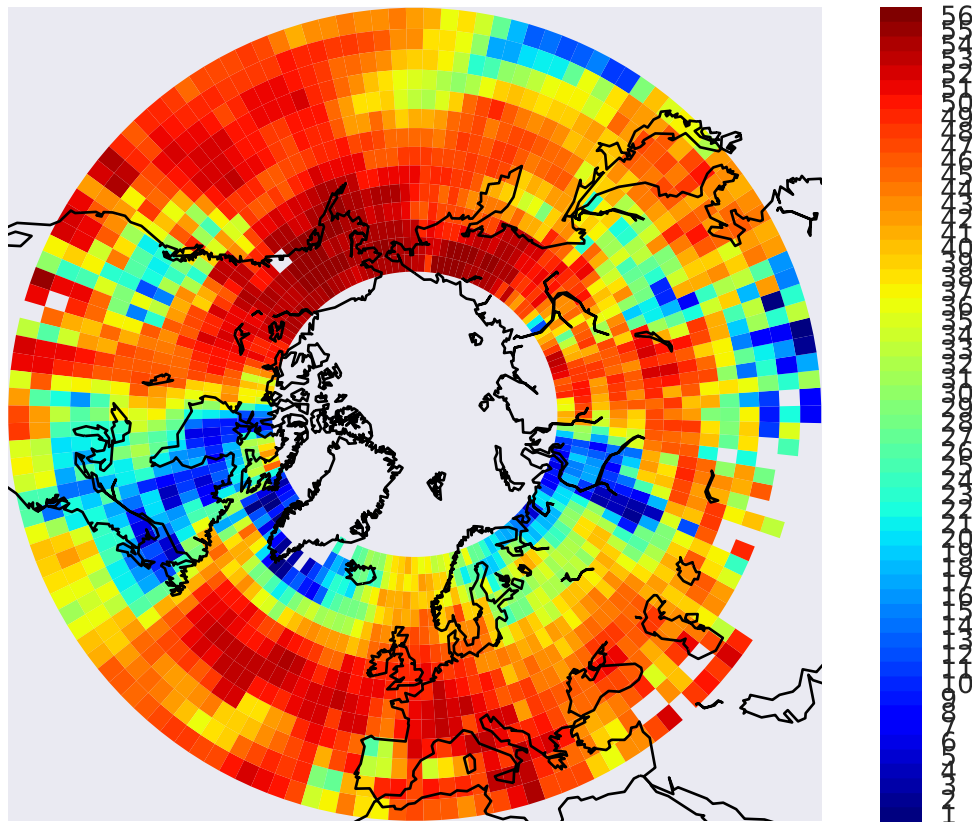

Supplement: Supplementary file 18 [file gmd-15-1375-2022-supplement.zip › supplementary_material/figs-refjra55/maps/rank/rank_noresm1_m_r1i1p1_wrt_jra55_nh_1979-2005.pdf]

Performance rank for noresm2\_mm, r1i1p1f1 w.r.t. jra55, 1979-2005, all seasons

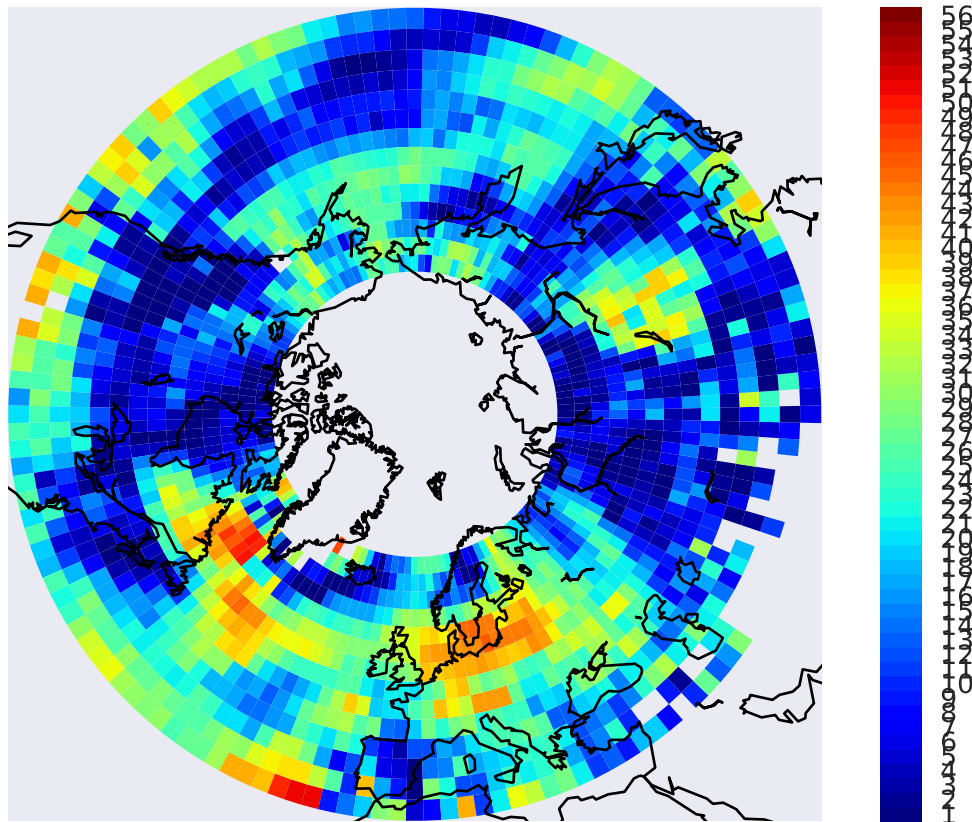

Supplement: Supplementary file 18 [file gmd-15-1375-2022-supplement.zip › supplementary_material/figs-refjra55/maps/rank/rank_noresm2_mm_r1i1p1f1_wrt_jra55_nh_1979-2005.pdf]

Performance rank for hadgem3\_gc31\_mm, rli1p1f3 w.r.t. jra55, 1979-2005, all seasons

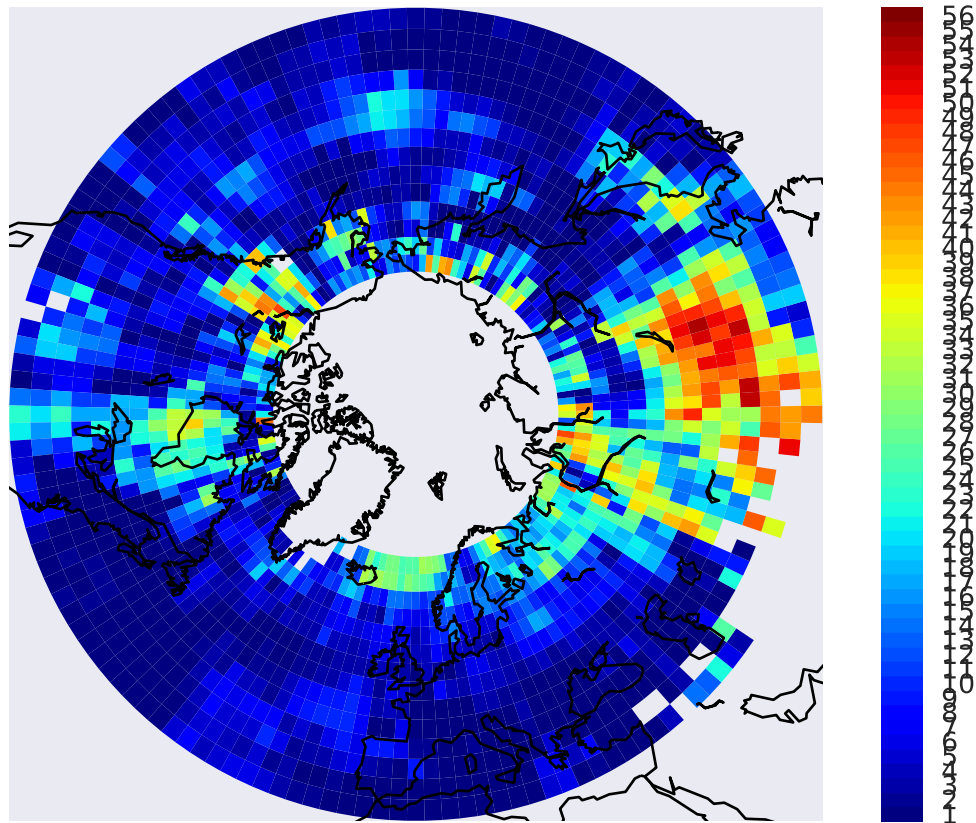

Supplement: Supplementary file 18 [file gmd-15-1375-2022-supplement.zip › supplementary_material/figs-refjra55/maps/rank/rank_hadgem3_gc31_mm_r1i1p1f3_wrt_jra55_nh_1979-2005.pdf]

Performance rank for bcc\_csm1\_1, r1i1p1 w.r.t. jra55, 1979-2005, all seasons

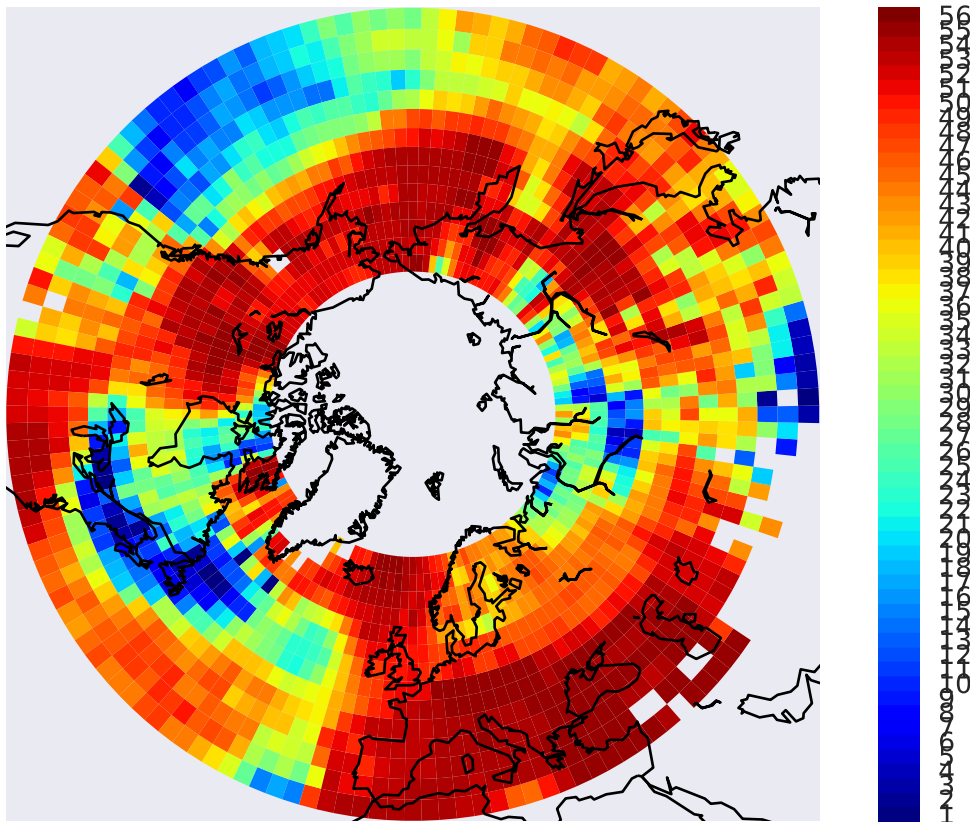

Supplement: Supplementary file 18 [file gmd-15-1375-2022-supplement.zip › supplementary_material/figs-refjra55/maps/rank/rank_bcc_csm1_1_r1i1p1_wrt_jra55_nh_1979-2005.pdf]

Performance rank for ipsl\_cm6a\_lr, r1i1p1f1 w.r.t. jra55, 1979-2005, all seasons

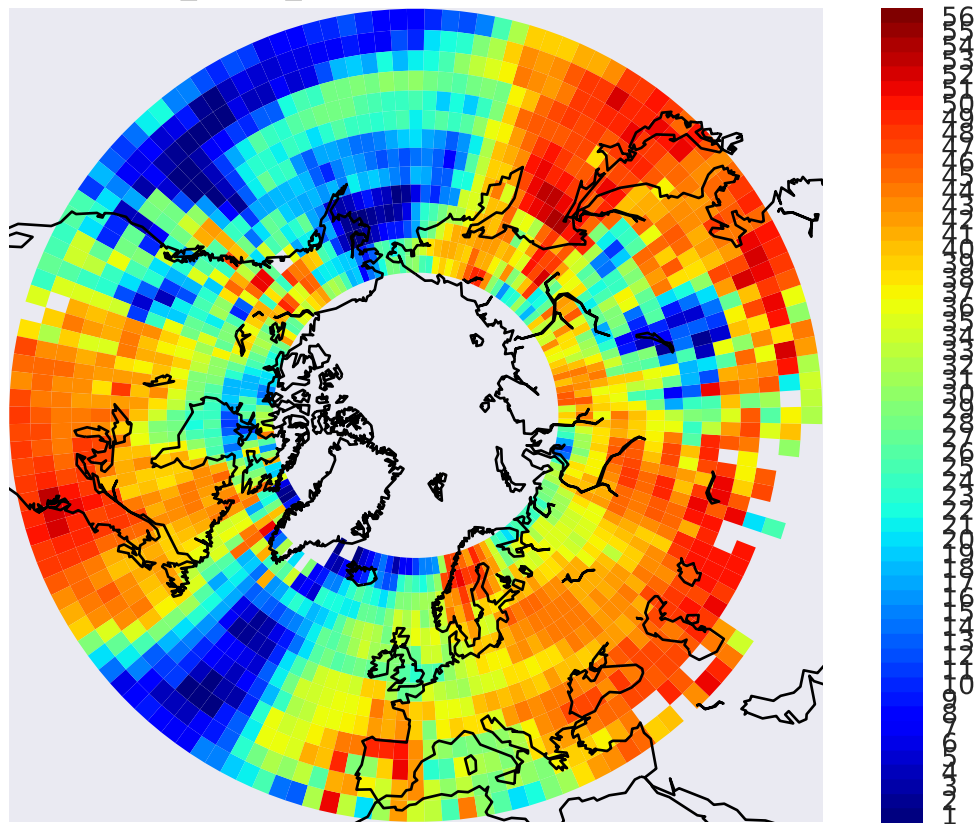

Supplement: Supplementary file 18 [file gmd-15-1375-2022-supplement.zip › supplementary_material/figs-refjra55/maps/rank/rank_ipsl_cm6a_lr_r1i1p1f1_wrt_jra55_nh_1979-2005.pdf]

Performance rank for mpi\_esm\_1\_2\_ham, rli1p1f1 w.r.t. jra55, 1979-2005, all seasons

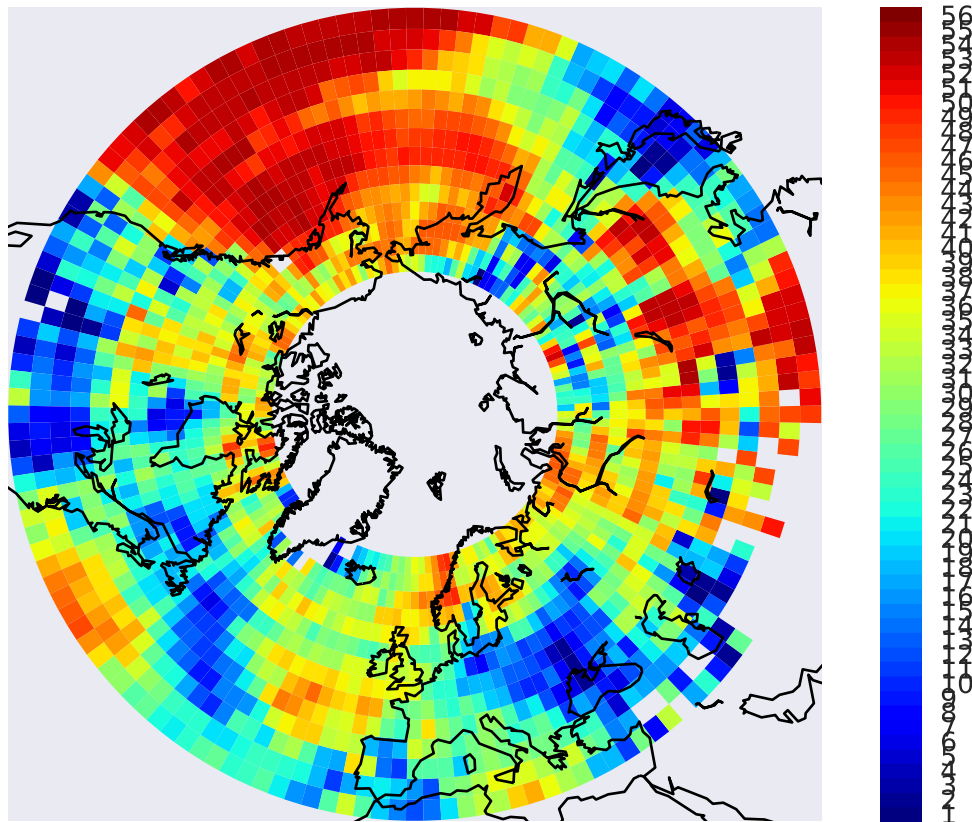

Supplement: Supplementary file 18 [file gmd-15-1375-2022-supplement.zip › supplementary_material/figs-refjra55/maps/rank/rank_mpi_esm_1_2_ham_r1i1p1f1_wrt_jra55_nh_1979-2005.pdf]

MAE, mpi\_esm\_mr, rli1p1 w.r.t. jra55, 1979-2005, all seasons

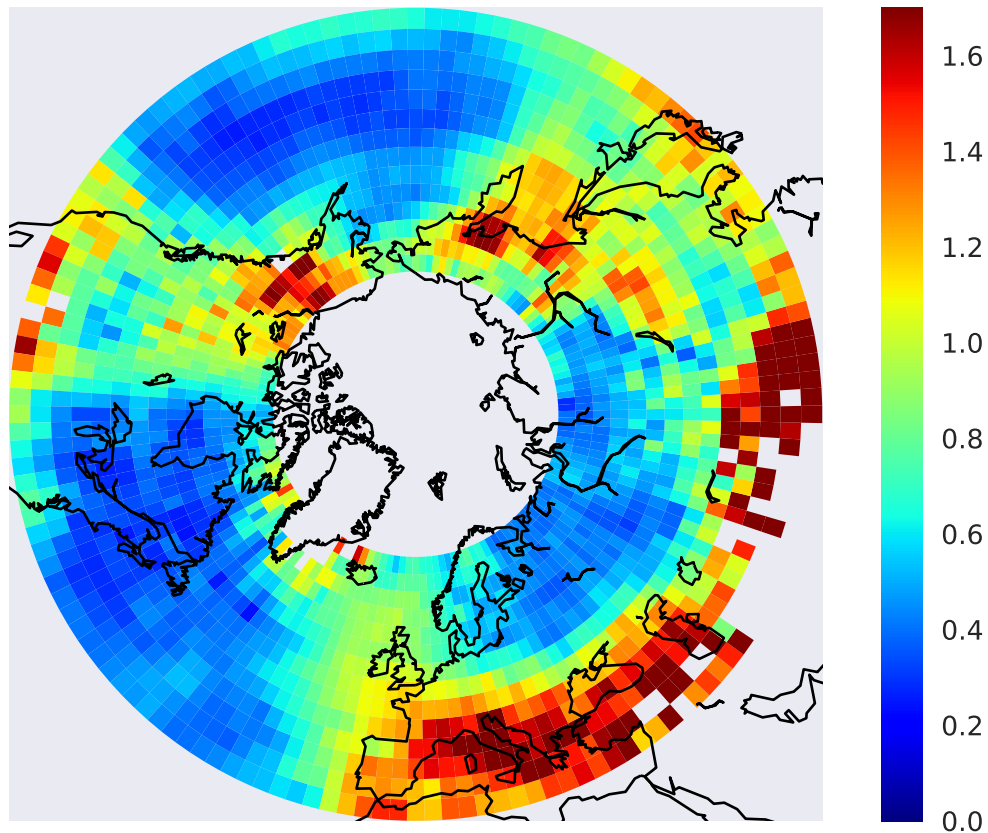

Supplement: Supplementary file 18 [file gmd-15-1375-2022-supplement.zip › supplementary_material/figs-refjra55/maps/mae/MAE_mpi_esm_mr_r1i1p1_wrt_jra55_nh_1979-2005.pdf]

MAE, miroc\_es2l, r5i1p1f2 w.r.t. jra55, 1979-2005, all seasons

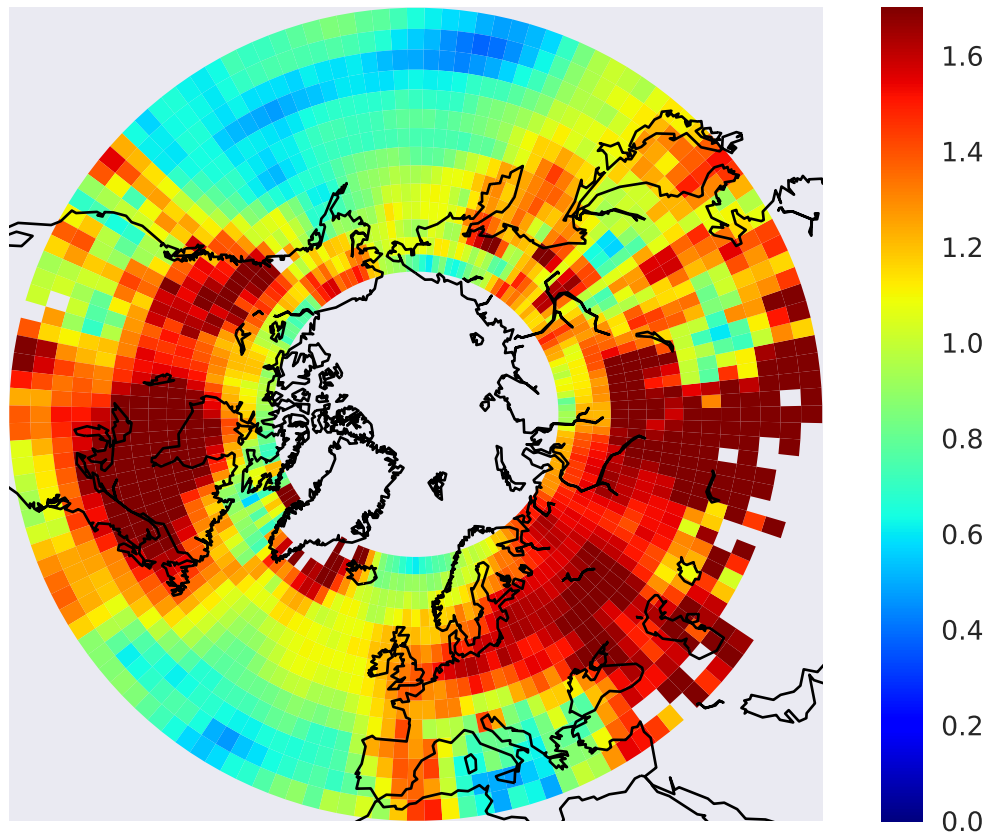

Supplement: Supplementary file 18 [file gmd-15-1375-2022-supplement.zip › supplementary_material/figs-refjra55/maps/mae/MAE_miroc_es2l_r5i1p1f2_wrt_jra55_nh_1979-2005.pdf]

MAE, miroc6, r3i1p1f1 w.r.t. jra55, 1979-2005, all seasons

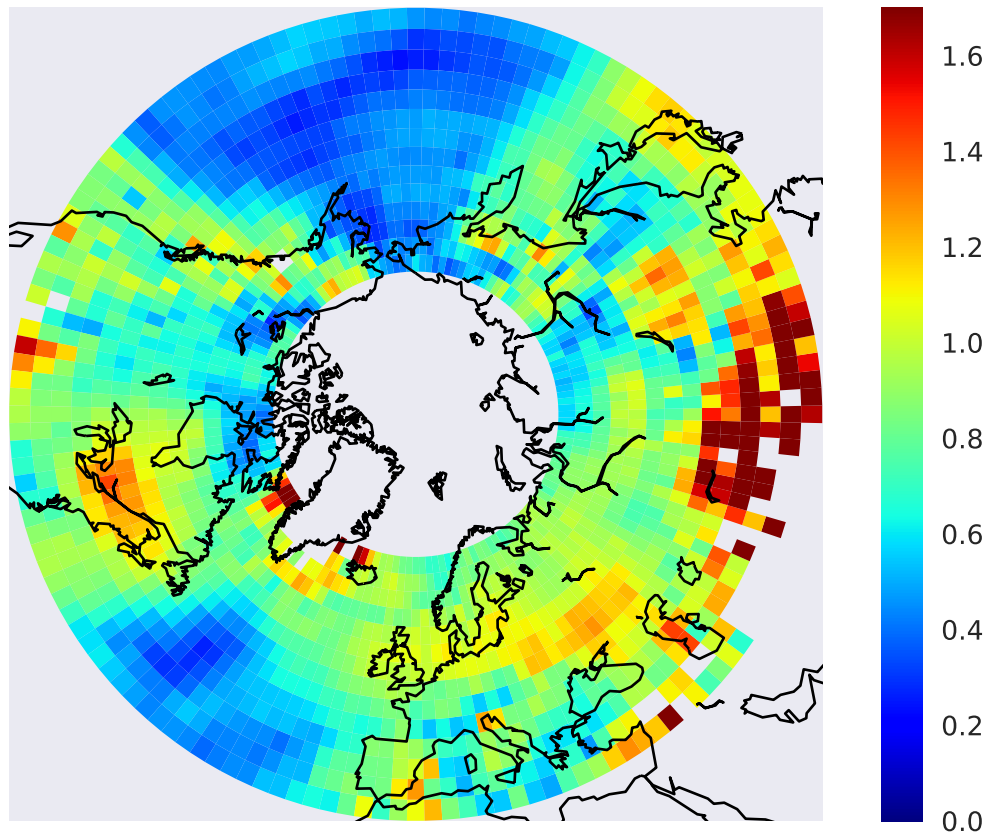

Supplement: Supplementary file 18 [file gmd-15-1375-2022-supplement.zip › supplementary_material/figs-refjra55/maps/mae/MAE_miroc6_r3i1p1f1_wrt_jra55_nh_1979-2005.pdf]

MAE, mpi\_esm\_lr, r1i1p1 w.r.t. jra55, 1979-2005, all seasons

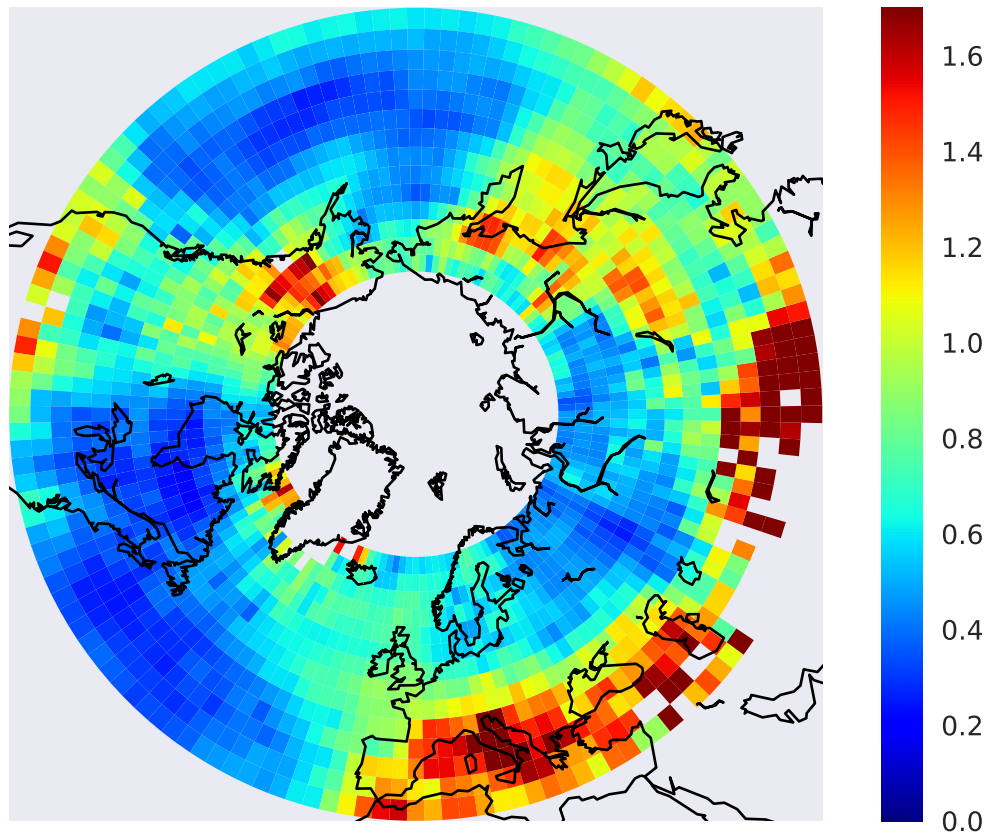

Supplement: Supplementary file 18 [file gmd-15-1375-2022-supplement.zip › supplementary_material/figs-refjra55/maps/mae/MAE_mpi_esm_lr_r1i1p1_wrt_jra55_nh_1979-2005.pdf]

MAE, ipsl\_cm5a\_mr, r1i1p1 w.r.t. jra55, 1979-2005, all seasons

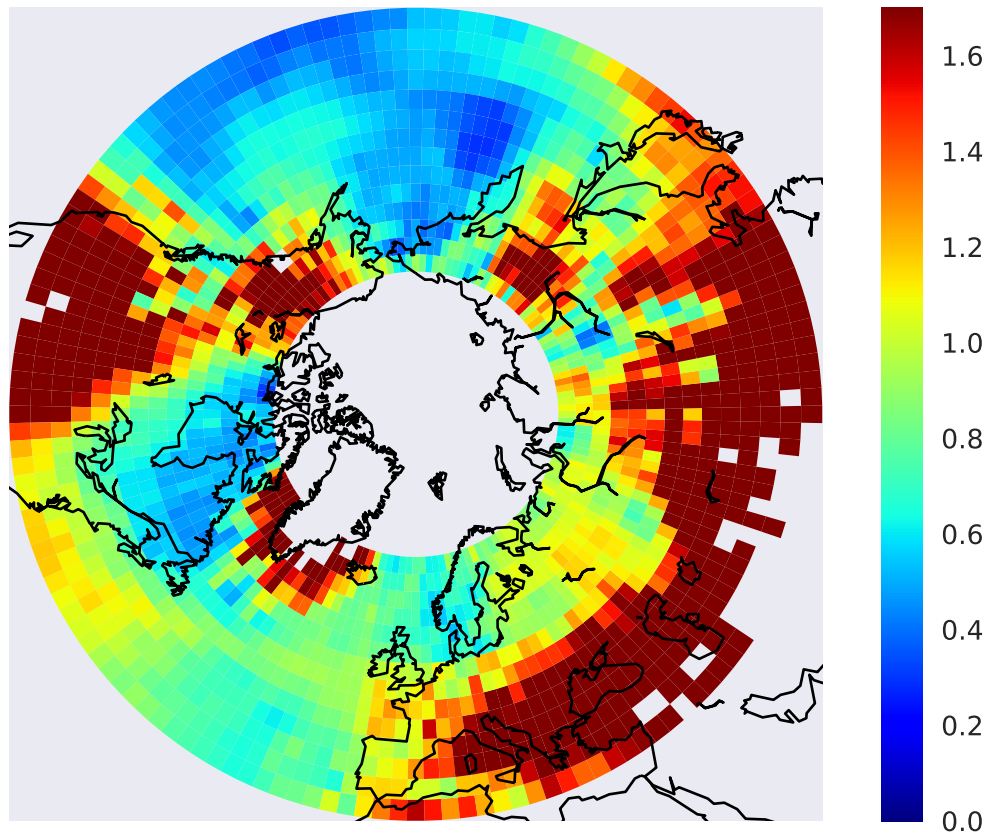

Supplement: Supplementary file 18 [file gmd-15-1375-2022-supplement.zip › supplementary_material/figs-refjra55/maps/mae/MAE_ipsl_cm5a_mr_r1i1p1_wrt_jra55_nh_1979-2005.pdf]

MAE, cmcc\_cm2\_sr5, rli1p1f1 w.r.t. jra55, 1979-2005, all seasons

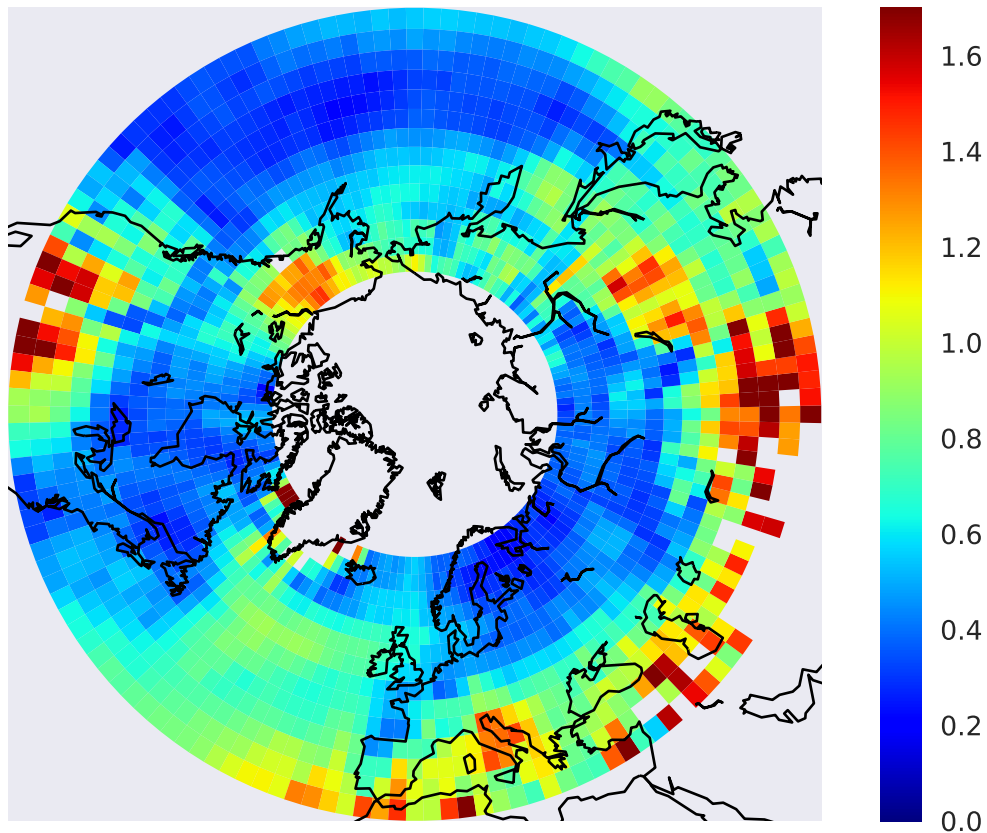

Supplement: Supplementary file 18 [file gmd-15-1375-2022-supplement.zip › supplementary_material/figs-refjra55/maps/mae/MAE_cmcc_cm2_sr5_r1i1p1f1_wrt_jra55_nh_1979-2005.pdf]
