# Supplementary figures and images for: A circulation-based performance atlas of the CMIP5 and 6 models for regional climate studies in the Northern Hemisphere mid-to-high latitudes (part 2 of 2)
Source: Copernicus journal article supplement (doi:10.5194/gmd-15-1375-2022), 2022-02-17

MAE, cmcc\_cm, rli1p1 w.r.t. jra55, 1979-2005, all seasons

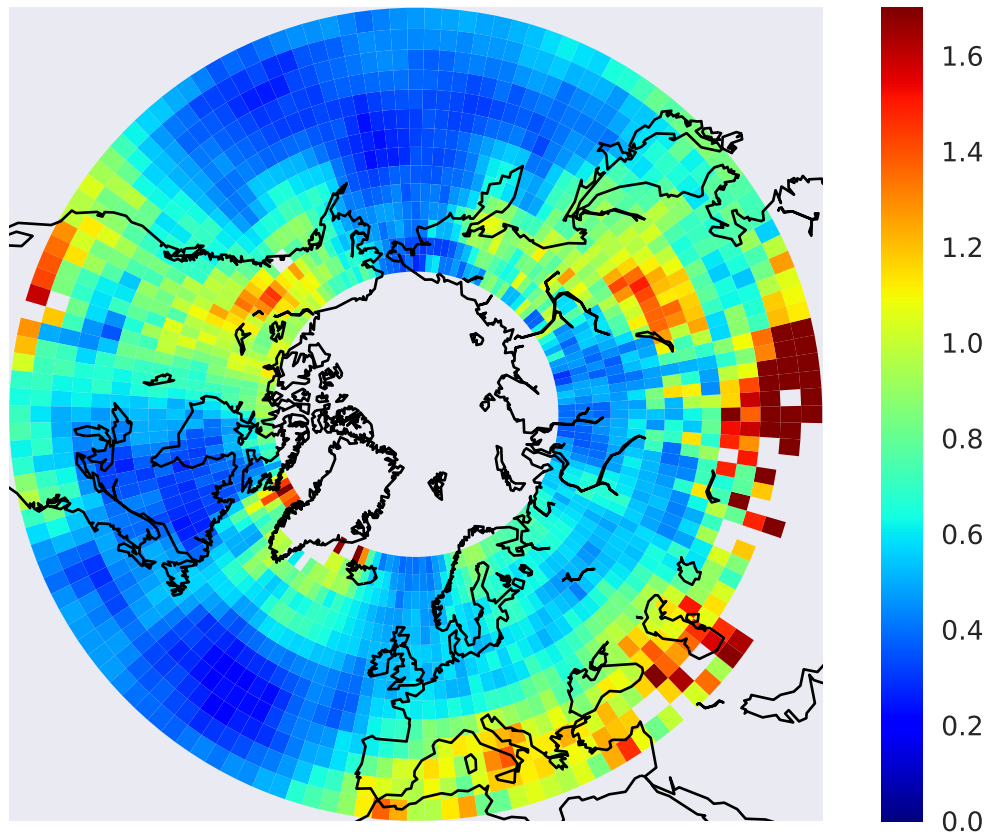

Supplement: Supplementary file 18 [file gmd-15-1375-2022-supplement.zip › supplementary_material/figs-refjra55/maps/mae/MAE_cmcc_cm_r1i1p1_wrt_jra55_nh_1979-2005.pdf]

MAE, noresm2\_lm, r1i1p1f1 w.r.t. jra55, 1979-2005, all seasons

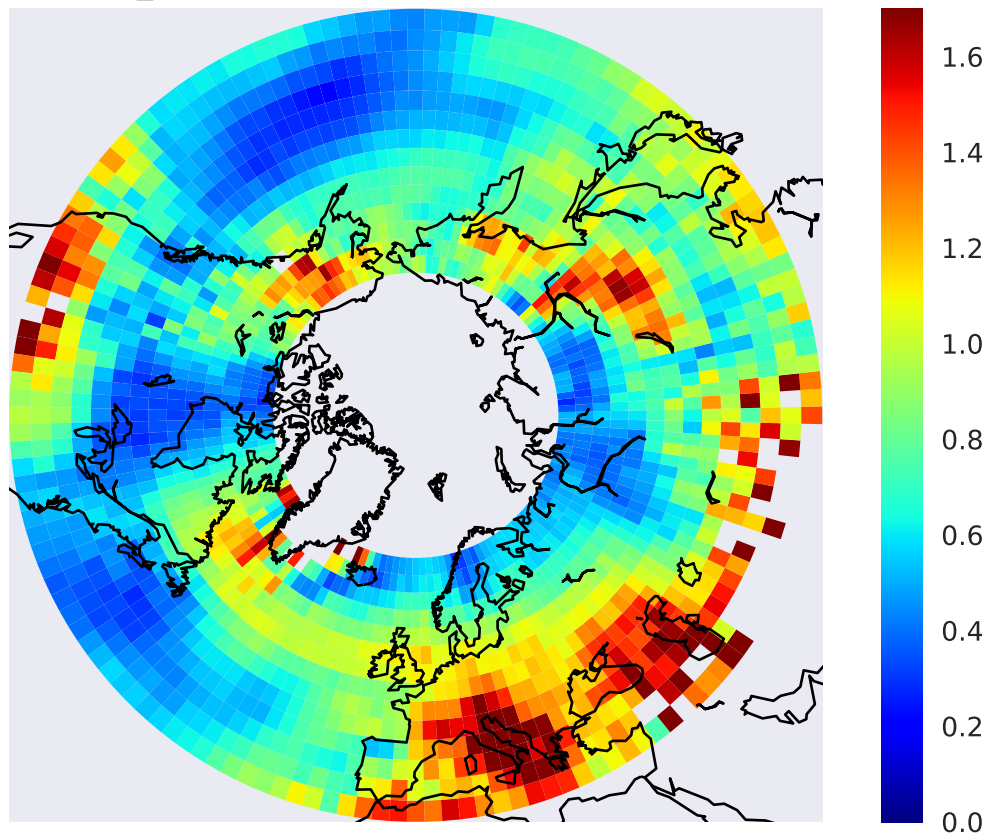

Supplement: Supplementary file 18 [file gmd-15-1375-2022-supplement.zip › supplementary_material/figs-refjra55/maps/mae/MAE_noresm2_lm_r1i1p1f1_wrt_jra55_nh_1979-2005.pdf]

MAE, mpi\_esm\_1\_2\_ham, rli1p1f1 w.r.t. jra55, 1979-2005, all seasons

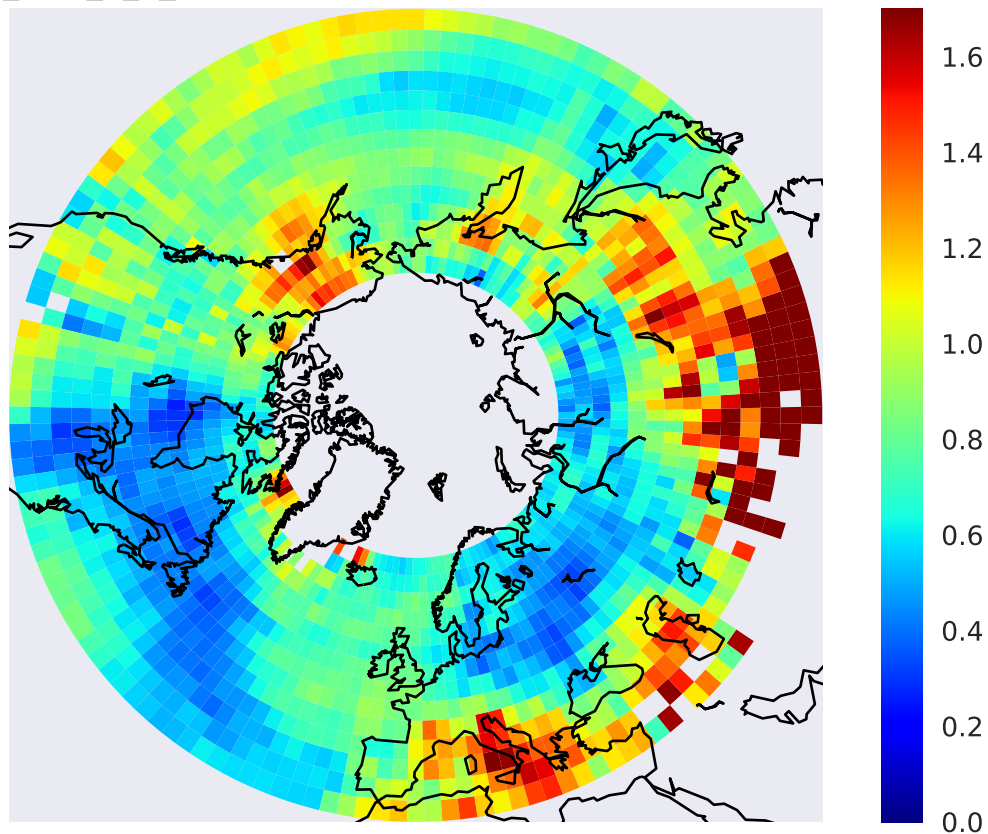

Supplement: Supplementary file 18 [file gmd-15-1375-2022-supplement.zip › supplementary_material/figs-refjra55/maps/mae/MAE_mpi_esm_1_2_ham_r1i1p1f1_wrt_jra55_nh_1979-2005.pdf]

MAE, iitm\_esm, rli1p1f1 w.r.t. jra55, 1979-2005, all seasons

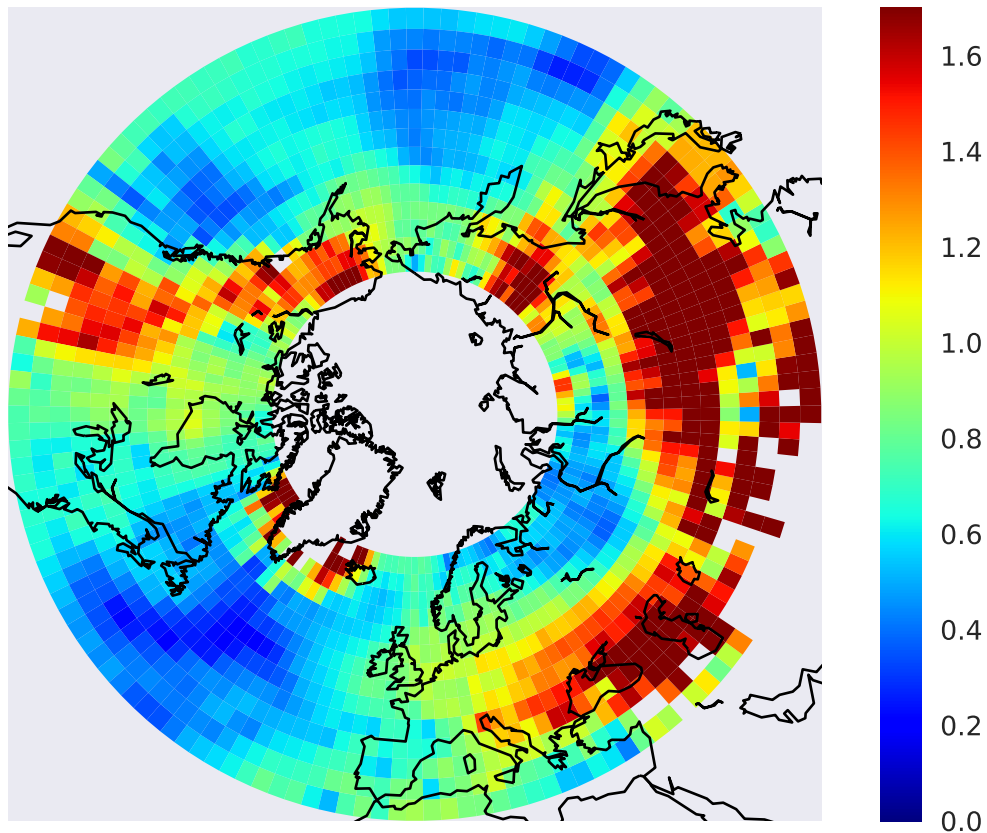

Supplement: Supplementary file 18 [file gmd-15-1375-2022-supplement.zip › supplementary_material/figs-refjra55/maps/mae/MAE_iitm_esm_r1i1p1f1_wrt_jra55_nh_1979-2005.pdf]

MAE, access\_esm1\_5, r1i1p1f1 w.r.t. jra55, 1979-2005, all seasons

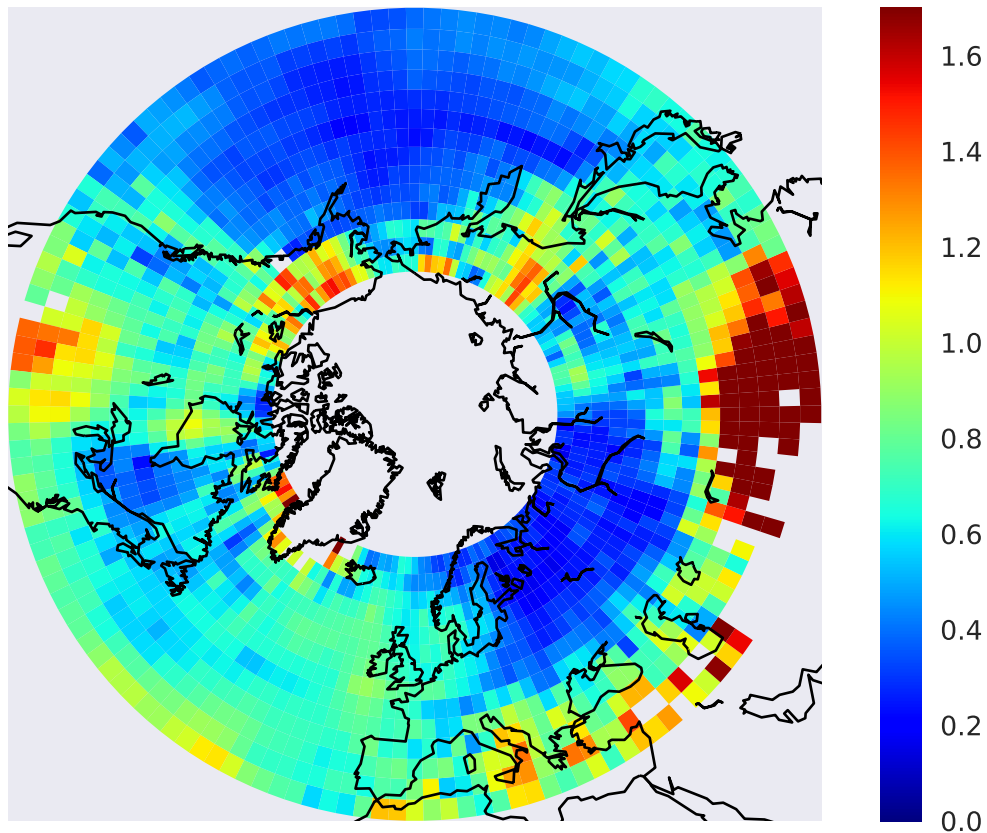

Supplement: Supplementary file 18 [file gmd-15-1375-2022-supplement.zip › supplementary_material/figs-refjra55/maps/mae/MAE_access_esm1_5_r1i1p1f1_wrt_jra55_nh_1979-2005.pdf]

MAE, hadgem3\_gc31\_mm, rli1p1f3 w.r.t. jra55, 1979-2005, all seasons

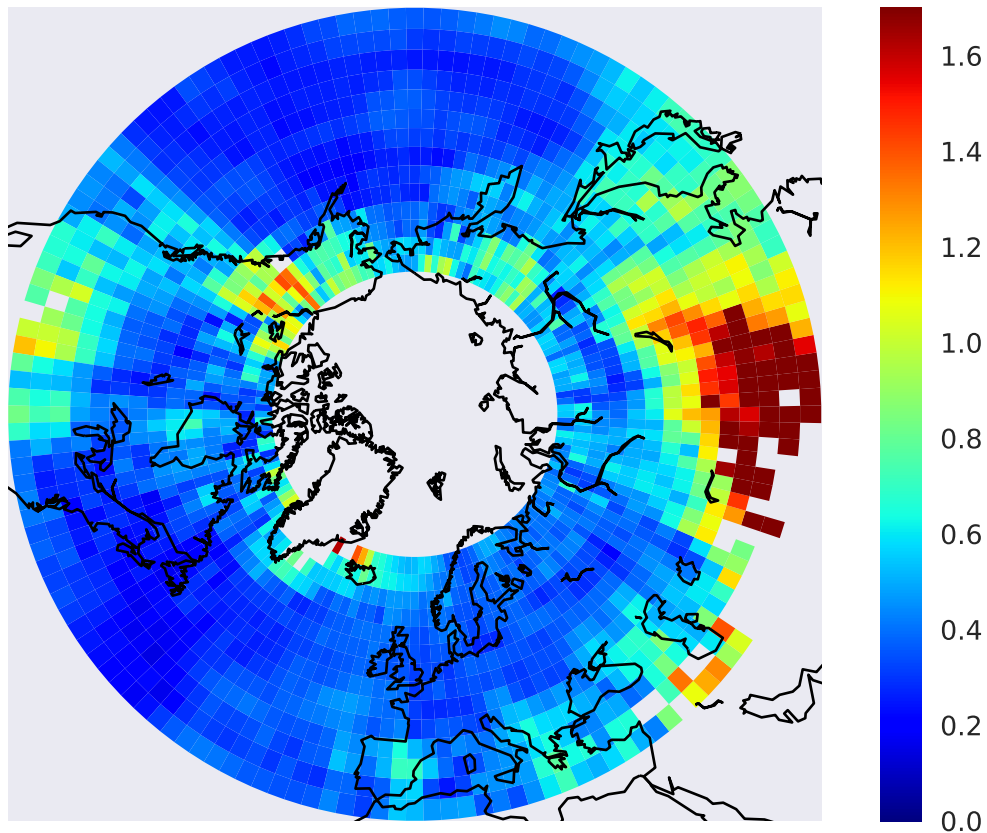

Supplement: Supplementary file 18 [file gmd-15-1375-2022-supplement.zip › supplementary_material/figs-refjra55/maps/mae/MAE_hadgem3_gc31_mm_r1i1p1f3_wrt_jra55_nh_1979-2005.pdf]

MAE, sam0\_unicon, r1i1p1f1 w.r.t. jra55, 1979-2005, all seasons

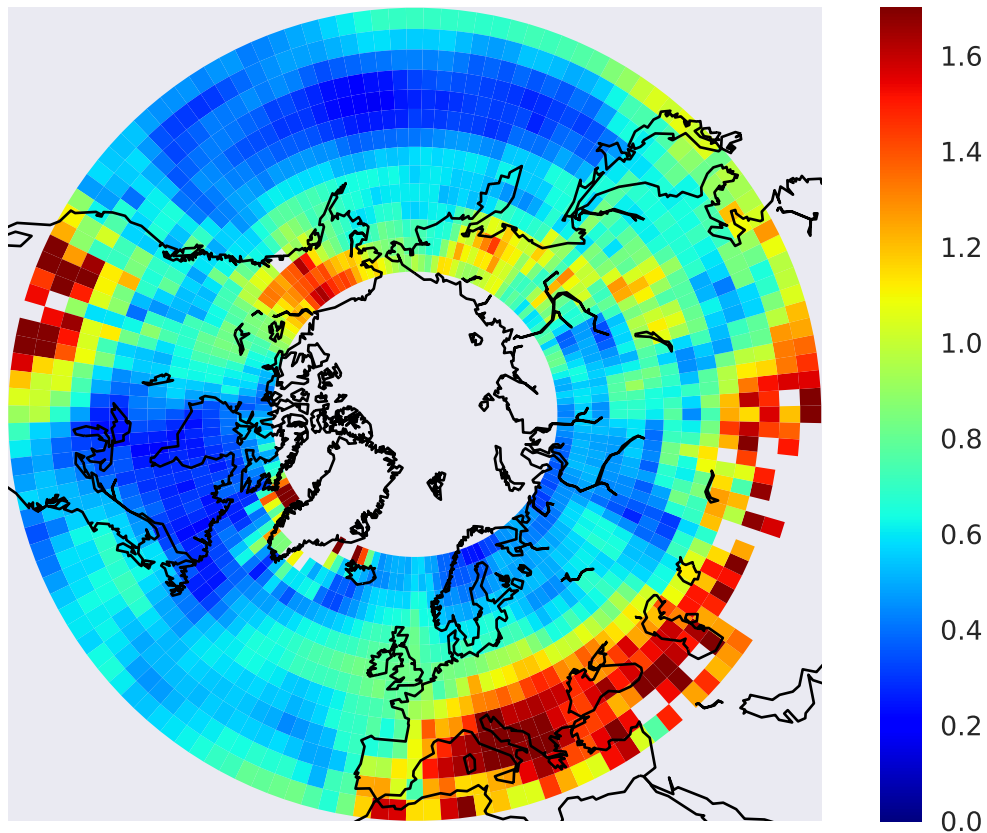

Supplement: Supplementary file 18 [file gmd-15-1375-2022-supplement.zip › supplementary_material/figs-refjra55/maps/mae/MAE_sam0_unicon_r1i1p1f1_wrt_jra55_nh_1979-2005.pdf]

MAE, cnrm\_cm5, r1i1p1 w.r.t. jra55, 1979-2005, all seasons

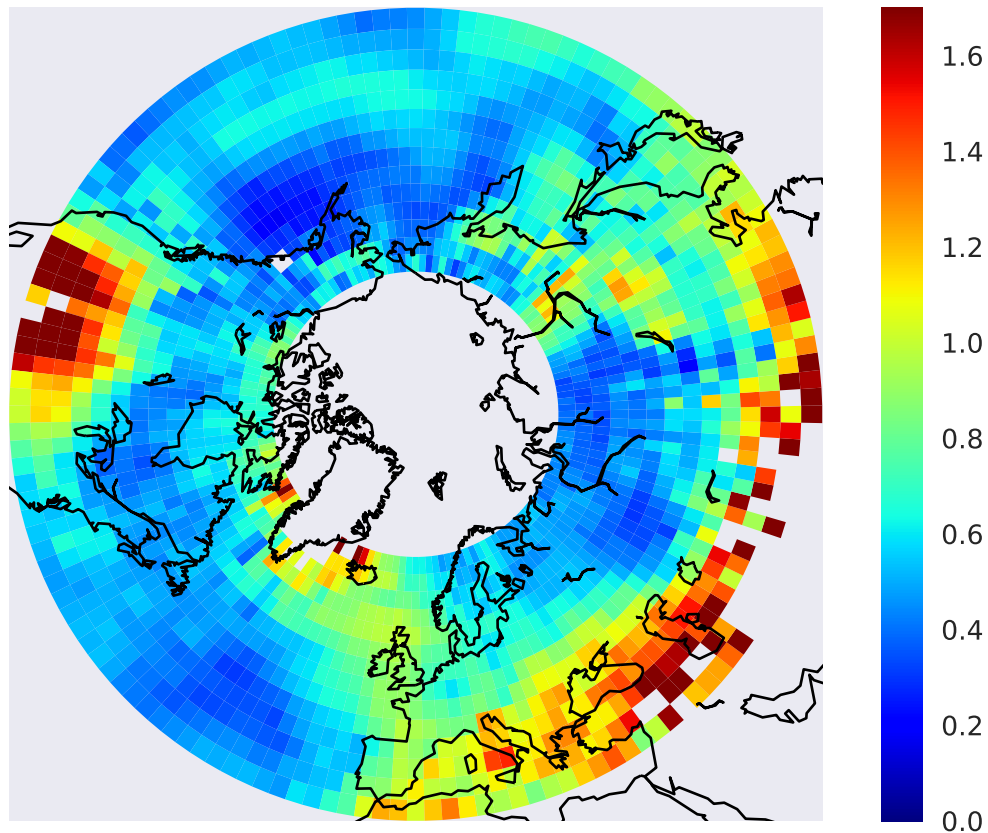

Supplement: Supplementary file 18 [file gmd-15-1375-2022-supplement.zip › supplementary_material/figs-refjra55/maps/mae/MAE_cnrm_cm5_r1i1p1_wrt_jra55_nh_1979-2005.pdf]

MAE, ec\_earth3\_aerchem, r1i1p1f1 w.r.t. jra55, 1979-2005, all seasons

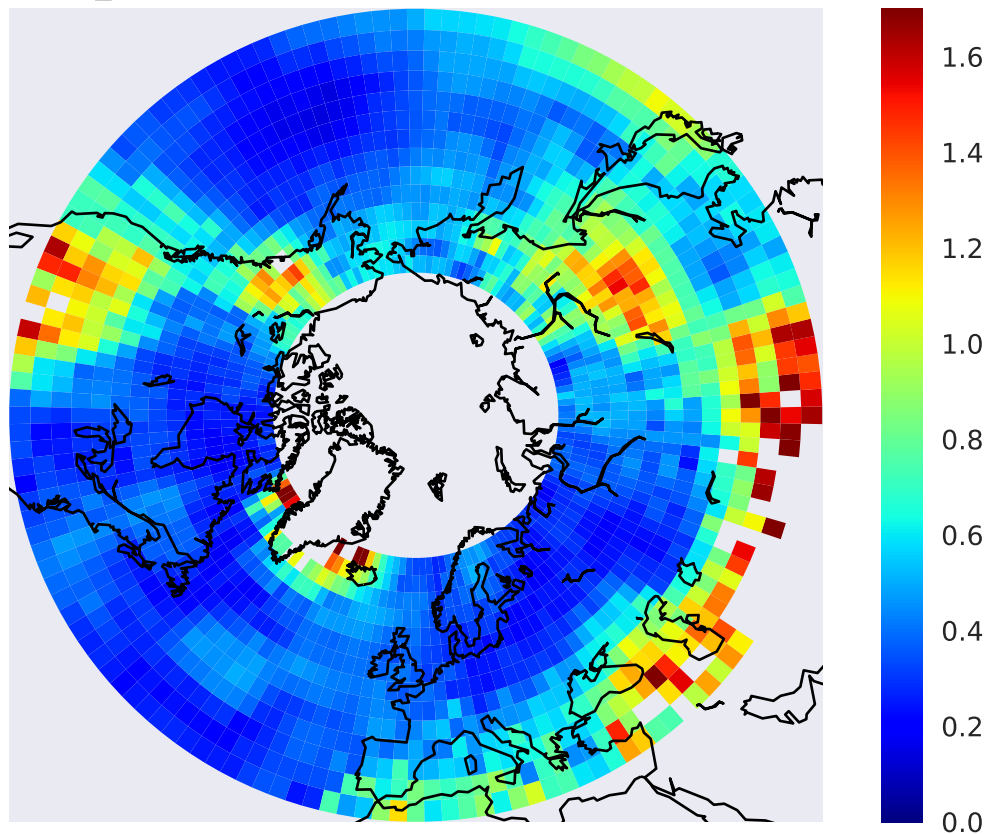

Supplement: Supplementary file 18 [file gmd-15-1375-2022-supplement.zip › supplementary_material/figs-refjra55/maps/mae/MAE_ec_earth3_aerchem_r1i1p1f1_wrt_jra55_nh_1979-2005.pdf]

MAE, hadgem2\_es, rli1p1 w.r.t. jra55, 1979-2005, all seasons

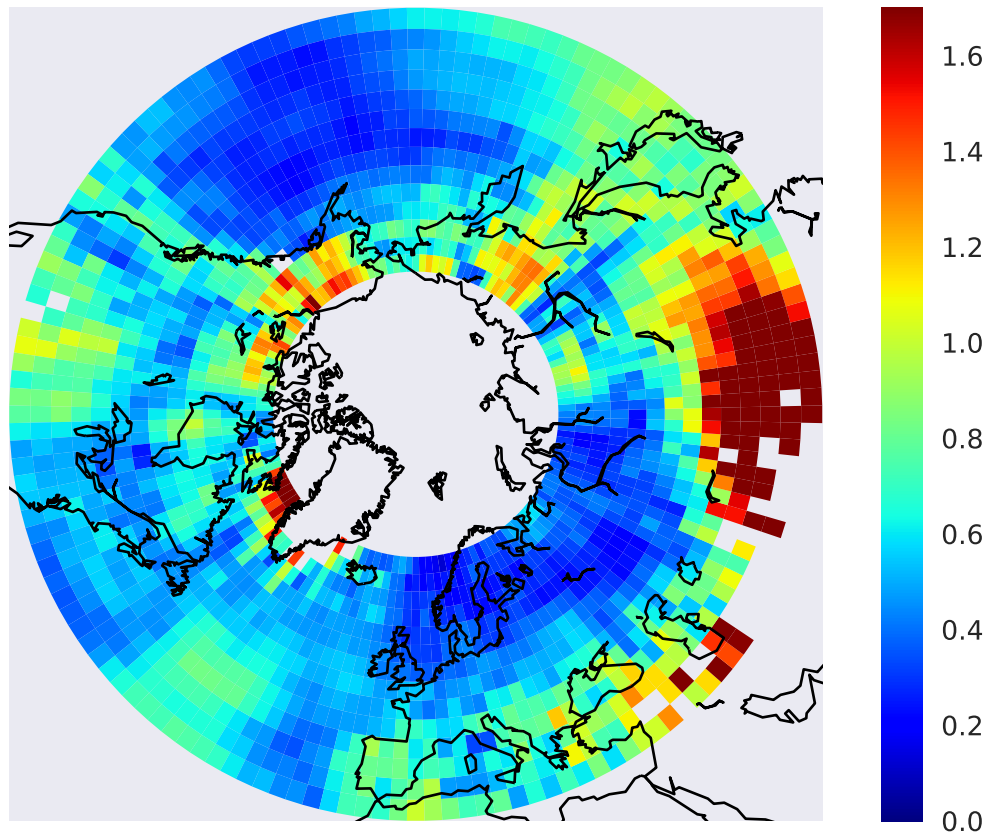

Supplement: Supplementary file 18 [file gmd-15-1375-2022-supplement.zip › supplementary_material/figs-refjra55/maps/mae/MAE_hadgem2_es_r1i1p1_wrt_jra55_nh_1979-2005.pdf]

MAE, bcc\_csm2\_mr, r1i1p1f1 w.r.t. jra55, 1979-2005, all seasons

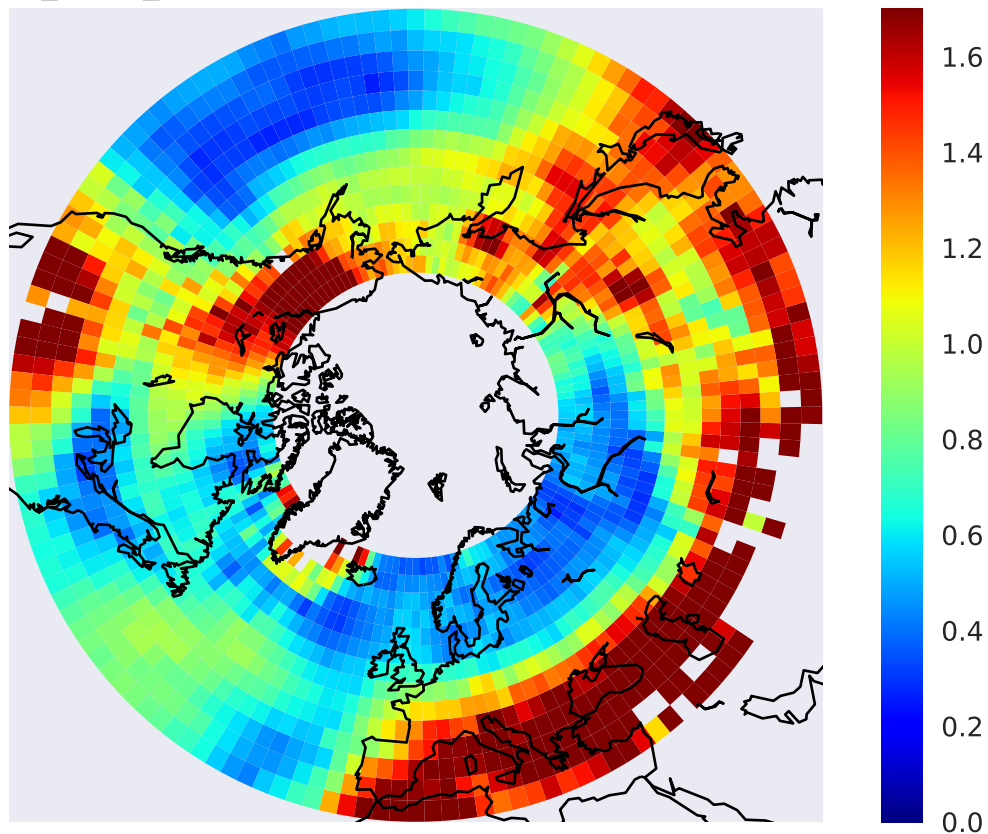

Supplement: Supplementary file 18 [file gmd-15-1375-2022-supplement.zip › supplementary_material/figs-refjra55/maps/mae/MAE_bcc_csm2_mr_r1i1p1f1_wrt_jra55_nh_1979-2005.pdf]

MAE, awi\_esm\_1\_1\_lr, r1i1p1f1 w.r.t. jra55, 1979-2005, all seasons

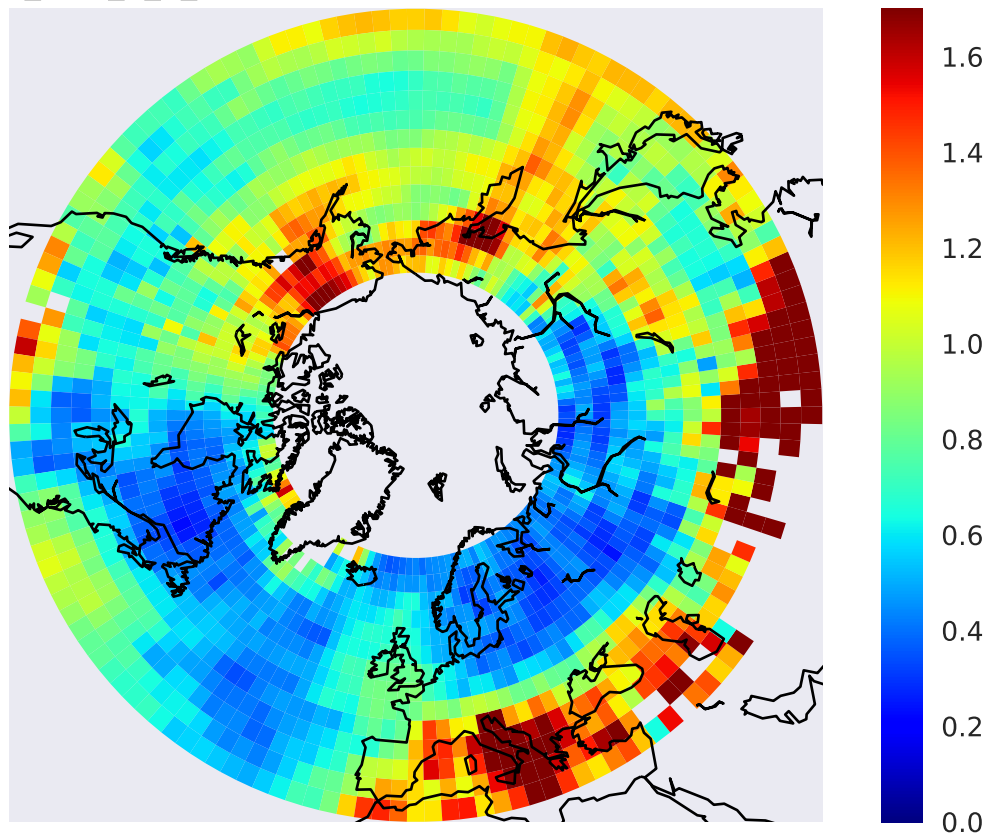

Supplement: Supplementary file 18 [file gmd-15-1375-2022-supplement.zip › supplementary_material/figs-refjra55/maps/mae/MAE_awi_esm_1_1_lr_r1i1p1f1_wrt_jra55_nh_1979-2005.pdf]

MAE, bcc\_csm1\_1, r1i1p1 w.r.t. jra55, 1979-2005, all seasons

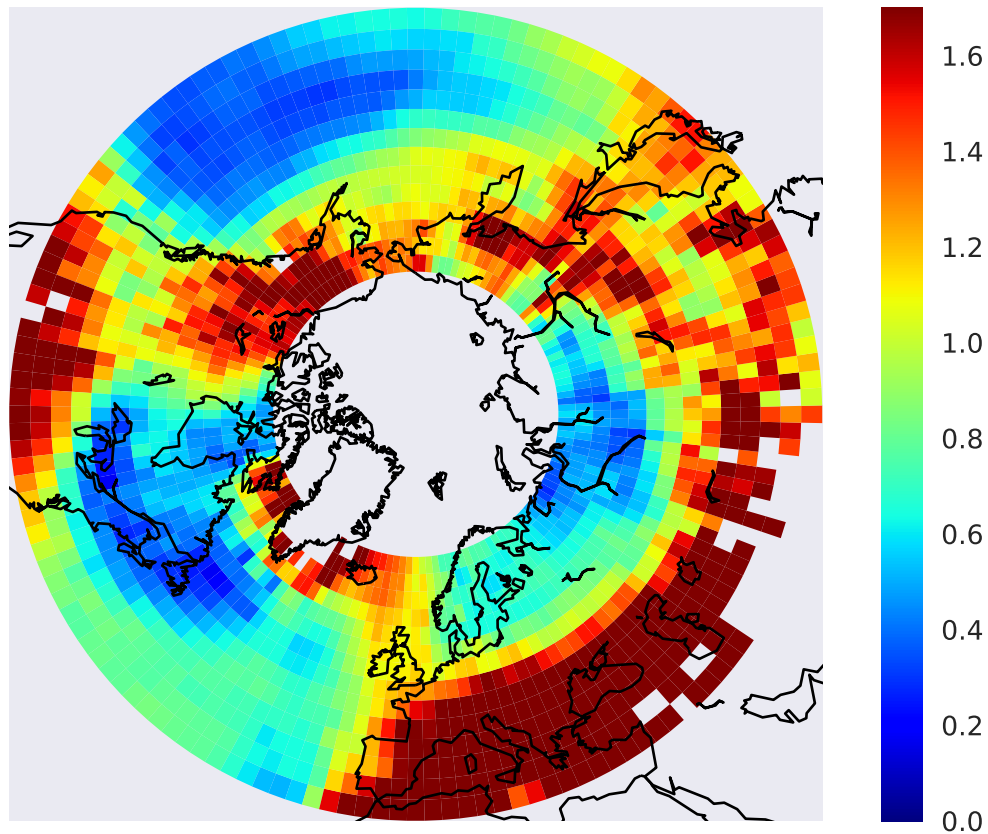

Supplement: Supplementary file 18 [file gmd-15-1375-2022-supplement.zip › supplementary_material/figs-refjra55/maps/mae/MAE_bcc_csm1_1_r1i1p1_wrt_jra55_nh_1979-2005.pdf]

MAE, cmcc\_esm2, r1i1p1f1 w.r.t. jra55, 1979-2005, all seasons

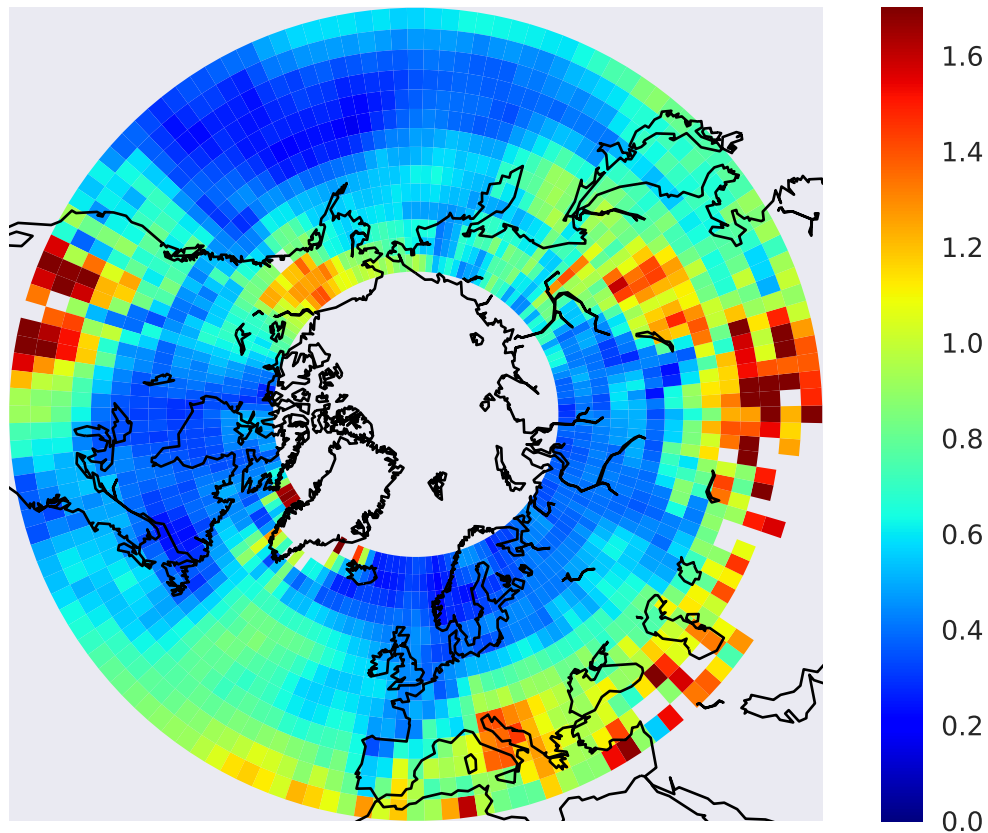

Supplement: Supplementary file 18 [file gmd-15-1375-2022-supplement.zip › supplementary_material/figs-refjra55/maps/mae/MAE_cmcc_esm2_r1i1p1f1_wrt_jra55_nh_1979-2005.pdf]

MAE, ec\_earth3\_cc, rli1p1f1 w.r.t. jra55, 1979-2005, all seasons

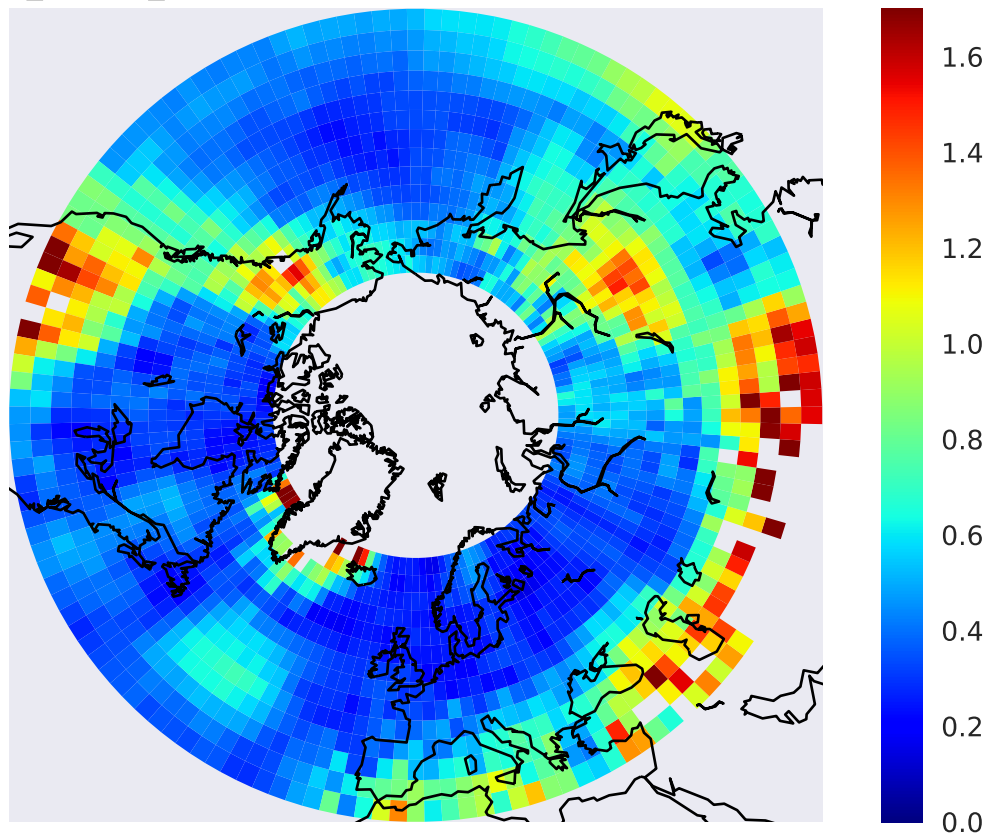

Supplement: Supplementary file 18 [file gmd-15-1375-2022-supplement.zip › supplementary_material/figs-refjra55/maps/mae/MAE_ec_earth3_cc_r1i1p1f1_wrt_jra55_nh_1979-2005.pdf]

MAE, csiro\_mk3\_6\_0, r1i1p1 w.r.t. jra55, 1979-2005, all seasons

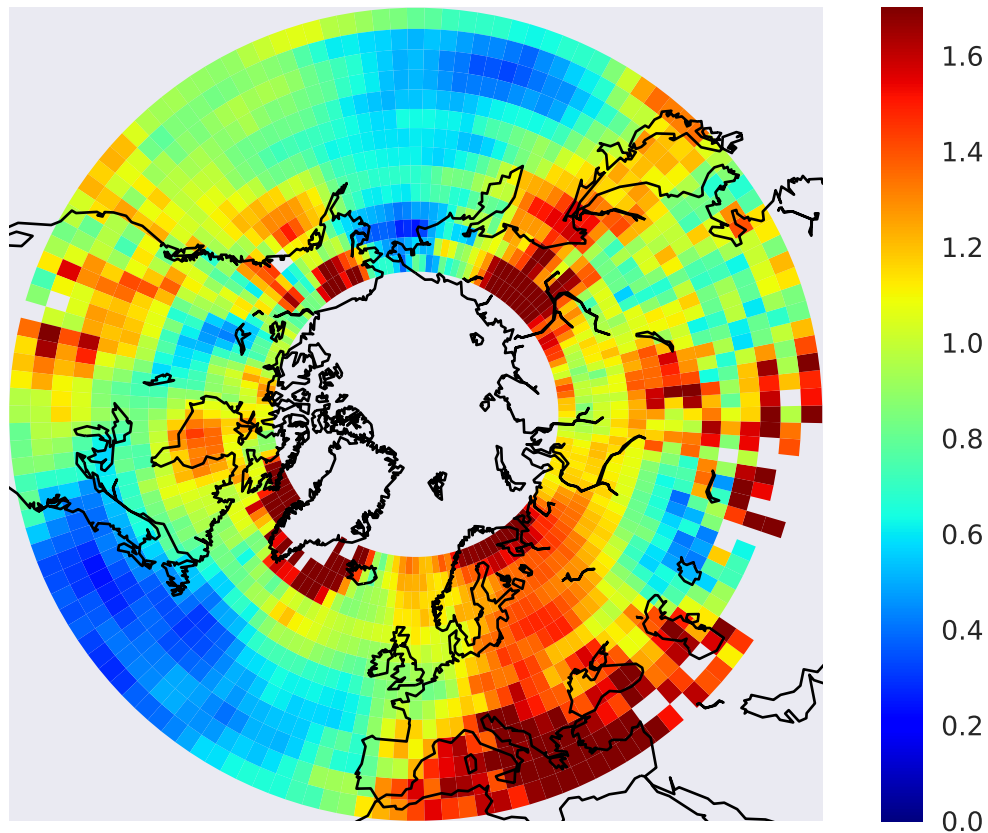

Supplement: Supplementary file 18 [file gmd-15-1375-2022-supplement.zip › supplementary_material/figs-refjra55/maps/mae/MAE_csiro_mk3_6_0_r1i1p1_wrt_jra55_nh_1979-2005.pdf]

MAE, gfdl\_cm3, rli1p1 w.r.t. jra55, 1979-2005, all seasons

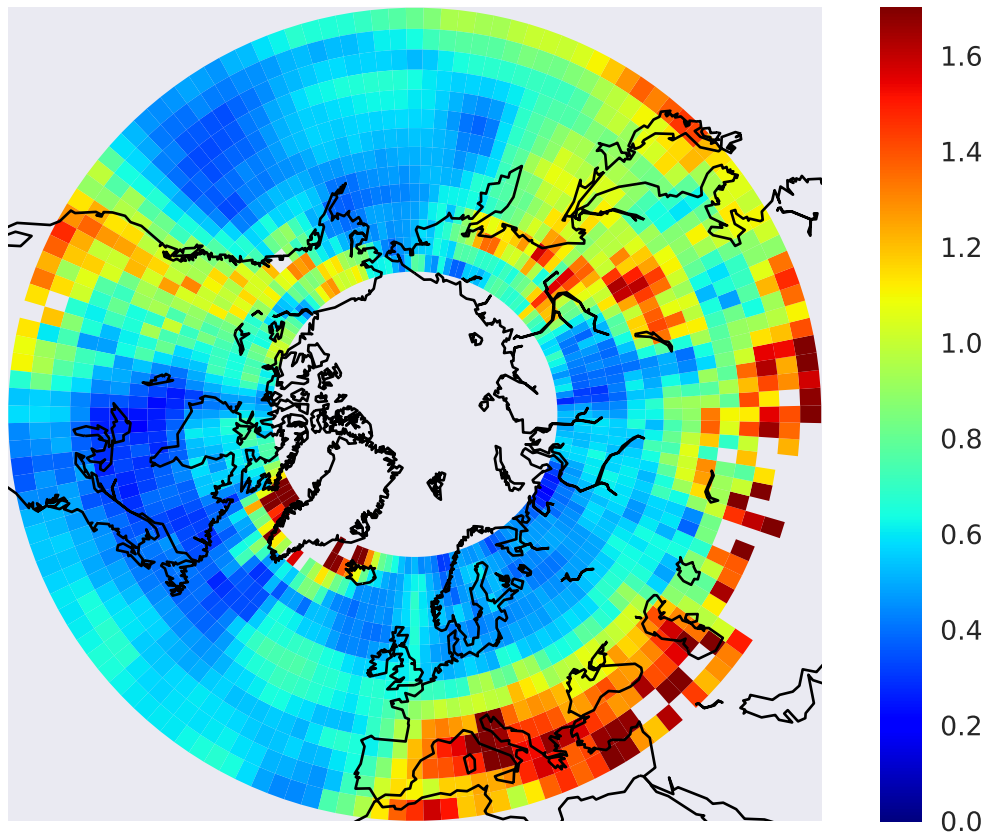

Supplement: Supplementary file 18 [file gmd-15-1375-2022-supplement.zip › supplementary_material/figs-refjra55/maps/mae/MAE_gfdl_cm3_r1i1p1_wrt_jra55_nh_1979-2005.pdf]

MAE, access13, r1i1p1 w.r.t. jra55, 1979-2005, all seasons

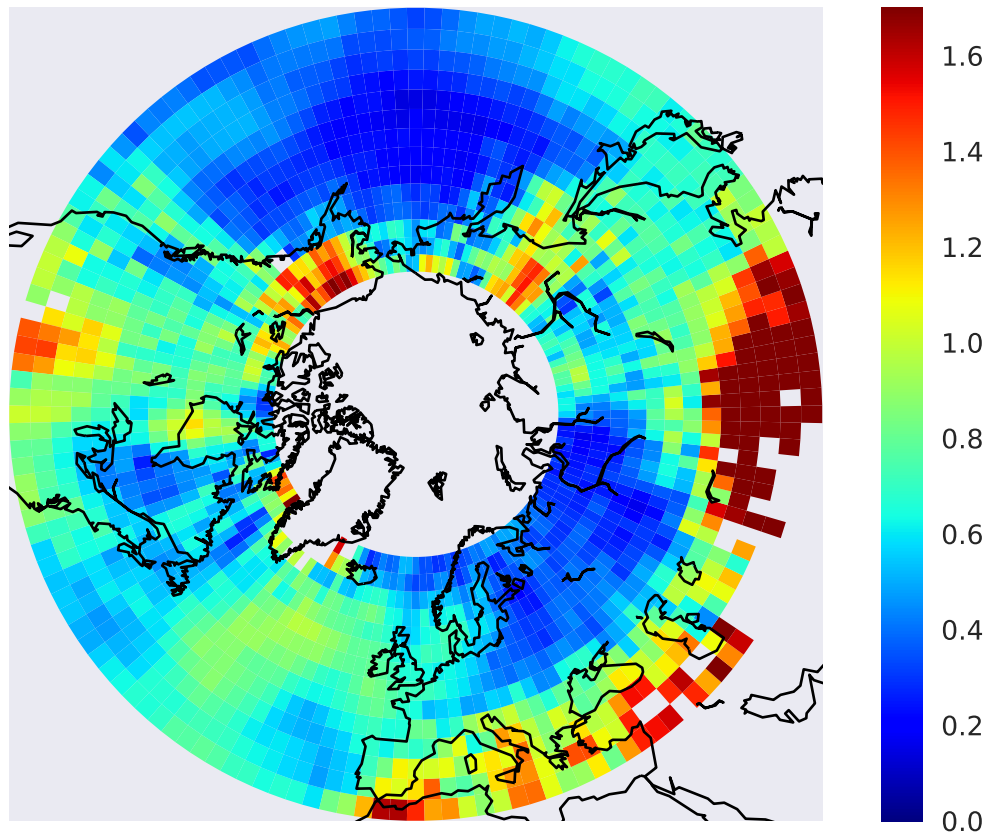

Supplement: Supplementary file 18 [file gmd-15-1375-2022-supplement.zip › supplementary_material/figs-refjra55/maps/mae/MAE_access13_r1i1p1_wrt_jra55_nh_1979-2005.pdf]

MAE, ec\_earth3\_veg, rli1p1f1 w.r.t. jra55, 1979-2005, all seasons

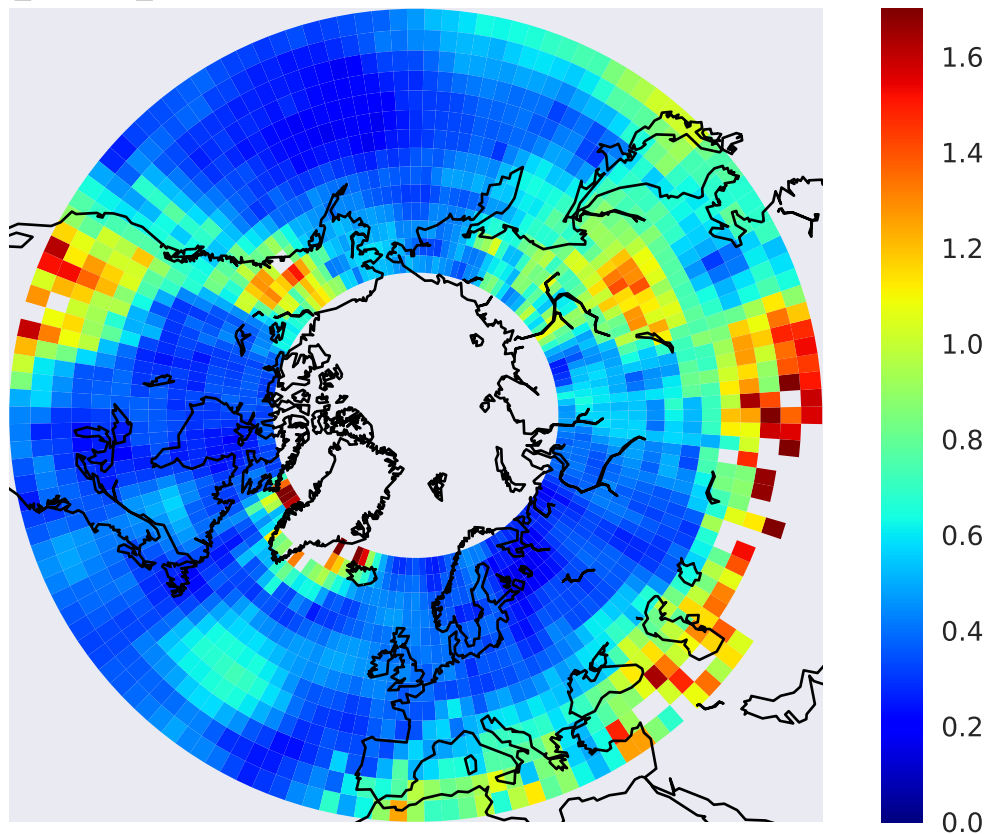

Supplement: Supplementary file 18 [file gmd-15-1375-2022-supplement.zip › supplementary_material/figs-refjra55/maps/mae/MAE_ec_earth3_veg_r1i1p1f1_wrt_jra55_nh_1979-2005.pdf]

MAE, cnrm\_esm2\_1, r1i1p1f2 w.r.t. jra55, 1979-2005, all seasons

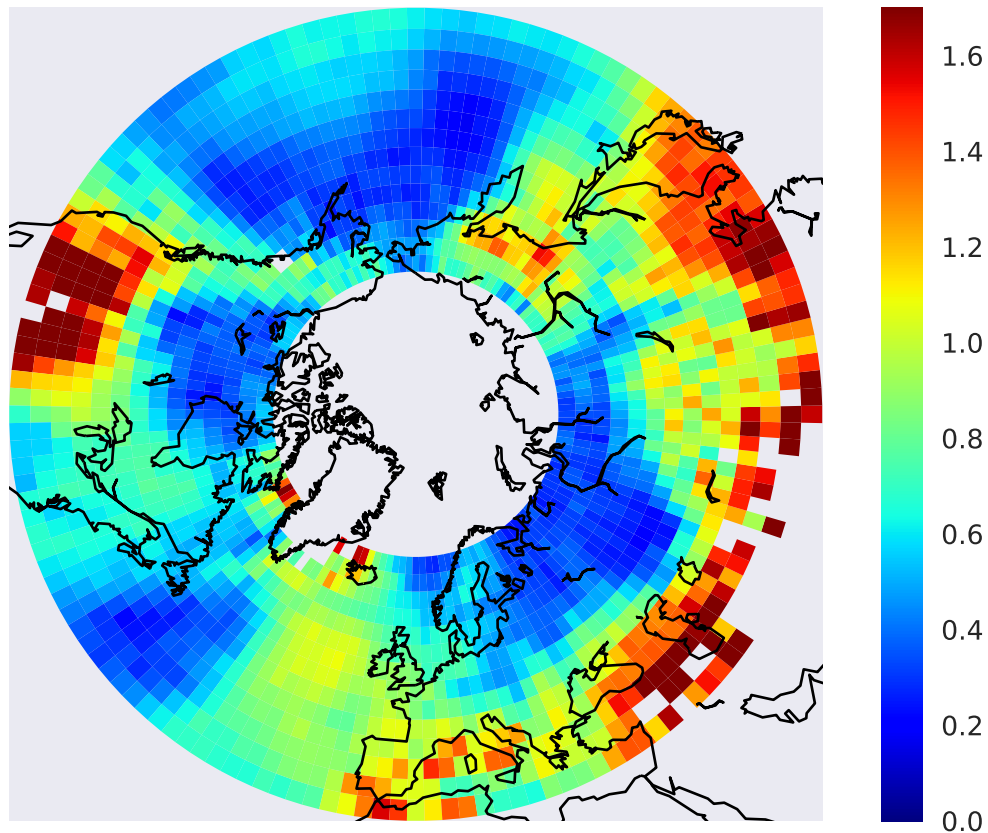

Supplement: Supplementary file 18 [file gmd-15-1375-2022-supplement.zip › supplementary_material/figs-refjra55/maps/mae/MAE_cnrm_esm2_1_r1i1p1f2_wrt_jra55_nh_1979-2005.pdf]

MAE, ccsm4, r6i1p1 w.r.t. jra55, 1979-2005, all seasons

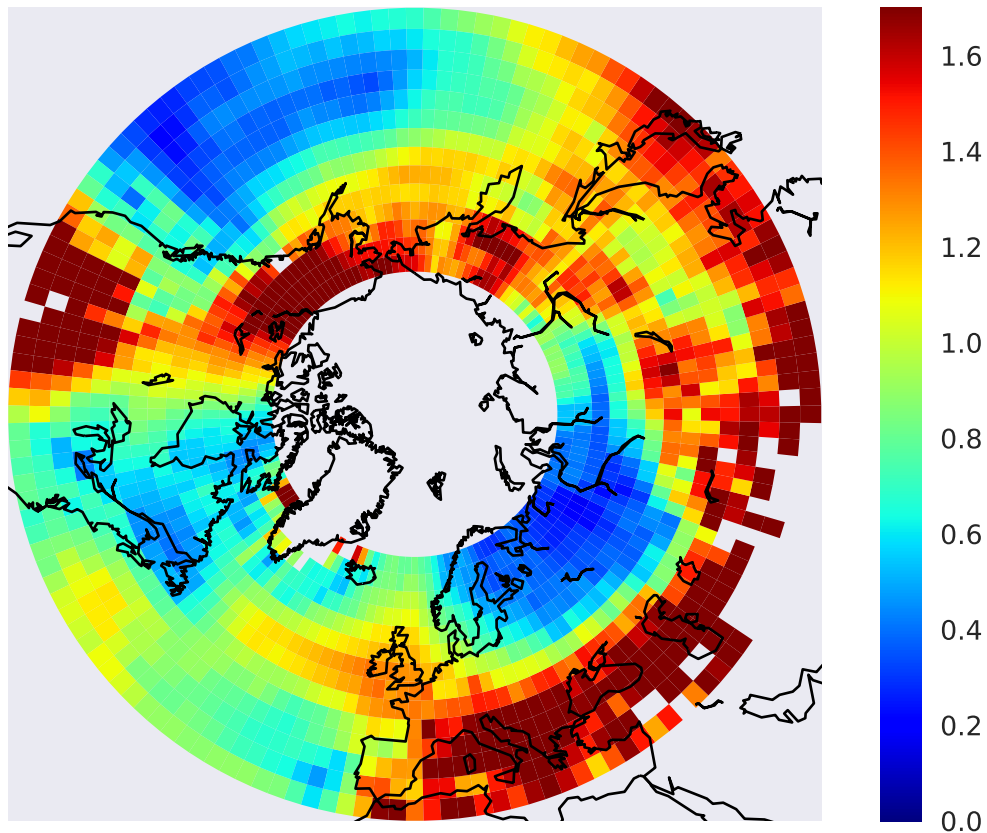

Supplement: Supplementary file 18 [file gmd-15-1375-2022-supplement.zip › supplementary_material/figs-refjra55/maps/mae/MAE_ccsm4_r6i1p1_wrt_jra55_nh_1979-2005.pdf]

MAE, access\_cm2, r1i1p1f1 w.r.t. jra55, 1979-2005, all seasons

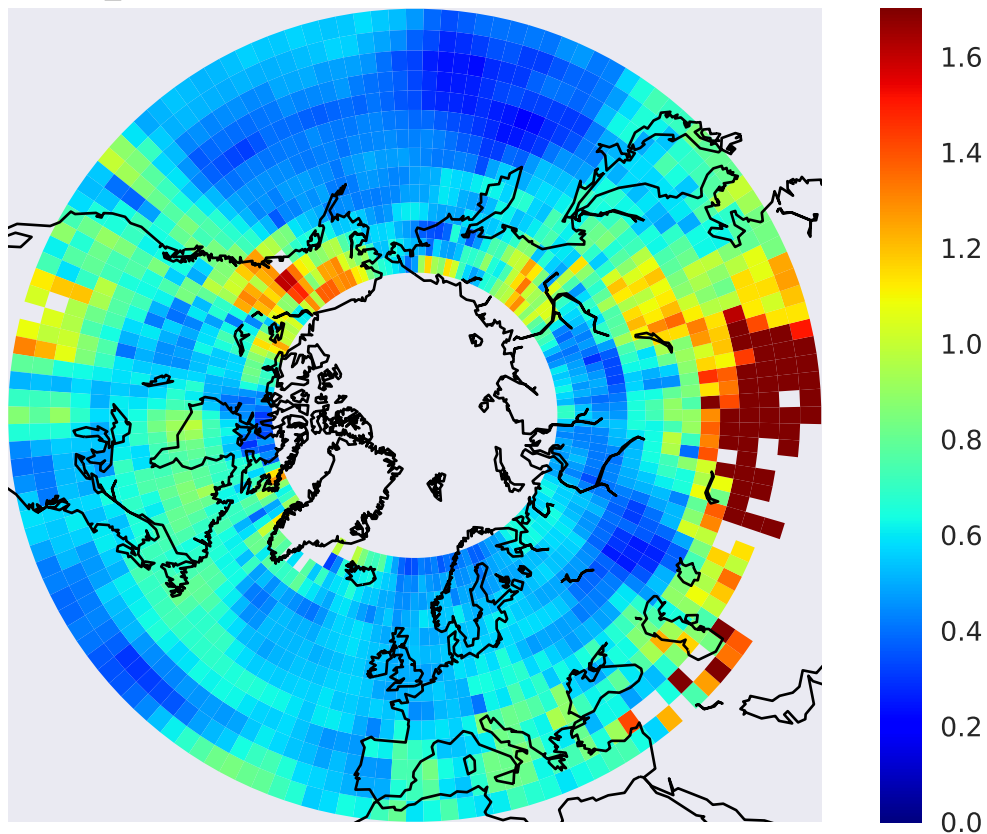

Supplement: Supplementary file 18 [file gmd-15-1375-2022-supplement.zip › supplementary_material/figs-refjra55/maps/mae/MAE_access_cm2_r1i1p1f1_wrt_jra55_nh_1979-2005.pdf]

MAE, mpi\_esm\_1\_2\_lr, r1i1p1f1 w.r.t. jra55, 1979-2005, all seasons

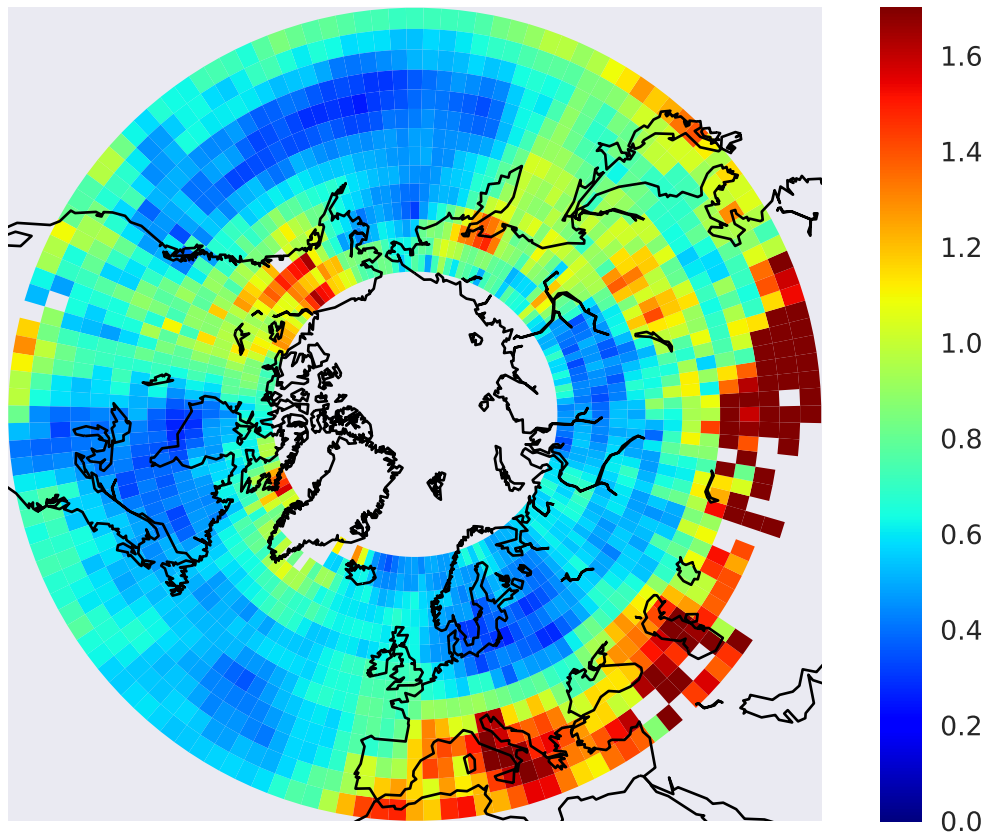

Supplement: Supplementary file 18 [file gmd-15-1375-2022-supplement.zip › supplementary_material/figs-refjra55/maps/mae/MAE_mpi_esm_1_2_lr_r1i1p1f1_wrt_jra55_nh_1979-2005.pdf]

MAE, kiost\_esm, r1i1p1f1 w.r.t. jra55, 1979-2005, all seasons

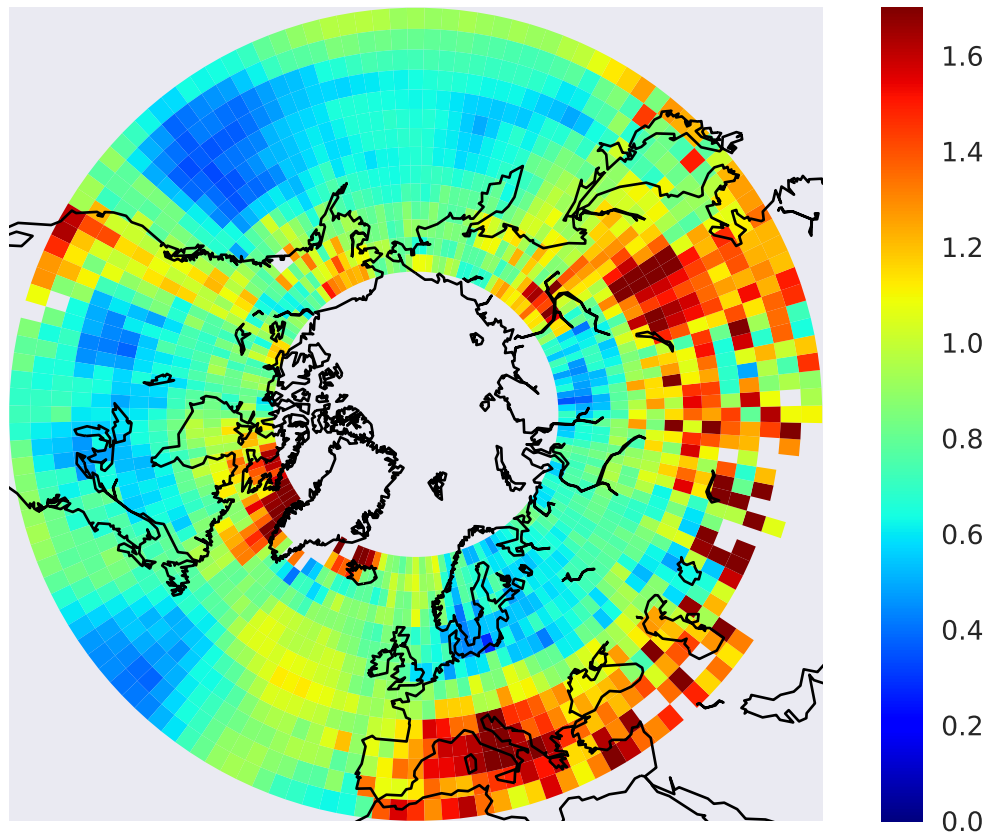

Supplement: Supplementary file 18 [file gmd-15-1375-2022-supplement.zip › supplementary_material/figs-refjra55/maps/mae/MAE_kiost_esm_r1i1p1f1_wrt_jra55_nh_1979-2005.pdf]

MAE, mri\_esm2\_0, r1i1p1f1 w.r.t. jra55, 1979-2005, all seasons

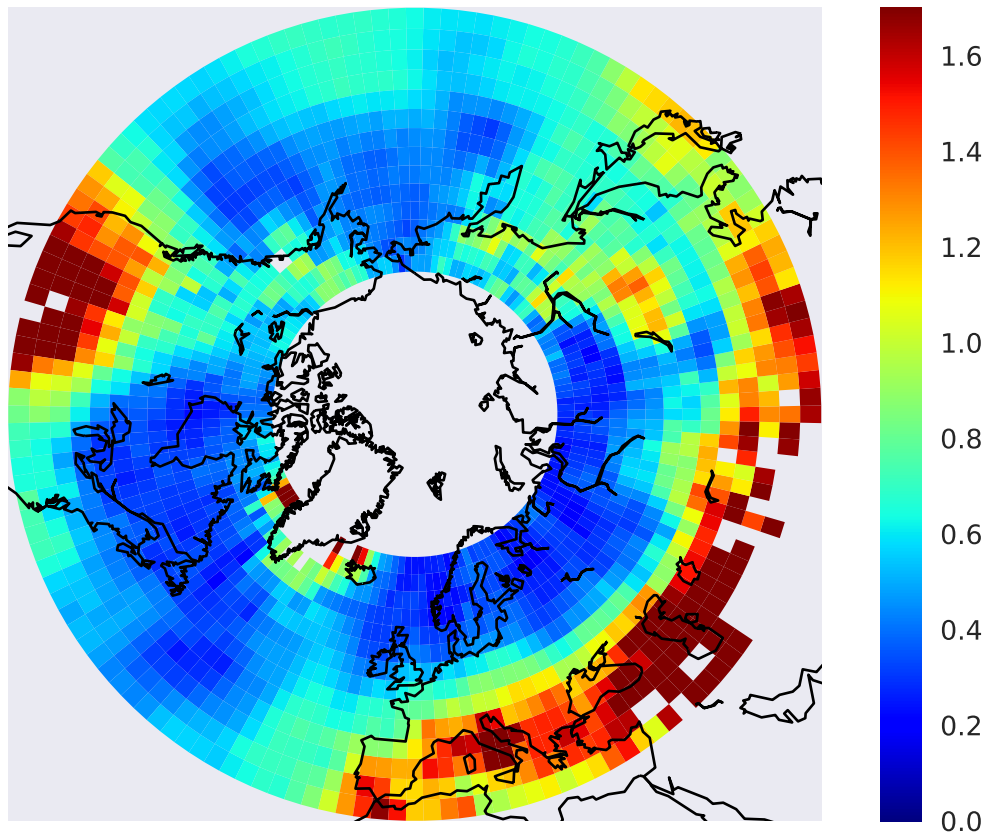

Supplement: Supplementary file 18 [file gmd-15-1375-2022-supplement.zip › supplementary_material/figs-refjra55/maps/mae/MAE_mri_esm2_0_r1i1p1f1_wrt_jra55_nh_1979-2005.pdf]

MAE, access10, r1i1p1 w.r.t. jra55, 1979-2005, all seasons

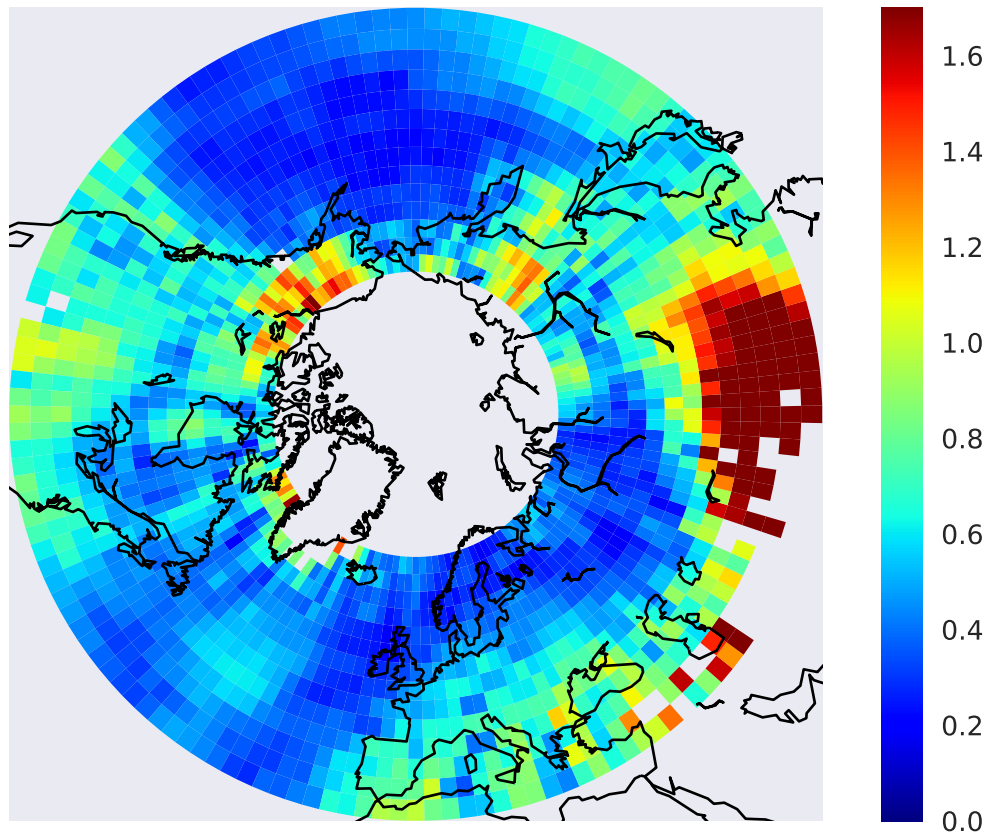

Supplement: Supplementary file 18 [file gmd-15-1375-2022-supplement.zip › supplementary_material/figs-refjra55/maps/mae/MAE_access10_r1i1p1_wrt_jra55_nh_1979-2005.pdf]

MAE, nesm3, rli1p1f1 w.r.t. jra55, 1979-2005, all seasons

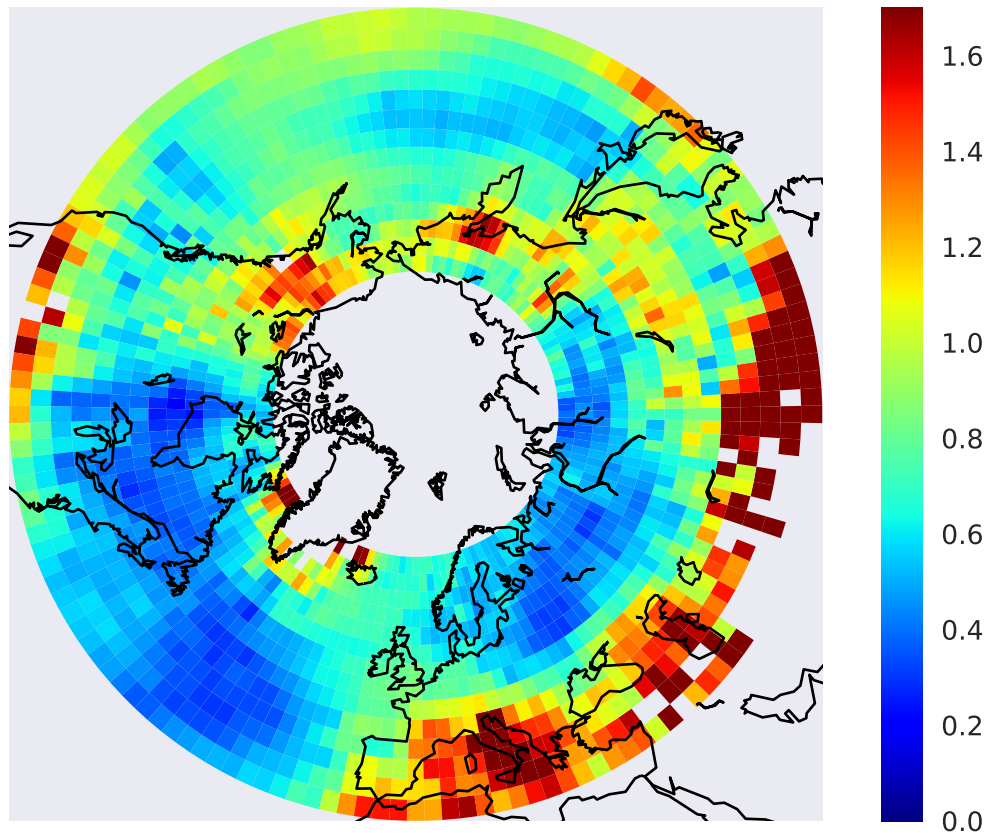

Supplement: Supplementary file 18 [file gmd-15-1375-2022-supplement.zip › supplementary_material/figs-refjra55/maps/mae/MAE_nesm3_r1i1p1f1_wrt_jra55_nh_1979-2005.pdf]

MAE, inm\_cm4, rli1p1 w.r.t. jra55, 1979-2005, all seasons

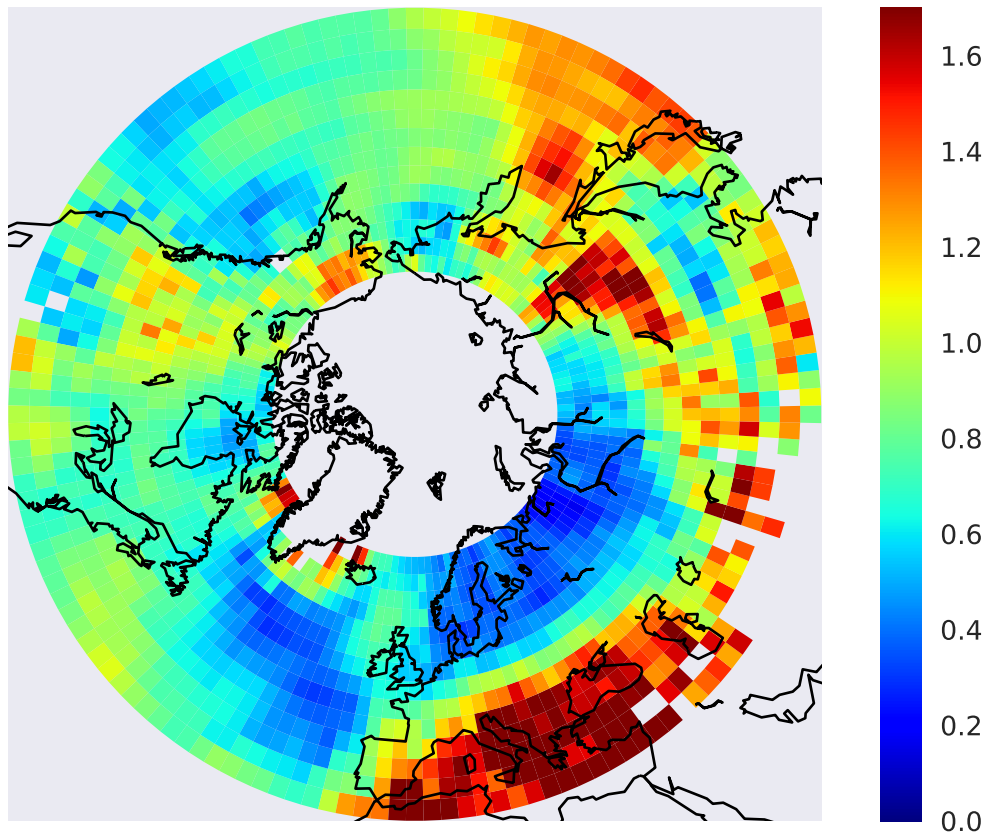

Supplement: Supplementary file 18 [file gmd-15-1375-2022-supplement.zip › supplementary_material/figs-refjra55/maps/mae/MAE_inm_cm4_r1i1p1_wrt_jra55_nh_1979-2005.pdf]

MAE, canesm2, rli1p1 w.r.t. jra55, 1979-2005, all seasons

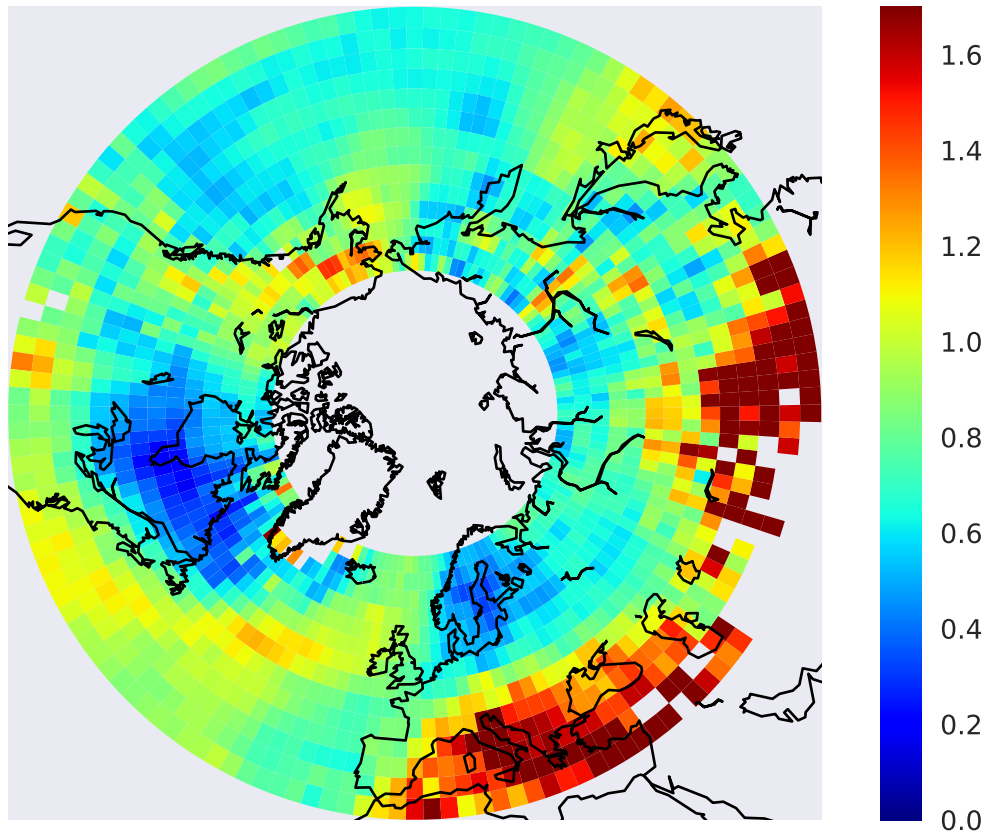

Supplement: Supplementary file 18 [file gmd-15-1375-2022-supplement.zip › supplementary_material/figs-refjra55/maps/mae/MAE_canesm2_r1i1p1_wrt_jra55_nh_1979-2005.pdf]

MAE, giss\_e2\_h, r6i1p1 w.r.t. jra55, 1979-2005, all seasons

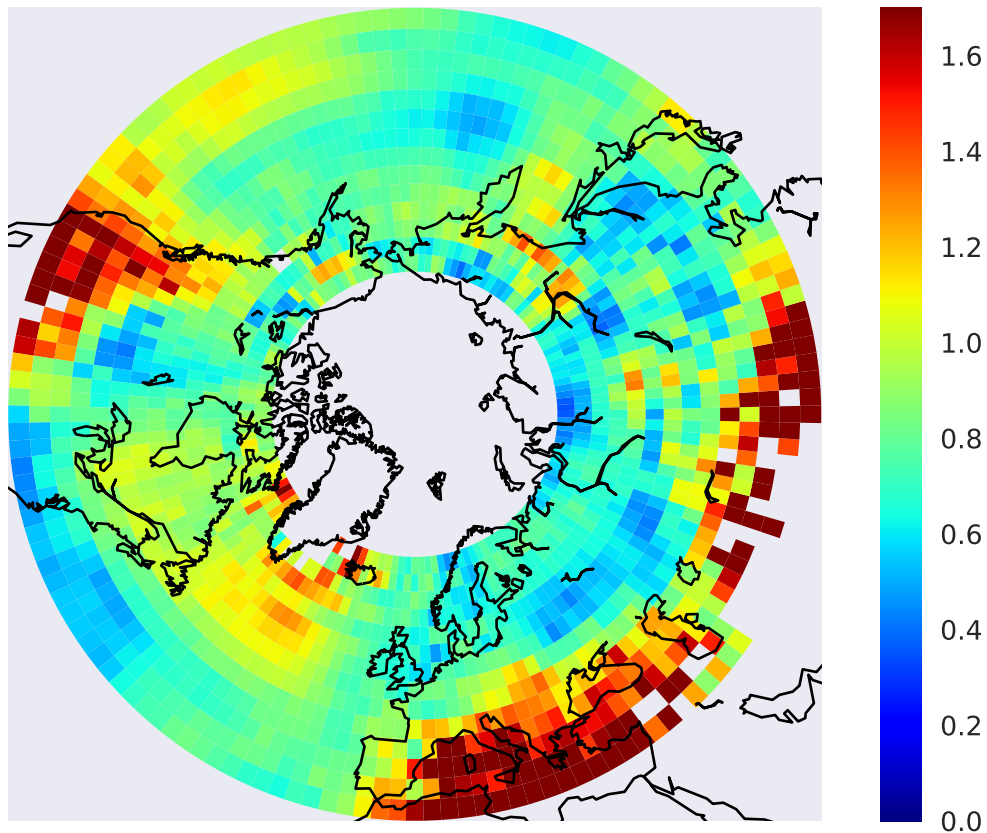

Supplement: Supplementary file 18 [file gmd-15-1375-2022-supplement.zip › supplementary_material/figs-refjra55/maps/mae/MAE_giss_e2_h_r6i1p1_wrt_jra55_nh_1979-2005.pdf]

MAE, mpi\_esm\_1\_2\_hr, r1i1p1f1 w.r.t. jra55, 1979-2005, all seasons

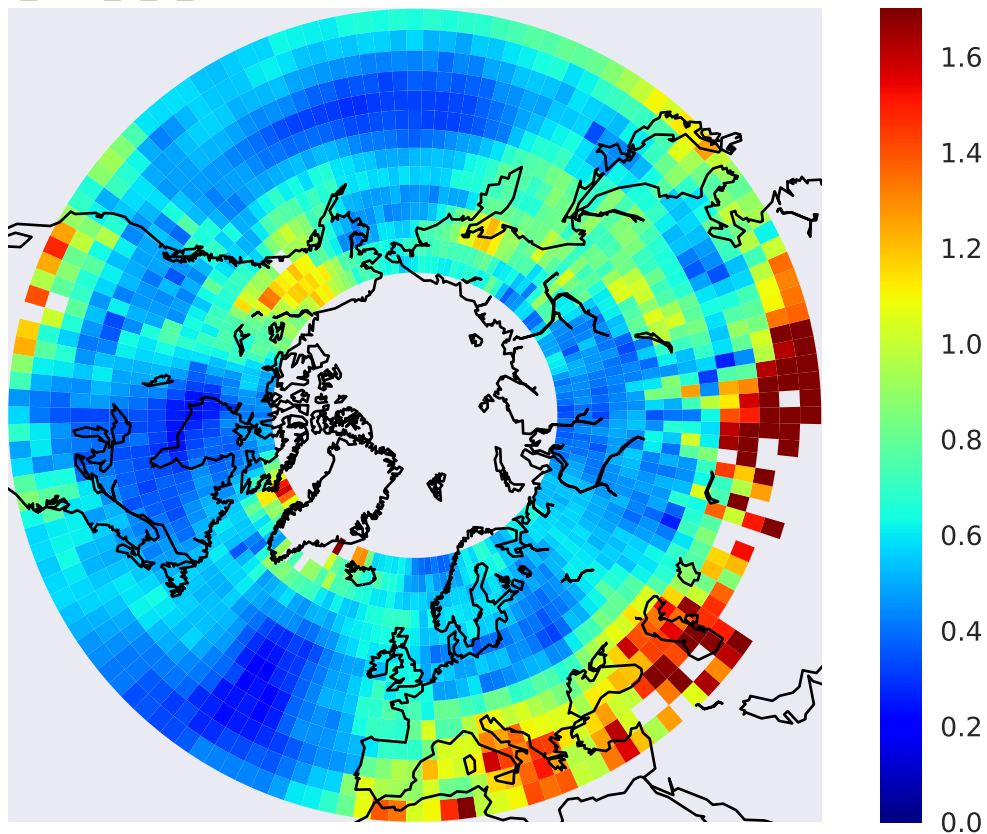

Supplement: Supplementary file 18 [file gmd-15-1375-2022-supplement.zip › supplementary_material/figs-refjra55/maps/mae/MAE_mpi_esm_1_2_hr_r1i1p1f1_wrt_jra55_nh_1979-2005.pdf]

MAE, noresm2\_mm, r1i1p1f1 w.r.t. jra55, 1979-2005, all seasons

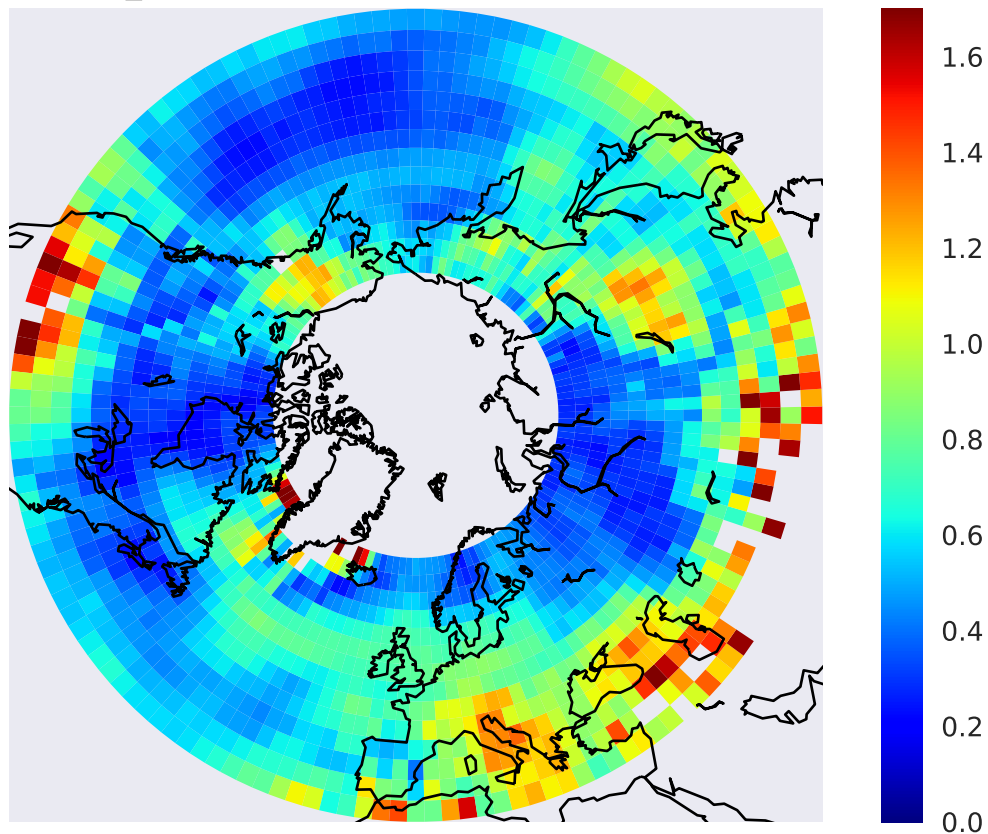

Supplement: Supplementary file 18 [file gmd-15-1375-2022-supplement.zip › supplementary_material/figs-refjra55/maps/mae/MAE_noresm2_mm_r1i1p1f1_wrt_jra55_nh_1979-2005.pdf]

MAE, ipsl\_cm6a\_lr, r1i1p1f1 w.r.t. jra55, 1979-2005, all seasons

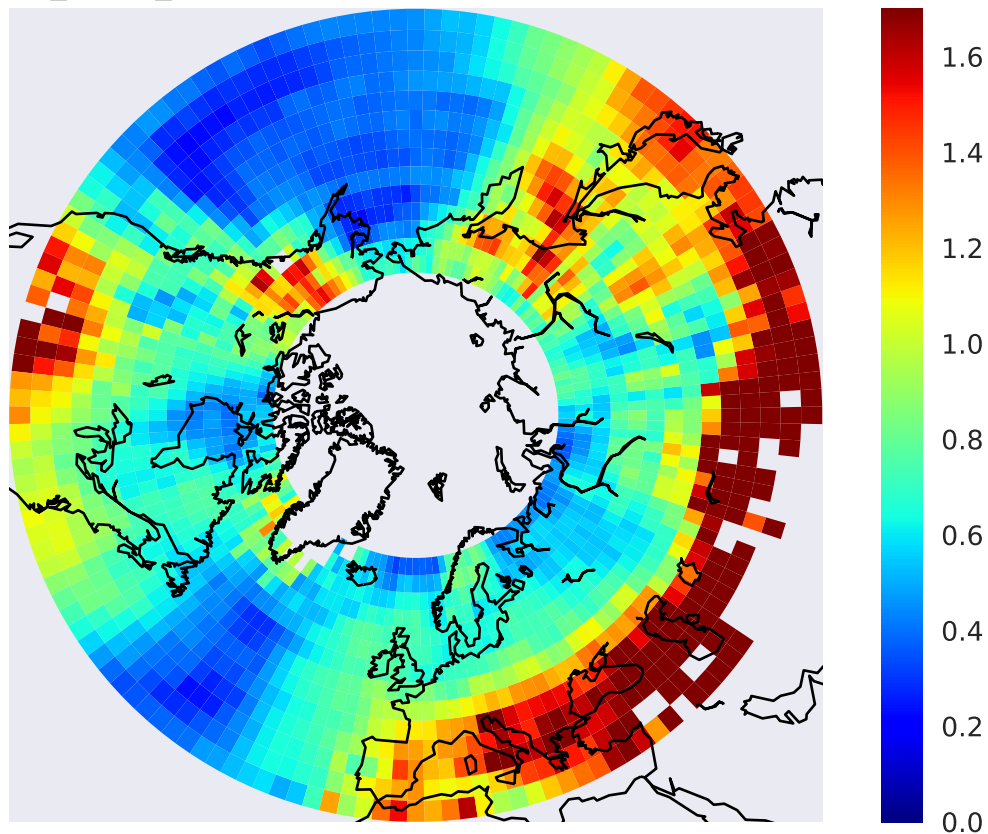

Supplement: Supplementary file 18 [file gmd-15-1375-2022-supplement.zip › supplementary_material/figs-refjra55/maps/mae/MAE_ipsl_cm6a_lr_r1i1p1f1_wrt_jra55_nh_1979-2005.pdf]

MAE, ipsl\_cm5a\_lr, r1i1p1 w.r.t. jra55, 1979-2005, all seasons

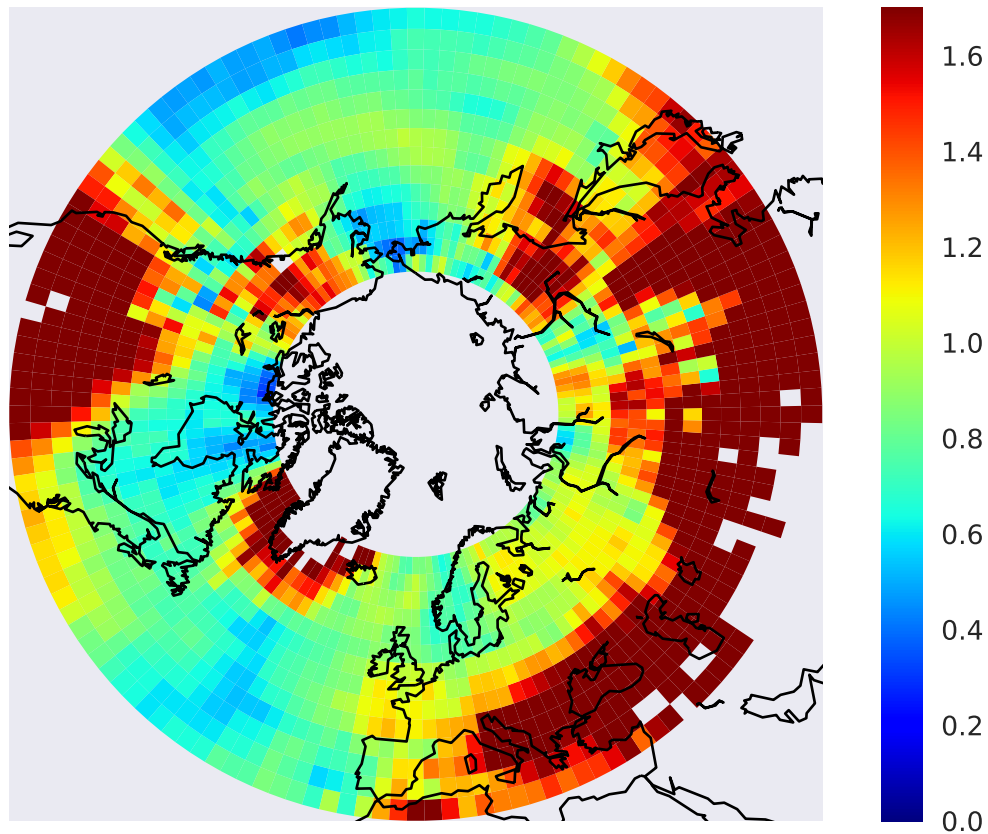

Supplement: Supplementary file 18 [file gmd-15-1375-2022-supplement.zip › supplementary_material/figs-refjra55/maps/mae/MAE_ipsl_cm5a_lr_r1i1p1_wrt_jra55_nh_1979-2005.pdf]

MAE, mri\_esm1, r1i1p1 w.r.t. jra55, 1979-2005, all seasons

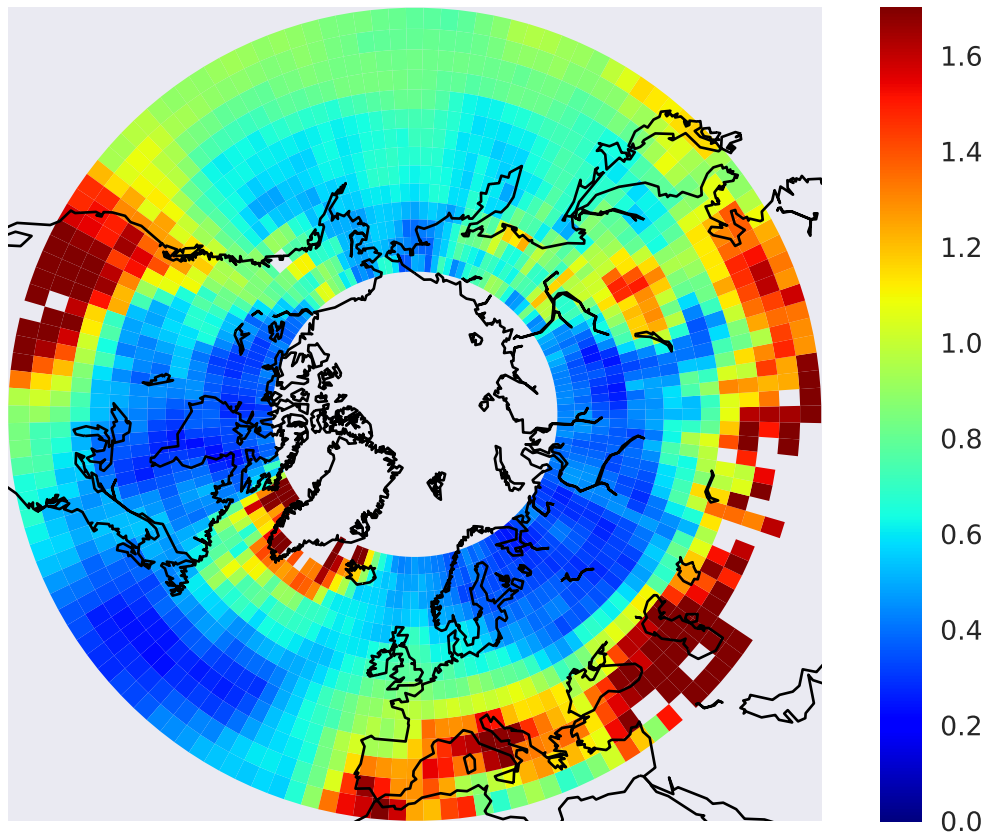

Supplement: Supplementary file 18 [file gmd-15-1375-2022-supplement.zip › supplementary_material/figs-refjra55/maps/mae/MAE_mri_esm1_r1i1p1_wrt_jra55_nh_1979-2005.pdf]

MAE, giss\_e2\_1\_g, r1i1p1f1 w.r.t. jra55, 1979-2005, all seasons

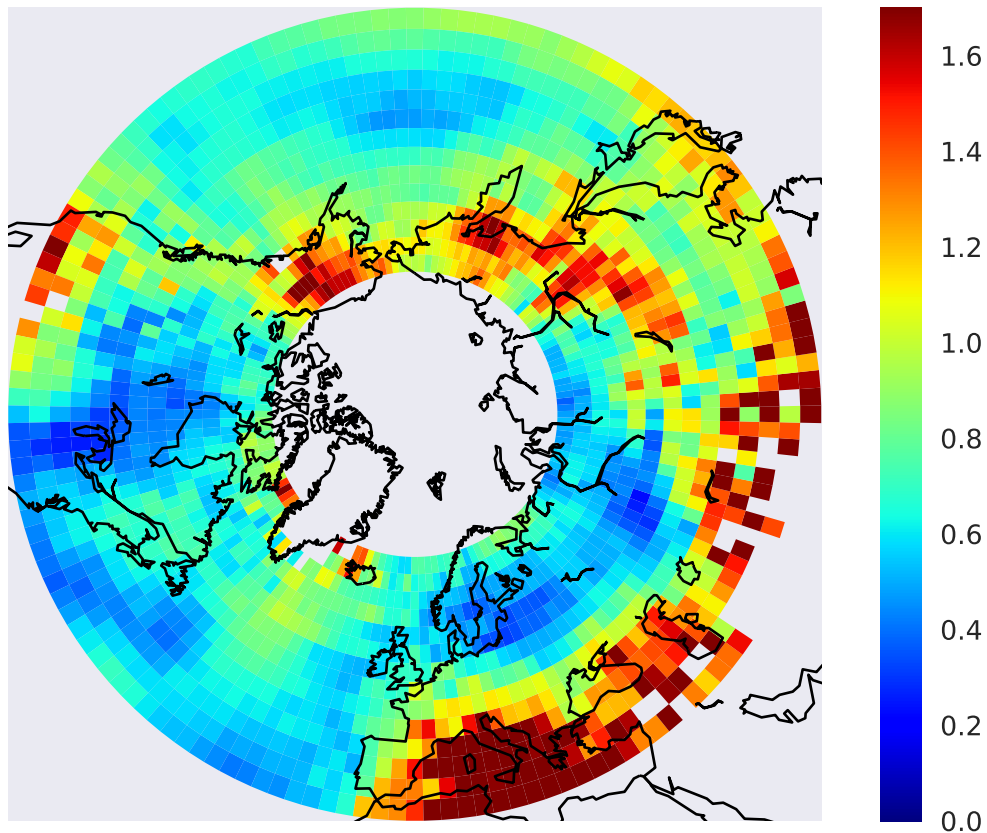

Supplement: Supplementary file 18 [file gmd-15-1375-2022-supplement.zip › supplementary_material/figs-refjra55/maps/mae/MAE_giss_e2_1_g_r1i1p1f1_wrt_jra55_nh_1979-2005.pdf]

MAE, cnrm\_cm6\_1, r1i1p1f2 w.r.t. jra55, 1979-2005, all seasons

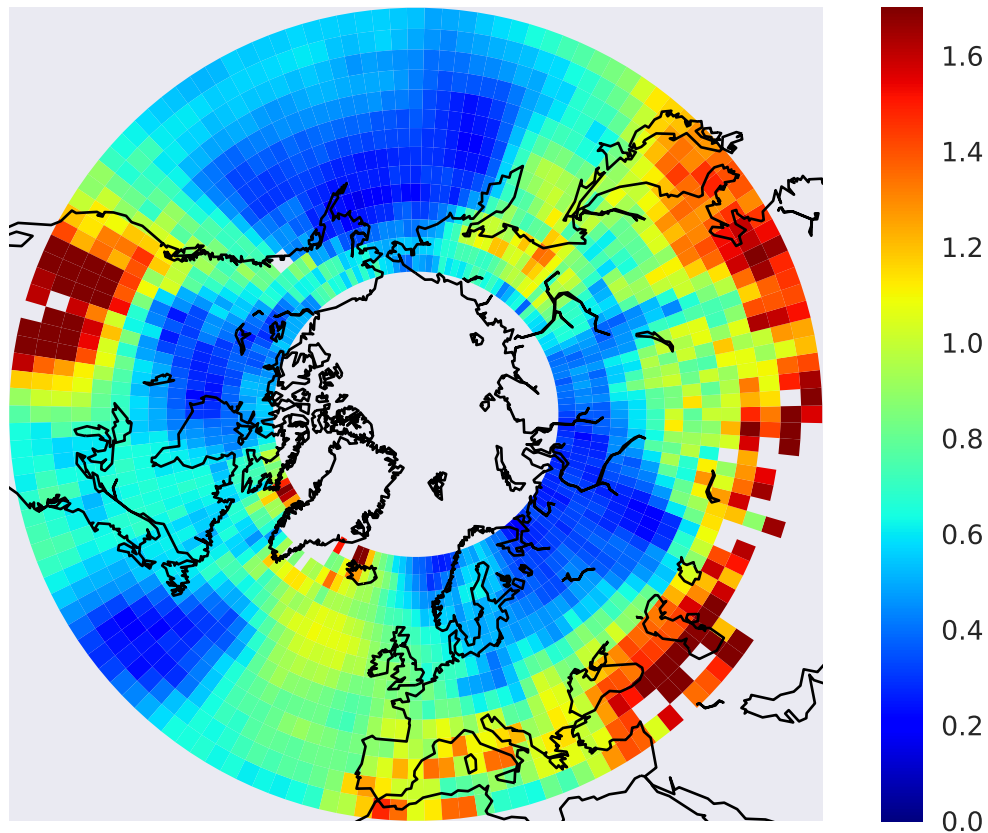

Supplement: Supplementary file 18 [file gmd-15-1375-2022-supplement.zip › supplementary_material/figs-refjra55/maps/mae/MAE_cnrm_cm6_1_r1i1p1f2_wrt_jra55_nh_1979-2005.pdf]

MAE, fgoals\_g3, r3i1p1f1 w.r.t. jra55, 1979-2005, all seasons

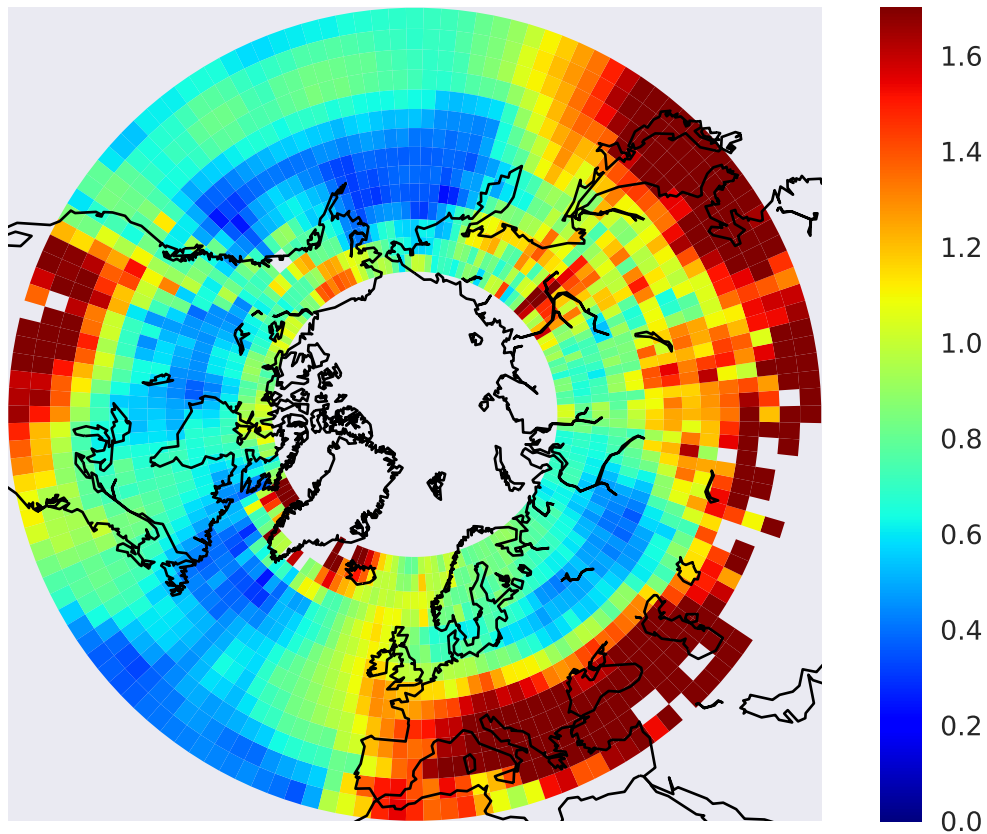

Supplement: Supplementary file 18 [file gmd-15-1375-2022-supplement.zip › supplementary_material/figs-refjra55/maps/mae/MAE_fgoals_g3_r3i1p1f1_wrt_jra55_nh_1979-2005.pdf]

MAE, ec\_earth, r12i1p1 w.r.t. jra55, 1979-2005, all seasons

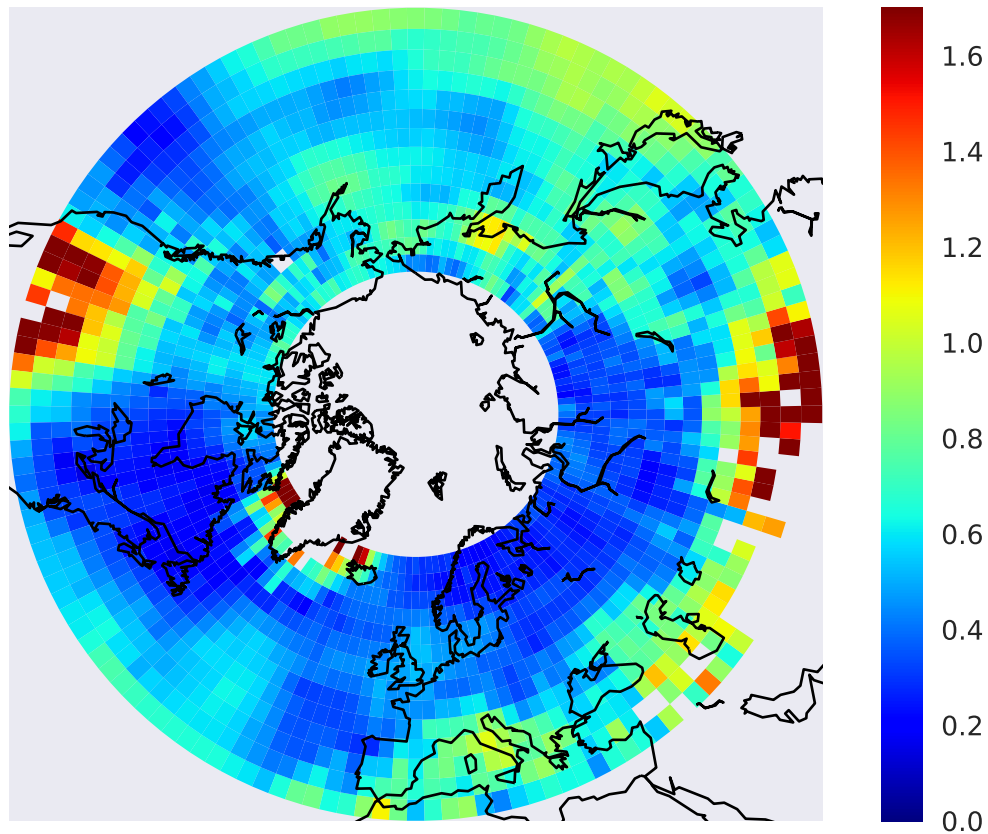

Supplement: Supplementary file 18 [file gmd-15-1375-2022-supplement.zip › supplementary_material/figs-refjra55/maps/mae/MAE_ec_earth_r12i1p1_wrt_jra55_nh_1979-2005.pdf]

MAE, cnrm\_cm6\_1\_hr, r1i1p1f2 w.r.t. jra55, 1979-2005, all seasons

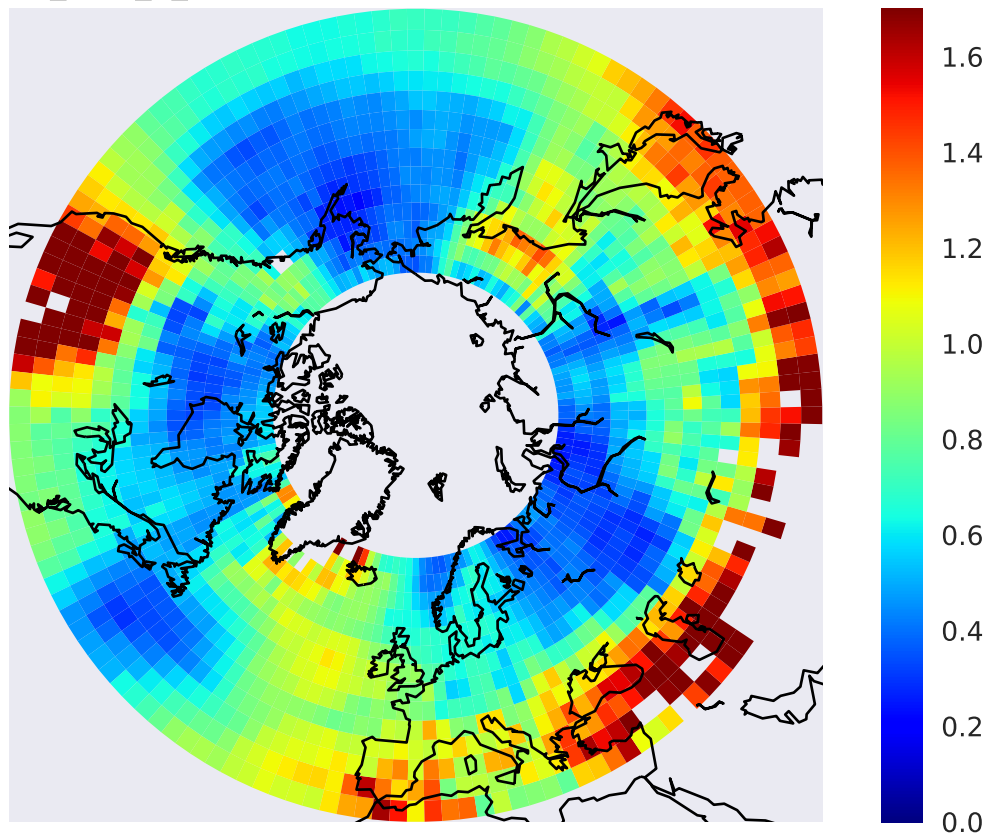

Supplement: Supplementary file 18 [file gmd-15-1375-2022-supplement.zip › supplementary_material/figs-refjra55/maps/mae/MAE_cnrm_cm6_1_hr_r1i1p1f2_wrt_jra55_nh_1979-2005.pdf]

MAE, miroc\_esm, rli1p1 w.r.t. jra55, 1979-2005, all seasons

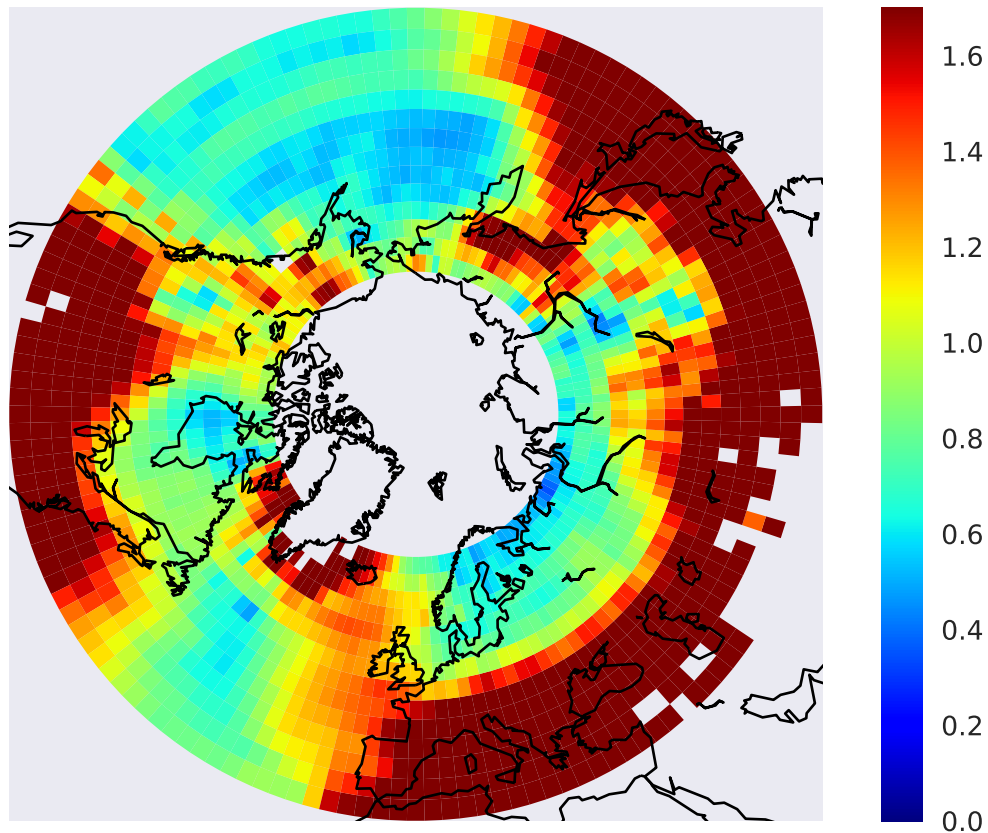

Supplement: Supplementary file 18 [file gmd-15-1375-2022-supplement.zip › supplementary_material/figs-refjra55/maps/mae/MAE_miroc_esm_r1i1p1_wrt_jra55_nh_1979-2005.pdf]

MAE, ec\_earth3, r1i1p1f1 w.r.t. jra55, 1979-2005, all seasons

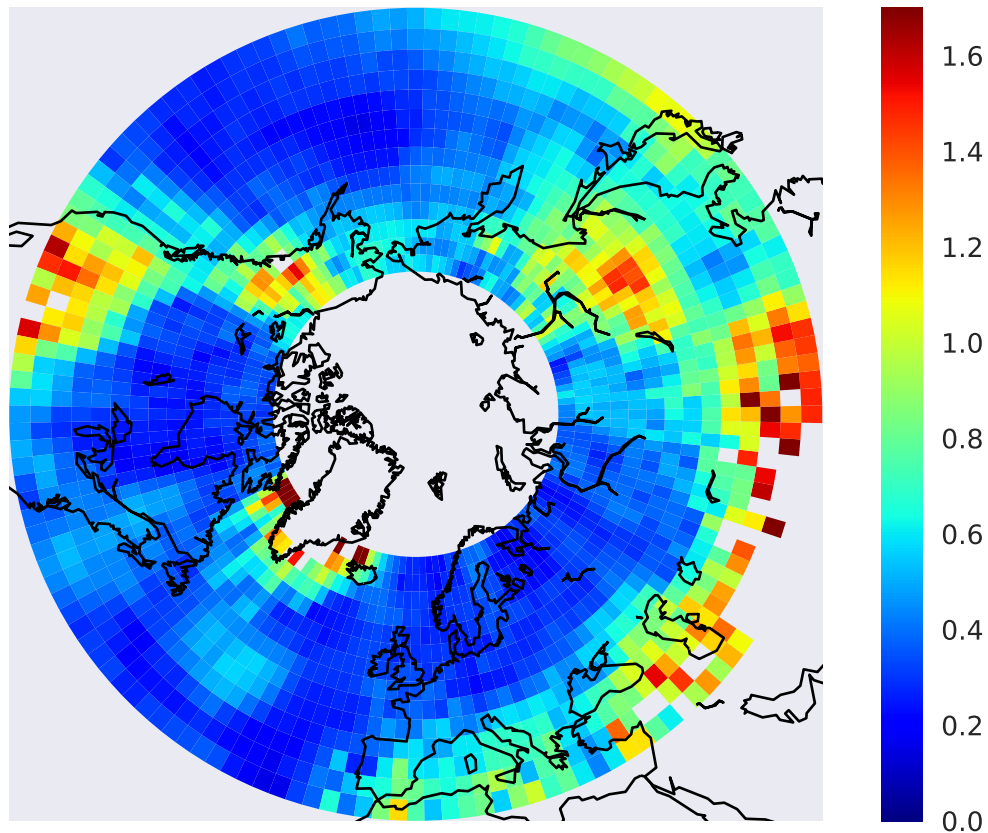

Supplement: Supplementary file 18 [file gmd-15-1375-2022-supplement.zip › supplementary_material/figs-refjra55/maps/mae/MAE_ec_earth3_r1i1p1f1_wrt_jra55_nh_1979-2005.pdf]

MAE, fgoals\_g2, r1i1p1 w.r.t. jra55, 1979-2005, all seasons

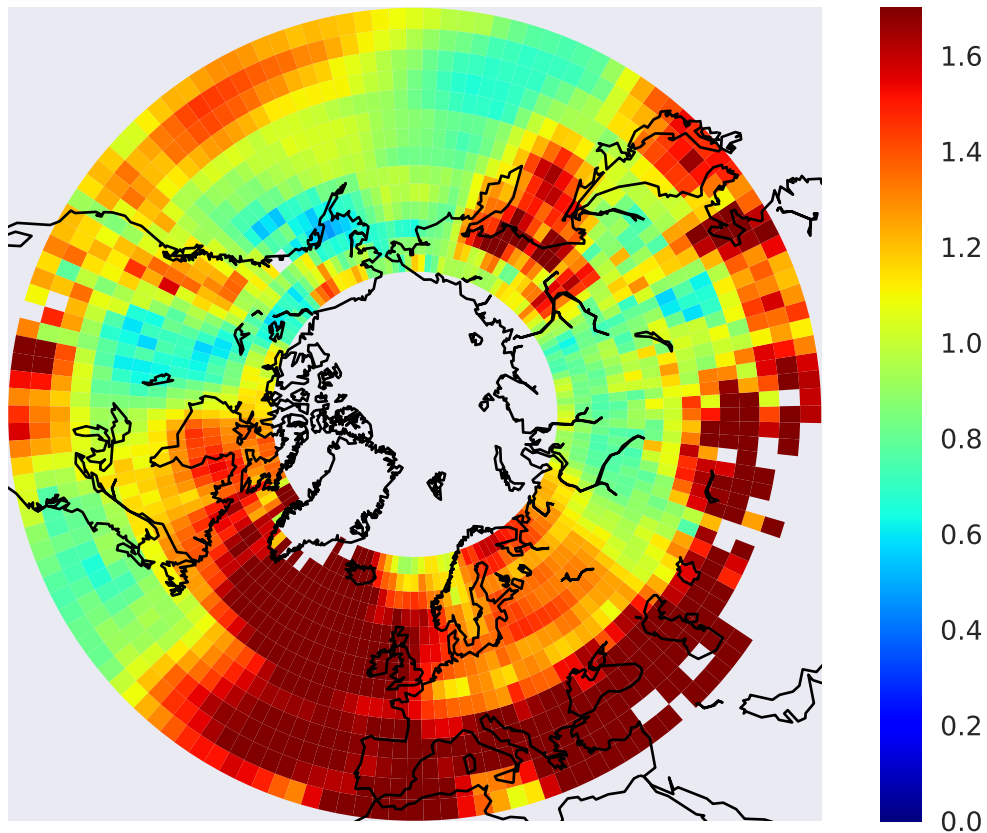

Supplement: Supplementary file 18 [file gmd-15-1375-2022-supplement.zip › supplementary_material/figs-refjra55/maps/mae/MAE_fgoals_g2_r1i1p1_wrt_jra55_nh_1979-2005.pdf]
